# Supplementary material for: De novo transcriptome assembly of mouse male germ cells reveals novel genes, stage-specific bidirectional promoter activity, and noncoding RNA expression
Source: HighWire-hosted journal article supplement (doi:10.1101/gr.278060.123), 2023-12-01
Supplement: Supplemental_Table_S1.xlsx [file Supplemental_Table_S1.xlsx]

## Sheet: Table_S1_Legend
Characterization of novel genes with high coding potential.
Information about the 529 open reading frames with high CPAT scores (see Materials and Methods and Figure 4) and lengths greater than 100 amino acids is displayed. Gene ID, Transcript ID and ORF ID refer to unique identifiers for novel loci (with nested annotation e.g., MSTRG.160.1_65 refers to ORF 65 from transcript isoform 1 of gene MSTR.160). CpG island refers to whether the newly identified g…

## Sheet: Gill_Supplementary_Table_S1
Gene ID	mm10 Genome coordinates	Transcript ID	Multi- vs Mono-exonic	ORF ID	CpG island	ORF length	Protein Length	Protein Mass	Existing transcript annotation	Antisense transcript	Repeat associated	Repeat family	BLASTP hit ID	BLASTP Gene symbol	BLASTP species	BLASTP Percent identity	BLASTP Alignment length	BLASTP Mismatches	BLASTP Gaps	BLASTP query start	BLASTP query end	BLASTP subject start	BLASTP subject end	Percent new protein in BLAST hit	BLASTP E-value	BLASTP bit score	BLASTP percent positives	Retrogene	Domain Hit.type	PSSM.ID	Domain Start	Domain End	Domain length	Domain E-Value	Domain Bitscore	Domain Accession	Domain Short name	Domain Superfamily
MSTRG.160	chr1:30970543-30974364	MSTRG.160.1	mono-exonic	MSTRG.160.1_65	None	1020	340	40.66 kDa	None	None	L1_Mus1	LINE1	AAL17972.1	L1Md-A101	10090 [Organism: house mouse] [Scientific Name: Mus musculus]	88.791	339	38	0	1	339	914	1252	0.997059	0	639	93.22		NA	NA	NA	NA	0	NA	NA	NA	NA	NA
MSTRG.178	chr1:33813237-33815344	MSTRG.178.2	mono-exonic	MSTRG.178.2_16	3' end	651	217	23.01 kDa	None	Exon overlap Zfp451	None	None	NA	NA	NA	NA	NA	NA	NA	NA	NA	NA	NA	0	NA	NA	NA		NA	NA	NA	NA	0	NA	NA	NA	NA	NA
MSTRG.178	chr1:33813237-33815344	MSTRG.178.1	mono-exonic	MSTRG.178.1_61	3' end	651	217	23.01 kDa	None	Exon overlap Zfp451	None	None	NA	NA	NA	NA	NA	NA	NA	NA	NA	NA	NA	0	NA	NA	NA		NA	NA	NA	NA	0	NA	NA	NA	NA	NA
MSTRG.540	chr1:74392089-74397154	MSTRG.540.1	multi-exonic	MSTRG.540.1_57	3' end	912	304	33.35 kDa	None	Exon overlap Ctdsp1	None	None	NA	NA	NA	NA	NA	NA	NA	NA	NA	NA	NA	0	NA	NA	NA		NA	NA	NA	NA	0	NA	NA	NA	NA	NA
MSTRG.617	chr1:83273870-83281203	MSTRG.617.3	multi-exonic	MSTRG.617.3_141	None	630	210	23.02 kDa	None	Exon overlap Sphkap	None	None	NA	NA	NA	NA	NA	NA	NA	NA	NA	NA	NA	0	NA	NA	NA		NA	NA	NA	NA	0	NA	NA	NA	NA	NA
MSTRG.617	chr1:83273870-83281203	MSTRG.617.5	multi-exonic	MSTRG.617.5_12	None	543	181	20.13 kDa	None	Exon overlap Sphkap	None	None	NA	NA	NA	NA	NA	NA	NA	NA	NA	NA	NA	0	NA	NA	NA		NA	NA	NA	NA	0	NA	NA	NA	NA	NA
MSTRG.617	chr1:83273870-83281203	MSTRG.617.4	multi-exonic	MSTRG.617.4_16	None	630	210	23.02 kDa	None	Exon overlap Sphkap	None	None	NA	NA	NA	NA	NA	NA	NA	NA	NA	NA	NA	0	NA	NA	NA		NA	NA	NA	NA	0	NA	NA	NA	NA	NA
MSTRG.800	chr1:98413323-98421005	MSTRG.800.1	mono-exonic	MSTRG.800.1_25	None	1770	590	68.25 kDa	None	None	L1_Md_A	LINE1	GGZ10838.1	Hypothetical protein GCM10010385 69480	68207 [Organism:] [Scientific Name: Streptomyces geysiriensis]	97.288	590	15	1	1	589	98	687	1	0	1168	98.64		specific	238827	358	589	231	1.92e-59	197.128	cd01650	RT_nLTR_like	cl02808
MSTRG.800	chr1:98413323-98421005	MSTRG.800.1	mono-exonic	MSTRG.800.1_25	None	1770	590	68.25 kDa	None	None	L1_Md_A	LINE1	GGZ10838.1	Hypothetical protein GCM10010385 69480	68207 [Organism:] [Scientific Name: Streptomyces geysiriensis]	97.288	590	15	1	1	589	98	687	1	0	1168	98.64		superfamily	412407	1	83	82	1.07e-17	82.3993	cl00490	EEP superfamily	-
MSTRG.800	chr1:98413323-98421005	MSTRG.800.1	mono-exonic	MSTRG.800.1_34	None	543	181	21.03 kDa	None	None	L1_Md_A	LINE1	SFW05840.1	Retron-type Reverse transcriptase	83555 [Organism: Chlamydia abortus] Scientific Name: Chlamydia abortus]	98.113	159	3	0	21	179	135	293	0.878453	1.16e-110	328	98.11		specific	400570	147	164	17	0.000273408	36.5017	pfam08333	DUF1725	cl07081
MSTRG.800	chr1:98413323-98421005	MSTRG.800.1	mono-exonic	MSTRG.800.1_87	None	1023	341	39.85 kDa	None	None	L1_Md_A	LINE1	SFW05838.1	Retron-type Reverse transcriptase	83555 [Organism: Chlamydia abortus] Scientific Name: Chlamydia abortus]	93.706	286	18	0	4	289	854	1139	0.83871	0	561	95.1		NA	NA	NA	NA	0	NA	NA	NA	NA	NA
MSTRG.857	chr1:119113104-119125022	MSTRG.857.1	multi-exonic	MSTRG.857.1_36	None	486	162	17.70 kDa	Gm41934 (XR_001779338.2 ) (ORF 3' of existing annotation)	None	None	None	NA	NA	NA	NA	NA	NA	NA	NA	NA	NA	NA	0	NA	NA	NA		NA	NA	NA	NA	0	NA	NA	NA	NA	NA
MSTRG.857	chr1:119113104-119125022	MSTRG.857.2	multi-exonic	MSTRG.857.2_12	None	918	306	40.05 kDa	Gm41934 (XR_001779338.2 ) (ORF 3' of existing annotation)	None	None	None	NA	NA	NA	NA	NA	NA	NA	NA	NA	NA	NA	0	NA	NA	NA		NA	NA	NA	NA	0	NA	NA	NA	NA	NA
MSTRG.857	chr1:119113104-119125022	MSTRG.857.2	multi-exonic	MSTRG.857.2_52	None	1248	416	48.47 kDa	Gm41934 (XR_001779338.2 ) (ORF 3' of existing annotation)	None	None	None	NA	NA	NA	NA	NA	NA	NA	NA	NA	NA	NA	0	NA	NA	NA		superfamily	237072	173	394	221	3.37e-06	49.0326	cl29258	PRK12355 superfamily	-
MSTRG.857	chr1:119113104-119125022	MSTRG.857.2	multi-exonic	MSTRG.857.2_86	None	873	291	30.93 kDa	Gm41934 (XR_001779338.2 ) (ORF 3' of existing annotation)	None	None	None	NA	NA	NA	NA	NA	NA	NA	NA	NA	NA	NA	0	NA	NA	NA		superfamily	411418	5	243	238	1.22e-11	65.026	cl41472	ser_rich_anae_1 superfamily	-
MSTRG.858	chr1:119200437-119210202	MSTRG.858.1	multi-exonic	MSTRG.858.1_11	None	588	196	21.58 kDa	Gm46144 (XR_001779343.2)	None	None	None	NA	NA	NA	NA	NA	NA	NA	NA	NA	NA	NA	0	NA	NA	NA		NA	NA	NA	NA	0	NA	NA	NA	NA	NA
MSTRG.858	chr1:119200437-119210202	MSTRG.858.2	multi-exonic	MSTRG.858.2_14	None	642	214	23.65 kDa	Gm46144 (XR_001779343.2)	None	None	None	NA	NA	NA	NA	NA	NA	NA	NA	NA	NA	NA	0	NA	NA	NA		NA	NA	NA	NA	0	NA	NA	NA	NA	NA
MSTRG.1040	chr1:136233959-136243443	MSTRG.1040.1	mono-exonic	MSTRG.1040.1_96	5' end	507	169	18.43 kDa	None	Promoter overlap Inava	None	None	NA	NA	NA	NA	NA	NA	NA	NA	NA	NA	NA	0	NA	NA	NA		NA	NA	NA	NA	0	NA	NA	NA	NA	NA
MSTRG.1040	chr1:136233959-136243443	MSTRG.1040.1	mono-exonic	MSTRG.1040.1_125	5' end	744	248	27.30 kDa	None	Promoter overlap Inava	MERVL_2A-int	ERVL	CRH56929.1	Deoxyuridine 5'-triphosphate nucleotidohydrolase	813 [Organism: Chlamydia trachomatis] [Scientific Name: Chlamydia trachomatis]	79.098	244	50	1	5	247	1	244	0.983871	5.53e-129	375	85.25		specific	143638	92	166	74	3.06e-15	68.6749	cd07557	trimeric_dUTPase	cl00493
MSTRG.1289	chr1:167306167-167350407	MSTRG.1289.1	multi-exonic	MSTRG.1289.1_22	ORF overlap	678	226	24.22 kDa	None	Exon overlap Tmco1	None	None	NA	NA	NA	NA	NA	NA	NA	NA	NA	NA	NA	0	NA	NA	NA		NA	NA	NA	NA	0	NA	NA	NA	NA	NA
MSTRG.1369	chr1:172374823-172378017	MSTRG.1369.1	mono-exonic	MSTRG.1369.1_58	ORF overlap	1017	339	35.87 kDa	None	None	None	None	NA	NA	NA	NA	NA	NA	NA	NA	NA	NA	NA	0	NA	NA	NA		NA	NA	NA	NA	0	NA	NA	NA	NA	NA
MSTRG.1403	chr1:178000509-178008267	MSTRG.1403.1	multi-exonic	MSTRG.1403.1_22	None	1908	636	73.49 kDa	None	Exon overlap Catspere2	L1_Md_T	LINE1	WP_191862807.1	Reverse transcriptase domain-containing protein	68207 [Organism:] [Scientific Name: Streptomyces geysiriensis]	97.48	635	15	1	1	634	259	893	0.998428	0	1252	98.43		specific	238827	259	521	262	1.53e-69	224.863	cd01650	RT_nLTR_like	cl02808
MSTRG.1403	chr1:178000509-178008267	MSTRG.1403.1	multi-exonic	MSTRG.1403.1_61	None	909	303	35.97 kDa	None	Exon overlap Catspere2	L1_Md_T	LINE1	GGZ10838.1	Hypothetical protein GCM10010385 69480	68207 [Organism:] [Scientific Name: Streptomyces geysiriensis]	96.928	293	9	0	10	302	840	1132	0.966997	0	603	97.95		NA	NA	NA	NA	0	NA	NA	NA	NA	NA
MSTRG.2383	chr10:80888197-80895933	MSTRG.2383.1	multi-exonic	MSTRG.2383.1_9	3' end	744	248	27.37 kDa	None	Exon overlap Tmprss9	None	None	XP_036027107.1	Tmprss9	38674 [Organism: southern grasshopper mouse] [Scientific Name: Onychomys torridus]	76.596	47	10	1	134	180	162	207	0.189516	2.88e-09	69.3	82.98		NA	NA	NA	NA	0	NA	NA	NA	NA	NA
MSTRG.2419	chr10:81418814-81424191	MSTRG.2419.1	multi-exonic	MSTRG.2419.1_77	ORF overlap	627	209	23.39 kDa	Gm51811 (XR_003949025.1) (Downstream of ORF)	Exon overlap Nfic	None	None	EDL31408.1	mCG148089	10090 [Organism: house mouse] [Scientific Name: Mus musculus]	100	200	0	0	9	208	1	200	0.956938	1.57e-101	302	100		NA	NA	NA	NA	0	NA	NA	NA	NA	NA
MSTRG.3084	chr11:6287080-6292310	MSTRG.3084.1	mono-exonic	MSTRG.3084.1_98	ORF overlap	699	233	24.98 kDa	None	Exon overlap Ogdh	None	None	XP_023082262.1	Perk2 (proline-rich receptor-like protein kinase PERK2) LOC111552315	591936 [Organism: Ugandan red Colobus] [Scientific Name: Piliocolobus tephrosceles]	64.815	54	18	1	171	223	198	251	0.23176	1.21e-06	60.5	70.37		NA	NA	NA	NA	0	NA	NA	NA	NA	NA
MSTRG.3093	chr11:6448675-6452535	MSTRG.3093.2	mono-exonic	MSTRG.3093.2_61	None	819	273	31.43 kDa	None	None	MMERVK10c-int	ERVK	SFW07156.1	Retroviral Envelope protein	83555 [Organism: Chlamydia abortus] Scientific Name: Chlamydia abortus]	98.374	246	4	0	27	272	1	246	0.901099	0	508	99.19		NA	NA	NA	NA	0	NA	NA	NA	NA	NA
MSTRG.3093	chr11:6448675-6452535	MSTRG.3093.1	mono-exonic	MSTRG.3093.1_9	None	819	273	31.43 kDa	None	None	MMERVK10c-int	ERVK	SFW07156.1	Retroviral Envelope protein	83555 [Organism: Chlamydia abortus] Scientific Name: Chlamydia abortus]	98.374	246	4	0	27	272	1	246	0.901099	0	508	99.19		NA	NA	NA	NA	0	NA	NA	NA	NA	NA
MSTRG.3093	chr11:6448675-6452535	MSTRG.3093.1	mono-exonic	MSTRG.3093.1_138	None	525	175	19.92 kDa	None	None	MMERVK10c-int	ERVK	XP_028637817.1	LOC114633397	491861 [Organism: ] [Scientific Name: Grammomys surdaster]	78.205	78	17	0	86	163	11	88	0.445714	1.42e-34	131	83.33		superfamily	395483	86	160	74	3.37e-06	45.23	cl02908	Gag_p24 superfamily	-
MSTRG.3277	chr11:33162881-33164340	MSTRG.3277.1	mono-exonic	MSTRG.3277.1_10	ORF overlap	606	202	22.08 kDa	None	Promoter overlap MSTRG.3276	None	None	NA	NA	NA	NA	NA	NA	NA	NA	NA	NA	NA	0	NA	NA	NA		NA	NA	NA	NA	0	NA	NA	NA	NA	NA
MSTRG.3740	chr11:69671392-69679263	MSTRG.3740.1	multi-exonic	MSTRG.3740.1_1	ORF overlap	540	180	19.44 kDa	None	Exon overlap MSTRG.3739	None	None	XP_031210655.1	LOC116079096	35658 [Organism: southern multimammate mouse] [Scientific Name: Mastomys coucha]	92.81	153	11	0	1	153	1	153	0.85	8.9e-82	251	94.77		NA	NA	NA	NA	0	NA	NA	NA	NA	NA
MSTRG.3740	chr11:69671392-69679263	MSTRG.3740.1	multi-exonic	MSTRG.3740.1_10	ORF overlap	873	291	31.51 kDa	None	Exon overlap MSTRG.3739	None	None	XP_032770242.1	LOC116910476	10117 [Organism: black rat] [Scientific Name: Rattus rattus]	69.302	215	65	1	45	259	1	214	0.738832	1.87e-70	229	72.56		superfamily	223021	9	211	202	0.00427913	38.7661	cl33720	PHA03247 superfamily	-
MSTRG.3740	chr11:69671392-69679263	MSTRG.3740.2	multi-exonic	MSTRG.3740.2_1	ORF overlap	963	321	34.73 kDa	None	Exon overlap MSTRG.3739	None	None	XP_032770242.1	LOC116910476	10117 [Organism: black rat] [Scientific Name: Rattus rattus]	61.852	270	67	3	45	314	1	234	0.841121	2.77e-75	242	64.44		superfamily	223021	9	230	221	0.00331163	39.1513	cl33720	PHA03247 superfamily	-
MSTRG.3740	chr11:69671392-69679263	MSTRG.3740.2	multi-exonic	MSTRG.3740.2_14	ORF overlap	540	180	19.44 kDa	None	Exon overlap MSTRG.3739	None	None	XP_031210655.1	LOC116079096	35658 [Organism: southern multimammate mouse] [Scientific Name: Mastomys coucha]	92.81	153	11	0	1	153	1	153	0.85	8.9e-82	251	94.77		NA	NA	NA	NA	0	NA	NA	NA	NA	NA
MSTRG.3759	chr11:69921339-69923303	MSTRG.3759.1	mono-exonic	MSTRG.3759.1_15	ORF overlap	663	221	24.44 kDa	None	Promoter overlap Eif5a	None	None	XP_035295274.1	Ybx2	10029 [Organism: Chinese hamster] [Scientific Name: Cricetulus griseus]	64.655	116	35	2	63	178	23	132	0.524887	6.08e-24	109	72.41		NA	NA	NA	NA	0	NA	NA	NA	NA	NA
MSTRG.3897	chr11:75728048-75756867	MSTRG.3897.1	multi-exonic	MSTRG.3897.1_2	3' end	717	239	25.51 kDa	None	Exon overlap Ywhae	None	None	TNN47348.1	Hypothetical protein EYF80 042436	230148 [Organism: Tanaka's snailfish] [Scientific Name: Liparis tanakae]	90.476	42	4	0	56	97	32	73	0.175732	9.05e-12	74.3	92.86		NA	NA	NA	NA	0	NA	NA	NA	NA	NA
MSTRG.3897	chr11:75728048-75756867	MSTRG.3897.1	multi-exonic	MSTRG.3897.1_44	3' end	681	227	24.78 kDa	None	Exon overlap Ywhae	None	None	NA	NA	NA	NA	NA	NA	NA	NA	NA	NA	NA	0	NA	NA	NA		NA	NA	NA	NA	0	NA	NA	NA	NA	NA
MSTRG.4320	chr11:98066145-98078229	MSTRG.4320.1	mono-exonic	MSTRG.4320.1_27	None	537	179	19.10 kDa	None	None	MMERVK10c-int	ERVK	XP_031218518.1	deoxyuridine 5'-triphosphate nucleotidohydrolase-like (LOC116085231)	35658 [Organism: southern multimammate mouse] [Scientific Name: Mastomys coucha]	64.972	177	62	0	1	177	51	227	0.988827	1e-71	228	77.97		superfamily	412409	10	129	119	8.4e-25	93.1223	cl00493	trimeric_dUTPase superfamily	-
MSTRG.4320	chr11:98066145-98078229	MSTRG.4320.1	mono-exonic	MSTRG.4320.1_27	None	537	179	19.10 kDa	None	None	MMERVK10c-int	ERVK	XP_031218518.1	deoxyuridine 5'-triphosphate nucleotidohydrolase-like (LOC116085231)	35658 [Organism: southern multimammate mouse] [Scientific Name: Mastomys coucha]	64.972	177	62	0	1	177	51	227	0.988827	1e-71	228	77.97		superfamily	416259	145	177	32	2.69e-10	54.1945	cl11403	pepsin_retropepsin_like superfamily	-
MSTRG.4320	chr11:98066145-98078229	MSTRG.4320.1	mono-exonic	MSTRG.4320.1_28	None	1203	401	45.45 kDa	None	None	MMERVK10c-int	ERVK	JC7527	Nuclear retroviral polymerase-like protein	10116 [Organism: Norway rat] [Scientific Name: Rattus norvegicus]	68.705	278	86	1	68	345	84	360	0.693267	7.41e-138	408	82.01		specific	399655	88	153	65	2.13e-31	113.949	pfam06817	RVT_thumb	cl06055
MSTRG.4320	chr11:98066145-98078229	MSTRG.4320.1	mono-exonic	MSTRG.4320.1_28	None	1203	401	45.45 kDa	None	None	MMERVK10c-int	ERVK	JC7527	Nuclear retroviral polymerase-like protein	10116 [Organism: Norway rat] [Scientific Name: Rattus norvegicus]	68.705	278	86	1	68	345	84	360	0.693267	7.41e-138	408	82.01		superfamily	417494	301	400	99	3.25e-21	88.5492	cl14782	RNase_H_like superfamily	-
MSTRG.4320	chr11:98066145-98078229	MSTRG.4320.1	mono-exonic	MSTRG.4320.1_28	None	1203	401	45.45 kDa	None	None	MMERVK10c-int	ERVK	JC7527	Nuclear retroviral polymerase-like protein	10116 [Organism: Norway rat] [Scientific Name: Rattus norvegicus]	68.705	278	86	1	68	345	84	360	0.693267	7.41e-138	408	82.01		superfamily	416259	2	31	29	1.37e-06	46.1053	cl11403	pepsin_retropepsin_like superfamily	-
MSTRG.4320	chr11:98066145-98078229	MSTRG.4320.1	mono-exonic	MSTRG.4320.1_28	None	1203	401	45.45 kDa	None	None	MMERVK10c-int	ERVK	JC7527	Nuclear retroviral polymerase-like protein	10116 [Organism: Norway rat] [Scientific Name: Rattus norvegicus]	68.705	278	86	1	68	345	84	360	0.693267	7.41e-138	408	82.01		specific	197727	39	79	40	2.16e-05	41.3766	smart00443	G_patch	cl02611
MSTRG.4320	chr11:98066145-98078229	MSTRG.4320.1	mono-exonic	MSTRG.4320.1_108	None	1638	546	60.84 kDa	None	None	MMERVK10c-int	ERVK	EGV95615.1	Retrovirus-related Gag polyprotein	10029 [Organism: Chinese hamster] [Scientific Name: Cricetulus griseus]	61.072	429	137	9	136	545	76	493	0.785714	9e-171	503	72.49		superfamily	395483	207	392	185	2.24e-39	141.915	cl02908	Gag_p24 superfamily	-
MSTRG.4320	chr11:98066145-98078229	MSTRG.4320.1	mono-exonic	MSTRG.4320.1_108	None	1638	546	60.84 kDa	None	None	MMERVK10c-int	ERVK	EGV95615.1	Retrovirus-related Gag polyprotein	10029 [Organism: Chinese hamster] [Scientific Name: Cricetulus griseus]	61.072	429	137	9	136	545	76	493	0.785714	9e-171	503	72.49		superfamily	227414	426	475	49	2.91e-06	47.9231	cl34894	AIR1 superfamily	-
MSTRG.4333	chr11:98575811-98577822	MSTRG.4333.3	multi-exonic	MSTRG.4333.3_40	None	807	269	28.96 kDa	Gm31460 (XR_880200.3)	None	None	None	EPQ05040.1	Hypothetical protein D623 1003037	109478 [Organism: Brandt's bat] [Scientific Name: Myotis brandtii]	71.698	53	13	2	189	240	109	160	0.197026	1.55e-12	75.1	83.02		NA	NA	NA	NA	0	NA	NA	NA	NA	NA
MSTRG.4333	chr11:98575811-98577822	MSTRG.4333.4	multi-exonic	MSTRG.4333.4_40	None	810	270	29.09 kDa	Gm31460 (XR_880200.3)	None	None	None	NA	NA	NA	NA	NA	NA	NA	NA	NA	NA	NA	0	NA	NA	NA		NA	NA	NA	NA	0	NA	NA	NA	NA	NA
MSTRG.4463	chr11:102347067-102354767	MSTRG.4463.1	mono-exonic	MSTRG.4463.1_41	None	495	165	17.82 kDa	None	Exon overlap Slc4a1	None	None	NA	NA	NA	NA	NA	NA	NA	NA	NA	NA	NA	0	NA	NA	NA		NA	NA	NA	NA	0	NA	NA	NA	NA	NA
MSTRG.4463	chr11:102347067-102354767	MSTRG.4463.1	mono-exonic	MSTRG.4463.1_78	None	783	261	29.27 kDa	None	Exon overlap Slc4a1	None	None	KAG7278544.1	CRUP 009808 (Hypothetical protein)	163118 [Organism: roundnose grenadier] [Scientific Name: Coryphaenoides rupestris]	64.103	39	14	0	147	185	843	881	0.149425	0.000635	53.5	74.36		NA	NA	NA	NA	0	NA	NA	NA	NA	NA
MSTRG.4683	chr11:115391426-115393866	MSTRG.4683.1	multi-exonic	MSTRG.4683.1_10	5' end	699	233	25.90 kDa	None	Exon overlap Cdr21	None	None	NA	NA	NA	NA	NA	NA	NA	NA	NA	NA	NA	0	NA	NA	NA		NA	NA	NA	NA	0	NA	NA	NA	NA	NA
MSTRG.5202	chr12:54721003-54729171	MSTRG.5202.1	multi-exonic	MSTRG.5202.1_45	None	873	291	31.89 kDa	None	None	MMERVK10c-int	ERVK	EDL07967.1	mCG1029965	10090 [Organism: house mouse] [Scientific Name: Mus musculus]	93.95	281	17	0	1	281	50	330	0.965636	6.06e-178	513	95.37		NA	NA	NA	NA	0	NA	NA	NA	NA	NA
MSTRG.5202	chr12:54721003-54729171	MSTRG.5202.1	multi-exonic	MSTRG.5202.1_89	None	798	266	29.51 kDa	None	None	MMERVK10c-int	ERVK	SFW07156.1	Retroviral Envelope protein	83555 [Organism: Chlamydia abortus] Scientific Name: Chlamydia abortus]	96.923	195	5	1	35	228	52	246	0.733083	5.63e-133	386	97.44		NA	NA	NA	NA	0	NA	NA	NA	NA	NA
MSTRG.5235	chr12:56150191-56158565	MSTRG.5235.1	multi-exonic	MSTRG.5235.1_38	None	480	160	18.62 kDa	None	None	L1_Md_F2	LINE1	SFW05840.1	Retron-type Reverse transcriptase	83555 [Organism: Chlamydia abortus] Scientific Name: Chlamydia abortus]	95.205	146	7	0	1	146	96	241	0.9125	2.19e-98	296	98.63		NA	NA	NA	NA	0	NA	NA	NA	NA	NA
MSTRG.5235	chr12:56150191-56158565	MSTRG.5235.1	multi-exonic	MSTRG.5235.1_78	None	1551	517	60.12 kDa	None	None	L1_Md_F2	LINE1	SHD82720.1	Retron-type Reverse transcriptase	83555 [Organism: Chlamydia abortus] Scientific Name: Chlamydia abortus]	91.86	516	42	0	1	516	202	717	0.998066	0	978	94.96		specific	238827	20	282	262	2.96e-65	210.61	cd01650	RT_nLTR_like	cl02808
MSTRG.5235	chr12:56150191-56158565	MSTRG.5235.1	multi-exonic	MSTRG.5235.1_91	None	459	153	16.94 kDa	None	None	L1_Md_Gf	LINE1	EDL18365.1	mCG145292	10090 [Organism: house mouse] [Scientific Name: Mus musculus]	78.846	52	10	1	5	55	1	52	0.339869	4.18e-15	79	86.54		NA	NA	NA	NA	0	NA	NA	NA	NA	NA
MSTRG.5363	chr12:72407323-72410491	MSTRG.5363.1	mono-exonic	MSTRG.5363.1_7	ORF overlap	636	212	21.12 kDa	None	Exon overlap Rtn1	None	None	NA	NA	NA	NA	NA	NA	NA	NA	NA	NA	NA	0	NA	NA	NA		NA	NA	NA	NA	0	NA	NA	NA	NA	NA
MSTRG.5363	chr12:72407323-72410491	MSTRG.5363.1	mono-exonic	MSTRG.5363.1_27	ORF overlap	594	198	21.35 kDa	None	Exon overlap Rtn1	None	None	NA	NA	NA	NA	NA	NA	NA	NA	NA	NA	NA	0	NA	NA	NA		NA	NA	NA	NA	0	NA	NA	NA	NA	NA
MSTRG.5396	chr12:74301441-74310552	MSTRG.5396.1	mono-exonic	MSTRG.5396.1_28	None	513	171	19.42 kDa	None	Short 3' end overlap to Dbpht2	MMERVK10c-int	ERVK	SFW07156.1	Retroviral Envelope protein	83555 [Organism: Chlamydia abortus] Scientific Name: Chlamydia abortus]	96.212	132	5	0	9	140	1	132	0.77193	5.32e-88	268	99.24		NA	NA	NA	NA	0	NA	NA	NA	NA	NA
MSTRG.5396	chr12:74301441-74310552	MSTRG.5396.1	mono-exonic	MSTRG.5396.1_79	None	1695	565	63.79 kDa	None	Short 3' end overlap to Dbpht2	MMERVK10c-int	ERVK	SFW07159.1	Reverse transcriptase (RNA-dependent DNA polymerase)	83555 [Organism: Chlamydia abortus] Scientific Name: Chlamydia abortus]	90.667	375	30	1	57	426	36	410	0.663717	0	706	94.93		superfamily	413489	57	238	181	8.52e-95	288.027	cl02808	RT_like superfamily	-
MSTRG.5396	chr12:74301441-74310552	MSTRG.5396.1	mono-exonic	MSTRG.5396.1_79	None	1695	565	63.79 kDa	None	Short 3' end overlap to Dbpht2	MMERVK10c-int	ERVK	SFW07159.1	Reverse transcriptase (RNA-dependent DNA polymerase)	83555 [Organism: Chlamydia abortus] Scientific Name: Chlamydia abortus]	90.667	375	30	1	57	426	36	410	0.663717	0	706	94.93		specific	399655	245	305	60	5.92e-32	117.416	pfam06817	RVT_thumb	cl06055
MSTRG.5396	chr12:74301441-74310552	MSTRG.5396.1	mono-exonic	MSTRG.5396.1_79	None	1695	565	63.79 kDa	None	Short 3' end overlap to Dbpht2	MMERVK10c-int	ERVK	SFW07159.1	Reverse transcriptase (RNA-dependent DNA polymerase)	83555 [Organism: Chlamydia abortus] Scientific Name: Chlamydia abortus]	90.667	375	30	1	57	426	36	410	0.663717	0	706	94.93		superfamily	417494	458	564	106	7.08e-25	99.72	cl14782	RNase_H_like superfamily	-
MSTRG.5396	chr12:74301441-74310552	MSTRG.5396.1	mono-exonic	MSTRG.5396.1_110	None	474	158	17.20 kDa	None	Short 3' end overlap to Dbpht2	MYSERV16_I-int	ERVK	NA	NA	NA	NA	NA	NA	NA	NA	NA	NA	NA	0	NA	NA	NA		NA	NA	NA	NA	0	NA	NA	NA	NA	NA
MSTRG.5396	chr12:74301441-74310552	MSTRG.5396.1	mono-exonic	MSTRG.5396.1_164	None	897	299	33.33 kDa	None	Short 3' end overlap to Dbpht2	MMERVK10c-int	ERVK	SFW07158.1	Integrase core domain	83555 [Organism: Chlamydia abortus] Scientific Name: Chlamydia abortus]	95.987	299	11	1	1	298	237	535	1	0	600	97.99		superfamily	411202	78	187	109	3.07e-23	96.1207	cl41329	transpos_IS481 superfamily	-
MSTRG.5396	chr12:74301441-74310552	MSTRG.5396.1	mono-exonic	MSTRG.5396.1_164	None	897	299	33.33 kDa	None	Short 3' end overlap to Dbpht2	MMERVK10c-int	ERVK	SFW07158.1	Integrase core domain	83555 [Organism: Chlamydia abortus] Scientific Name: Chlamydia abortus]	95.987	299	11	1	1	298	237	535	1	0	600	97.99		specific	396557	26	61	35	6.27e-12	58.8655	pfam02022	Integrase_Zn	cl08339
MSTRG.5396	chr12:74301441-74310552	MSTRG.5396.1	mono-exonic	MSTRG.5396.1_164	None	897	299	33.33 kDa	None	Short 3' end overlap to Dbpht2	MMERVK10c-int	ERVK	SFW07158.1	Integrase core domain	83555 [Organism: Chlamydia abortus] Scientific Name: Chlamydia abortus]	95.987	299	11	1	1	298	237	535	1	0	600	97.99		superfamily	395437	239	282	43	1.08e-10	55.8612	cl02895	IN_DBD_C superfamily	-
MSTRG.5619	chr12:90359115-90364115	MSTRG.5619.1	mono-exonic	MSTRG.5619.1_7	None	1680	560	64.91 kDa	None	None	L1_Md_F2	LINE1	WP_191862807.1	Reverse transcriptase domain-containing protein	68207 [Organism:] [Scientific Name: Streptomyces geysiriensis]	93.918	559	31	1	1	559	1	556	0.998214	0	1038	96.06		specific	197310	17	242	225	2.75e-63	207.204	cd09076	L1-EN	cl00490
MSTRG.5619	chr12:90359115-90364115	MSTRG.5619.1	mono-exonic	MSTRG.5619.1_7	None	1680	560	64.91 kDa	None	None	L1_Md_F2	LINE1	WP_191862807.1	Reverse transcriptase domain-containing protein	68207 [Organism:] [Scientific Name: Streptomyces geysiriensis]	93.918	559	31	1	1	559	1	556	0.998214	0	1038	96.06		superfamily	413489	521	559	38	9.87e-10	58.8418	cl02808	RT_like superfamily	-
MSTRG.5619	chr12:90359115-90364115	MSTRG.5619.1	mono-exonic	MSTRG.5619.1_45	None	924	308	36.20 kDa	None	None	L1_Md_F2	LINE1	SHD82720.1	Retron-type Reverse transcriptase	83555 [Organism: Chlamydia abortus] Scientific Name: Chlamydia abortus]	93.16	307	21	0	1	307	414	720	0.996753	0	594	95.77		superfamily	413489	1	70	69	2.32e-08	53.449	cl02808	RT_like superfamily	-
MSTRG.5619	chr12:90359115-90364115	MSTRG.5619.1	mono-exonic	MSTRG.5619.1_54	None	552	184	21.69 kDa	None	None	L1_Md_F2	LINE1	CRH55776.1	L1 transposable element	813 [Organism: Chlamydia trachomatis] [Scientific Name: Chlamydia trachomatis]	95.628	183	8	0	1	183	1	183	0.994565	1.13e-125	361	97.81		superfamily	397235	3	100	97	3.3e-24	90.9956	cl25509	Transposase_22 superfamily	-
MSTRG.5619	chr12:90359115-90364115	MSTRG.5619.1	mono-exonic	MSTRG.5619.1_54	None	552	184	21.69 kDa	None	None	L1_Md_F2	LINE1	CRH55776.1	L1 transposable element	813 [Organism: Chlamydia trachomatis] [Scientific Name: Chlamydia trachomatis]	95.628	183	8	0	1	183	1	183	0.994565	1.13e-125	361	97.81		superfamily	407521	104	167	63	3.85e-12	58.5761	cl38762	Tnp_22_dsRBD superfamily	-
MSTRG.5903	chr12:113140529-113150018	MSTRG.5903.1	multi-exonic	MSTRG.5903.1_18	3' end	555	185	20.37 kDa	None	Exon overlap Crip2	None	None	NA	NA	NA	NA	NA	NA	NA	NA	NA	NA	NA	0	NA	NA	NA		NA	NA	NA	NA	0	NA	NA	NA	NA	NA
MSTRG.5903	chr12:113140529-113150018	MSTRG.5903.1	multi-exonic	MSTRG.5903.1_80	3' end	873	291	32.16 kDa	None	Exon overlap Crip2	None	None	EDL24587.1	mCG147836	10090 [Organism: house mouse] [Scientific Name: Mus musculus]	72.973	37	6	1	8	40	92	128	0.127148	9.6e-05	53.1	78.38		NA	NA	NA	NA	0	NA	NA	NA	NA	NA
MSTRG.5903	chr12:113140529-113150018	MSTRG.5903.1	multi-exonic	MSTRG.5903.1_89	3' end	510	170	18.72 kDa	None	Exon overlap Crip2	None	None	NA	NA	NA	NA	NA	NA	NA	NA	NA	NA	NA	0	NA	NA	NA		NA	NA	NA	NA	0	NA	NA	NA	NA	NA
MSTRG.5903	chr12:113140529-113150018	MSTRG.5903.1	multi-exonic	MSTRG.5903.1_112	3' end	462	154	16.32 kDa	None	Exon overlap Crip2	None	None	NA	NA	NA	NA	NA	NA	NA	NA	NA	NA	NA	0	NA	NA	NA		NA	NA	NA	NA	0	NA	NA	NA	NA	NA
MSTRG.5903	chr12:113140529-113150018	MSTRG.5903.1	multi-exonic	MSTRG.5903.1_124	3' end	765	255	27.25 kDa	None	Exon overlap Crip2	None	None	NA	NA	NA	NA	NA	NA	NA	NA	NA	NA	NA	0	NA	NA	NA		NA	NA	NA	NA	0	NA	NA	NA	NA	NA
MSTRG.5903	chr12:113140529-113150018	MSTRG.5903.1	multi-exonic	MSTRG.5903.1_125	3' end	492	164	17.38 kDa	None	Exon overlap Crip2	None	None	NA	NA	NA	NA	NA	NA	NA	NA	NA	NA	NA	0	NA	NA	NA		NA	NA	NA	NA	0	NA	NA	NA	NA	NA
MSTRG.5948	chr13:3610348-3619130	MSTRG.5948.1	mono-exonic	MSTRG.5948.1_103	5' end	723	241	27.12 kDa	None	Promoter overlap Tasor2	IAPEz-int	ERVK	XP_036021566.1	Gm54326	10090 [Organism: house mouse] [Scientific Name: Mus musculus]	90.299	134	9	1	74	203	16	149	0.556017	1.25e-67	229	93.28		NA	NA	NA	NA	0	NA	NA	NA	NA	NA
MSTRG.5948	chr13:3610348-3619130	MSTRG.5948.1	mono-exonic	MSTRG.5948.1_177	5' end	774	258	27.89 kDa	None	Promoter overlap Tasor2	IAPEz-int	ERVK	CRH56783.1	dUTP diphosphatase	813 [Organism: Chlamydia trachomatis] [Scientific Name: Chlamydia trachomatis]	95.703	256	11	0	1	256	3	258	0.992248	1.94e-164	466	96.88		specific	133149	121	206	85	7.32e-34	117.367	cd05482	HIV_retropepsin_like	cl11403
MSTRG.5948	chr13:3610348-3619130	MSTRG.5948.1	mono-exonic	MSTRG.5948.1_177	5' end	774	258	27.89 kDa	None	Promoter overlap Tasor2	IAPEz-int	ERVK	CRH56783.1	dUTP diphosphatase	813 [Organism: Chlamydia trachomatis] [Scientific Name: Chlamydia trachomatis]	95.703	256	11	0	1	256	3	258	0.992248	1.94e-164	466	96.88		superfamily	412409	2	91	89	7.91e-13	63.462	cl00493	trimeric_dUTPase superfamily	-
MSTRG.5948	chr13:3610348-3619130	MSTRG.5948.1	mono-exonic	MSTRG.5948.1_177	5' end	774	258	27.89 kDa	None	Promoter overlap Tasor2	IAPEz-int	ERVK	CRH56783.1	dUTP diphosphatase	813 [Organism: Chlamydia trachomatis] [Scientific Name: Chlamydia trachomatis]	95.703	256	11	0	1	256	3	258	0.992248	1.94e-164	466	96.88		specific	197727	222	257	35	1.29e-09	52.5474	smart00443	G_patch	cl02611
MSTRG.6055	chr13:21180478-21181089	MSTRG.6055.1	mono-exonic	MSTRG.6055.1_3	ORF overlap	525	175	19.09 kDa	Intron of Gm47806	Exon overlap Trim27	None	None	NA	NA	NA	NA	NA	NA	NA	NA	NA	NA	NA	0	NA	NA	NA		NA	NA	NA	NA	0	NA	NA	NA	NA	NA
MSTRG.6391	chr13:50509343-50674111	MSTRG.6391.2	multi-exonic	MSTRG.6391.2_162	None	495	165	17.67 kDa	Partial overlap to Gm31712 (not in ORFs)	None	None	None	NA	NA	NA	NA	NA	NA	NA	NA	NA	NA	NA	0	NA	NA	NA		NA	NA	NA	NA	0	NA	NA	NA	NA	NA
MSTRG.6391	chr13:50609929-50674111	MSTRG.6391.4	multi-exonic	MSTRG.6391.4_28	None	1005	335	37.70 kDa	None	None	None	None	XP_021035575.1	LOC110307673	10089 [Organism: Ryukyu mouse] [Scientific Name: Mus caroli]	82.879	257	43	1	1	256	317	573	0.767164	5.1e-143	427	89.11		NA	NA	NA	NA	0	NA	NA	NA	NA	NA
MSTRG.6391	chr13:50609929-50674111	MSTRG.6391.4	multi-exonic	MSTRG.6391.4_42	None	783	261	29.29 kDa	None	None	None	None	XP_006517007.1	Gm8765	10090 [Organism: house mouse] [Scientific Name: Mus musculus]	86.77	257	34	0	1	257	178	434	0.984674	6.7e-155	456	91.83		NA	NA	NA	NA	0	NA	NA	NA	NA	NA
MSTRG.6391	chr13:50609929-50674111	MSTRG.6391.4	multi-exonic	MSTRG.6391.4_57	None	816	272	29.71 kDa	None	None	None	None	NA	NA	NA	NA	NA	NA	NA	NA	NA	NA	NA	0	NA	NA	NA		NA	NA	NA	NA	0	NA	NA	NA	NA	NA
MSTRG.6391	chr13:50609929-50674111	MSTRG.6391.4	multi-exonic	MSTRG.6391.4_76	None	546	182	19.94 kDa	None	None	None	None	NA	NA	NA	NA	NA	NA	NA	NA	NA	NA	NA	0	NA	NA	NA		NA	NA	NA	NA	0	NA	NA	NA	NA	NA
MSTRG.6391	chr13:50637283-50674210	MSTRG.6391.5	multi-exonic	MSTRG.6391.5_145	None	561	187	20.83 kDa	None	None	RLTR10-int	ERVK	NA	NA	NA	NA	NA	NA	NA	NA	NA	NA	NA	0	NA	NA	NA		superfamily	395483	16	181	165	1.95e-33	117.647	cl02908	Gag_p24 superfamily	-
MSTRG.6391	chr13:50637283-50674210	MSTRG.6391.5	multi-exonic	MSTRG.6391.5_426	None	504	168	18.73 kDa	None	None	RLTR10-int	ERVK	NA	NA	NA	NA	NA	NA	NA	NA	NA	NA	NA	0	NA	NA	NA		NA	NA	NA	NA	0	NA	NA	NA	NA	NA
MSTRG.6391	chr13:50637283-50674210	MSTRG.6391.5	multi-exonic	MSTRG.6391.5_502	None	1023	341	38.03 kDa	None	None	RLTR10-int	ERVK	NA	NA	NA	NA	NA	NA	NA	NA	NA	NA	NA	0	NA	NA	NA		superfamily	417494	160	285	125	3.69e-31	114.358	cl14782	RNase_H_like superfamily	-
MSTRG.6391	chr13:50637283-50674210	MSTRG.6391.5	multi-exonic	MSTRG.6391.5_502	None	1023	341	38.03 kDa	None	None	RLTR10-int	ERVK	NA	NA	NA	NA	NA	NA	NA	NA	NA	NA	NA	0	NA	NA	NA		specific	396557	295	330	35	5.77e-08	48.0799	pfam02022	Integrase_Zn	cl08339
MSTRG.6398	chr13:50844446-50934555	MSTRG.6398.1	multi-exonic	MSTRG.6398.1_2	None	339	1136	127.34 kDa	None	Within intron of MSTRG.6397	None	None	XP_034365777.1	Spata31A6l (spermatogenesis-associated protein 31A6-like; LOC117713595)	61156 [Organism: African grass rat] [Scientific Name: Arvicanthis niloticus]	63.644	1136	398	6	1	1134	1	1123	10.0531	0	1294	73.94		superfamily	405353	128	434	306	7.31e-20	93.1496	cl20612	FAM75 superfamily	-
MSTRG.6398	chr13:50854918-50934555	MSTRG.6398.2	multi-exonic	MSTRG.6398.2_67	None	3345	1115	125.07 kDa	None	Within intron of MSTRG.6397	None	None	XP_034365777.1	Spata31A6l (spermatogenesis-associated protein 31A6-like; LOC117713595)	61156 [Organism: African grass rat] [Scientific Name: Arvicanthis niloticus]	63.163	1056	374	6	61	1114	81	1123	0.947085	0	1230	73.58		superfamily	405353	108	414	306	8.65e-20	92.7644	cl20612	FAM75 superfamily	-
MSTRG.6523	chr13:58139680-58146882	MSTRG.6523.1	multi-exonic	MSTRG.6523.1_4	None	1734	578	63.88 kDa	None	Exon overlap Gm40694	MMERVK10c-int	ERVK	NA	NA	NA	NA	NA	NA	NA	NA	NA	NA	NA	0	NA	NA	NA		superfamily	413513	377	549	172	4.17e-05	44.5884	cl02885	Ebola_HIV-1-like_HR1-HR2 superfamily	-
MSTRG.6645	chr13:65950584-65960460	MSTRG.6645.1	multi-exonic	MSTRG.6645.1_4	None	1086	362	42.25 kDa	Gm46425 (XM_017315682.1) - different ORF	Promoter overlap MSTRG.6644	MMSAT4	Satellite	XP_017171189.2	Gm10323	10090 [Organism: house mouse] [Scientific Name: Mus musculus]	84.722	360	52	1	1	360	20	376	0.994475	0	602	90.83		specific	396083	2	25	23	3.77e-09	51.6339	pfam01352	KRAB	cl02581
MSTRG.6645	chr13:65950584-65960460	MSTRG.6645.1	multi-exonic	MSTRG.6645.1_4	None	1086	362	42.25 kDa	Gm46425 (XM_017315682.1) - different ORF	Promoter overlap MSTRG.6644	MMSAT4	Satellite	XP_017171189.2	Gm10323	10090 [Organism: house mouse] [Scientific Name: Mus musculus]	84.722	360	52	1	1	360	20	376	0.994475	0	602	90.83		specific	227381	46	243	197	4.07e-09	57.7834	COG5048	COG5048	cl34881
MSTRG.6645	chr13:65950584-65960460	MSTRG.6645.1	multi-exonic	MSTRG.6645.1_4	None	1086	362	42.25 kDa	Gm46425 (XM_017315682.1) - different ORF	Promoter overlap MSTRG.6644	MMSAT4	Satellite	XP_017171189.2	Gm10323	10090 [Organism: house mouse] [Scientific Name: Mus musculus]	84.722	360	52	1	1	360	20	376	0.994475	0	602	90.83		specific	227381	166	327	161	1.5e-08	55.8574	COG5048	COG5048	cl34881
MSTRG.6645	chr13:65950584-65960460	MSTRG.6645.1	multi-exonic	MSTRG.6645.1_4	None	1086	362	42.25 kDa	Gm46425 (XM_017315682.1) - different ORF	Promoter overlap MSTRG.6644	MMSAT4	Satellite	XP_017171189.2	Gm10323	10090 [Organism: house mouse] [Scientific Name: Mus musculus]	84.722	360	52	1	1	360	20	376	0.994475	0	602	90.83		specific	404364	323	347	24	0.001694	35.4025	pfam13465	zf-H2C2_2	cl22375
MSTRG.6645	chr13:65950584-65960460	MSTRG.6645.1	multi-exonic	MSTRG.6645.1_28	None	1011	337	38.28 kDa	Gm46425 (XM_017315682.1) - different ORF	Promoter overlap MSTRG.6644	MMSAT4	Satellite	XP_036013675.1	Gm53268	10090 [Organism: house mouse] [Scientific Name: Mus musculus]	65.101	298	104	0	1	298	61	358	0.884273	1.09e-103	319	76.85		NA	NA	NA	NA	0	NA	NA	NA	NA	NA
MSTRG.6813	chr13:86457271-86565855	MSTRG.6813.1	multi-exonic	MSTRG.6813.1_26	None	753	251	29.95 kDa	None	Exon overlap MSTRG.6814	L1_Md_F2	LINE1	SFW04367.1	Retron-type Reverse transcriptase	83555 [Organism: Chlamydia abortus] Scientific Name: Chlamydia abortus]	97.436	234	6	0	17	250	57	290	0.932271	6.6e-165	469	97.86		NA	NA	NA	NA	0	NA	NA	NA	NA	NA
MSTRG.6818	chr13:87838469-87842598	MSTRG.6818.1	mono-exonic	MSTRG.6818.1_66	None	906	302	35.39 kDa	None	None	L1_Md_F2	LINE1	NA	NA	NA	NA	NA	NA	NA	NA	NA	NA	NA	0	NA	NA	NA		superfamily	412407	20	122	102	3.9e-21	89.7181	cl00490	EEP superfamily	-
MSTRG.6818	chr13:87838469-87842598	MSTRG.6818.1	mono-exonic	MSTRG.6818.1_74	None	1254	418	49.62 kDa	None	None	L1_Md_F2	LINE1	NA	NA	NA	NA	NA	NA	NA	NA	NA	NA	NA	0	NA	NA	NA		NA	NA	NA	NA	0	NA	NA	NA	NA	NA
MSTRG.7273	chr14:15110439-15168037	MSTRG.7273.1	multi-exonic	MSTRG.7273.1_267	None	1050	350	41.17 kDa	None	Exon overlap Gm47758	L1_Mus2	LINE1	NA	NA	NA	NA	NA	NA	NA	NA	NA	NA	NA	0	NA	NA	NA		superfamily	412407	3	79	76	1.03e-10	60.8281	cl00490	EEP superfamily	-
MSTRG.7273	chr14:15110439-15168037	MSTRG.7273.1	multi-exonic	MSTRG.7273.1_651	None	483	161	18.23 kDa	None	Exon overlap Gm47758	None	None	NA	NA	NA	NA	NA	NA	NA	NA	NA	NA	NA	0	NA	NA	NA		NA	NA	NA	NA	0	NA	NA	NA	NA	NA
MSTRG.7273	chr14:15110439-15168037	MSTRG.7273.1	multi-exonic	MSTRG.7273.1_816	None	495	165	19.39 kDa	None	Exon overlap Gm47758	L1_Mus2	LINE1	NA	NA	NA	NA	NA	NA	NA	NA	NA	NA	NA	0	NA	NA	NA		superfamily	397235	3	95	92	1.55e-21	83.2916	cl25509	Transposase_22 superfamily	-
MSTRG.7273	chr14:15110439-15168037	MSTRG.7273.1	multi-exonic	MSTRG.7273.1_816	None	495	165	19.39 kDa	None	Exon overlap Gm47758	L1_Mus2	LINE1	NA	NA	NA	NA	NA	NA	NA	NA	NA	NA	NA	0	NA	NA	NA		superfamily	407521	99	161	62	4.11e-11	55.4945	cl38762	Tnp_22_dsRBD superfamily	-
MSTRG.7914	chr14:60478836-60485706	MSTRG.7914.1	mono-exonic	MSTRG.7914.1_131	None	501	167	18.45 kDa		Promoter overlap Spata13	RLTR26_Mus	ERVK	NA	NA	NA	NA	NA	NA	NA	NA	NA	NA	NA	0	NA	NA	NA		NA	NA	NA	NA	0	NA	NA	NA	NA	NA
MSTRG.8149	chr14:76571002-76576232	MSTRG.8149.1	mono-exonic	MSTRG.8149.1_22	None	1770	590	69.53 kDa	None	None	L1_Md_F2	LINE1	NA	NA	NA	NA	NA	NA	NA	NA	NA	NA	NA	0	NA	NA	NA		specific	238827	7	123	116	1.24e-28	113.54	cd01650	RT_nLTR_like	cl02808
MSTRG.8149	chr14:76571002-76576232	MSTRG.8149.1	mono-exonic	MSTRG.8149.1_40	None	546	182	20.42 kDa	None	None	None	None	NA	NA	NA	NA	NA	NA	NA	NA	NA	NA	NA	0	NA	NA	NA		NA	NA	NA	NA	0	NA	NA	NA	NA	NA
MSTRG.9133	chr15:82852791-82898324	MSTRG.9133.1	mono-exonic	MSTRG.9133.1_233	None	570	190	20.84 kDa	None	Promoter overlap Tcf20	None	None	NA	NA	NA	NA	NA	NA	NA	NA	NA	NA	NA	0	NA	NA	NA		NA	NA	NA	NA	0	NA	NA	NA	NA	NA
MSTRG.9215	chr15:86702917-86706445	MSTRG.9215.1	multi-exonic	MSTRG.9215.1_3	None	519	173	17.27 kDa	None	Exon overlap Gm49464	L1M3e	LINE1	NA	NA	NA	NA	NA	NA	NA	NA	NA	NA	NA	0	NA	NA	NA		NA	NA	NA	NA	0	NA	NA	NA	NA	NA
MSTRG.9321	chr15:94118325-94131619	MSTRG.9321.1	mono-exonic	MSTRG.9321.1_74	None	759	253	29.56 kDa	None	Within intron of MSTRG.9320	L1Md_T	LINE1	NA	NA	NA	NA	NA	NA	NA	NA	NA	NA	NA	0	NA	NA	NA		superfamily	413489	188	252	64	1.07e-20	86.9614	cl02808	RT_like superfamily	-
MSTRG.9321	chr15:94118325-94131619	MSTRG.9321.1	mono-exonic	MSTRG.9321.1_76	None	798	266	30.75 kDa	None	Within intron of MSTRG.9320	L1Md_T	LINE1	NA	NA	NA	NA	NA	NA	NA	NA	NA	NA	NA	0	NA	NA	NA		superfamily	413489	1	70	69	7.62e-07	48.4414	cl02808	RT_like superfamily	-
MSTRG.9321	chr15:94118325-94131619	MSTRG.9321.1	mono-exonic	MSTRG.9321.1_115	None	468	156	17.95 kDa	None	Within intron of MSTRG.9320	None	None	NA	NA	NA	NA	NA	NA	NA	NA	NA	NA	NA	0	NA	NA	NA		NA	NA	NA	NA	0	NA	NA	NA	NA	NA
MSTRG.9321	chr15:94118325-94131619	MSTRG.9321.1	mono-exonic	MSTRG.9321.1_148	None	813	271	31.18 kDa	None	Within intron of MSTRG.9320	L1Md_T	LINE1	NA	NA	NA	NA	NA	NA	NA	NA	NA	NA	NA	0	NA	NA	NA		superfamily	397235	196	263	67	6.31e-09	52.4757	cl25509	Transposase_22 superfamily	-
MSTRG.9321	chr15:94118325-94131619	MSTRG.9321.1	mono-exonic	MSTRG.9321.1_148	None	813	271	31.18 kDa	None	Within intron of MSTRG.9320	L1Md_T	LINE1	NA	NA	NA	NA	NA	NA	NA	NA	NA	NA	NA	0	NA	NA	NA		superfamily	224117	79	233	154	0.000121005	43.1644	cl34174	Smc superfamily	-
MSTRG.9321	chr15:94118325-94131619	MSTRG.9321.1	mono-exonic	MSTRG.9321.1_151	None	1041	347	40.09 kDa	None	Within intron of MSTRG.9320	L1Md_T	LINE1	NA	NA	NA	NA	NA	NA	NA	NA	NA	NA	NA	0	NA	NA	NA		specific	197310	17	242	225	1.96e-61	196.418	cd09076	L1-EN	cl00490
MSTRG.9321	chr15:94118325-94131619	MSTRG.9321.1	mono-exonic	MSTRG.9321.1_263	None	654	218	25.81 kDa	None	Within intron of MSTRG.9320	L1Md_T	LINE1	NA	NA	NA	NA	NA	NA	NA	NA	NA	NA	NA	0	NA	NA	NA		NA	NA	NA	NA	0	NA	NA	NA	NA	NA
MSTRG.9611	chr16:10218196-10223460	MSTRG.9611.1	mono-exonic	MSTRG.9611.1_1	None	552	184	21.52 kDa	Within intron of Gm49455	Within intron of Atf7ip2	L1Md_F3	LINE1	NA	NA	NA	NA	NA	NA	NA	NA	NA	NA	NA	0	NA	NA	NA		superfamily	397235	3	100	97	6.04e-24	90.2252	cl25509	Transposase_22 superfamily	-
MSTRG.9611	chr16:10218196-10223460	MSTRG.9611.1	mono-exonic	MSTRG.9611.1_1	None	552	184	21.52 kDa	Within intron of Gm49455	Within intron of Atf7ip2	L1Md_F3	LINE1	NA	NA	NA	NA	NA	NA	NA	NA	NA	NA	NA	0	NA	NA	NA		superfamily	407521	104	167	63	5.47e-10	53.1833	cl38762	Tnp_22_dsRBD superfamily	-
MSTRG.9611	chr16:10218196-10223460	MSTRG.9611.1	mono-exonic	MSTRG.9611.1_42	None	687	229	26.52 kDa	Within intron of Gm49455	Within intron of Atf7ip2	L1Md_F3	LINE1	NA	NA	NA	NA	NA	NA	NA	NA	NA	NA	NA	0	NA	NA	NA		NA	NA	NA	NA	0	NA	NA	NA	NA	NA
MSTRG.9611	chr16:10218196-10223460	MSTRG.9611.1	mono-exonic	MSTRG.9611.1_45	None	1002	334	38.70 kDa	Within intron of Gm49455	Within intron of Atf7ip2	L1Md_F3	LINE1	NA	NA	NA	NA	NA	NA	NA	NA	NA	NA	NA	0	NA	NA	NA		specific	238827	1	258	257	1.32e-59	190.58	cd01650	RT_nLTR_like	cl02808
MSTRG.9660	chr16:13754515-13815512	MSTRG.9660.1	multi-exonic	MSTRG.9660.1_2	5' end	1932	644	69.99 kDa	None	None	None	None	NA	NA	NA	NA	NA	NA	NA	NA	NA	NA	NA	0	NA	NA	NA		specific	405761	30	92	62	2.51e-36	130.071	pfam15125	TMEM238	cl20994
MSTRG.9660	chr16:13754515-13815512	MSTRG.9660.1	multi-exonic	MSTRG.9660.2_2	5' end	1932	644	69.99 kDa	None	None	None	None	NA	NA	NA	NA	NA	NA	NA	NA	NA	NA	NA	0	NA	NA	NA		specific	405761	30	92	62	2.51e-36	130.071	pfam15125	TMEM238	cl20994
MSTRG.9660	chr16:13754515-13815512	MSTRG.9660.1	multi-exonic	MSTRG.9660.1_59	5' end	1911	637	72.69 kDa	None	None	None	None	NA	NA	NA	NA	NA	NA	NA	NA	NA	NA	NA	0	NA	NA	NA		specific	398805	42	561	519	3.28e-134	403.938	pfam05327	RRN3	cl05076
MSTRG.9660	chr16:13754515-13815512	MSTRG.9660.3	multi-exonic	MSTRG.9660.3_35	5' end	1971	657	74.53 kDa	Rrn3	Promoter overlap MSTRG.9661	None	None	NA	NA	NA	NA	NA	NA	NA	NA	NA	NA	NA	0	NA	NA	NA		specific	398805	62	581	519	3.9e-134	404.323	pfam05327	RRN3	cl05076
MSTRG.10146	chr16:68963727-68968770	MSTRG.10146.1	mono-exonic	MSTRG.10146.1_41	None	489	163	19.01 kDa	None	None	L1Md_F3	LINE1	NA	NA	NA	NA	NA	NA	NA	NA	NA	NA	NA	0	NA	NA	NA		superfamily	397235	1	79	78	5.44e-20	79.4396	cl25509	Transposase_22 superfamily	-
MSTRG.10146	chr16:68963727-68968770	MSTRG.10146.1	mono-exonic	MSTRG.10146.1_41	None	489	163	19.01 kDa	None	None	L1Md_F3	LINE1	NA	NA	NA	NA	NA	NA	NA	NA	NA	NA	NA	0	NA	NA	NA		superfamily	407521	83	146	63	1.73e-09	51.2573	cl38762	Tnp_22_dsRBD superfamily	-
MSTRG.10146	chr16:68963727-68968770	MSTRG.10146.1	mono-exonic	MSTRG.10146.1_48	None	555	185	21.55 kDa	None	None	L1Md_F3	LINE1	NA	NA	NA	NA	NA	NA	NA	NA	NA	NA	NA	0	NA	NA	NA		superfamily	413489	1	70	69	9.9e-09	52.6786	cl02808	RT_like superfamily	-
MSTRG.10146	chr16:68963727-68968770	MSTRG.10146.1	mono-exonic	MSTRG.10146.1_68	None	705	235	26.86 kDa	None	None	L1Md_F3	LINE1	NA	NA	NA	NA	NA	NA	NA	NA	NA	NA	NA	0	NA	NA	NA		specific	197310	17	234	217	5.92e-54	173.306	cd09076	L1-EN	cl00490
MSTRG.10146	chr16:68963727-68968770	MSTRG.10146.1	mono-exonic	MSTRG.10146.1_84	None	525	175	20.82 kDa	None	None	L1Md_F3	LINE1	NA	NA	NA	NA	NA	NA	NA	NA	NA	NA	NA	0	NA	NA	NA		NA	NA	NA	NA	0	NA	NA	NA	NA	NA
MSTRG.10147	chr16:69087762-69099356	MSTRG.10147.1	mono-exonic	MSTRG.10147.1_109	None	669	223	25.14 kDa	None	None	MMERVK10c-int	ERVK	NA	NA	NA	NA	NA	NA	NA	NA	NA	NA	NA	0	NA	NA	NA		specific	395538	2	96	94	3.48e-23	89.3072	pfam00665	rve	cl21549
MSTRG.10147	chr16:69087762-69099356	MSTRG.10147.1	mono-exonic	MSTRG.10147.1_109	None	669	223	25.14 kDa	None	None	MMERVK10c-int	ERVK	NA	NA	NA	NA	NA	NA	NA	NA	NA	NA	NA	0	NA	NA	NA		superfamily	395437	163	206	43	1.8e-10	54.3204	cl02895	IN_DBD_C superfamily	-
MSTRG.10147	chr16:69087762-69099356	MSTRG.10147.1	mono-exonic	MSTRG.10147.1_114	None	528	176	19.90 kDa	None	None	MMERVK10c-int	ERVK	NA	NA	NA	NA	NA	NA	NA	NA	NA	NA	NA	0	NA	NA	NA		NA	NA	NA	NA	0	NA	NA	NA	NA	NA
MSTRG.10147	chr16:69087762-69099356	MSTRG.10147.1	mono-exonic	MSTRG.10147.1_257	None	462	154	18.14 kDa	None	None	Lx7	LINE1	NA	NA	NA	NA	NA	NA	NA	NA	NA	NA	NA	0	NA	NA	NA		NA	NA	NA	NA	0	NA	NA	NA	NA	NA
MSTRG.10225	chr16:86170934-86174578	MSTRG.10225.1	multi-exonic	MSTRG.10225.1_23	None	765	255	29.13 kDa	None	None	L1Md_T	LINE1	NA	NA	NA	NA	NA	NA	NA	NA	NA	NA	NA	0	NA	NA	NA		superfamily	224117	66	206	140	0.000315649	41.6236	cl34174	Smc superfamily	-
MSTRG.10305	chr16:91561073-91565072	MSTRG.10305.1	multi-exonic	MSTRG.10305.1_3	3' end	651	217	23.56 kDa	None	Exon overlap Ifngr2	None	None	NA	NA	NA	NA	NA	NA	NA	NA	NA	NA	NA	0	NA	NA	NA		NA	NA	NA	NA	0	NA	NA	NA	NA	NA
MSTRG.10450	chr17:6491853-6494278	MSTRG.10450.1	mono-exonic	MSTRG.10450.1_36	5' end	798	266	29.63 kDa	None	None	None	None	NP_080076.1	Ppp1r2	10090 [Organism: house mouse] [Scientific Name: Mus musculus]	97.087	206	6	0	60	265	1	206	0.774436	2.11e-128	373	98.06	yes: Ppp1r2-ps6 (Origin gene: Ppp1r2, chr6:31,070,359-31,094,095)	specific	398578	105	224	119	6.39e-50	160.297	pfam04979	IPP-2	cl04871
MSTRG.10590	chr17:17204416-17206872	MSTRG.10590.1	mono-exonic	MSTRG.10590.1_1	None	1569	523	60.53 kDa	Gm38396 (XM_030249939.1) (Larger ORF)	None	MurSatRep1	Unknown	NA	NA	NA	NA	NA	NA	NA	NA	NA	NA	NA	0	NA	NA	NA		specific	227381	45	450	405	5.66e-13	70.8802	COG5048	COG5048	cl34881
MSTRG.10590	chr17:17204416-17206872	MSTRG.10590.1	mono-exonic	MSTRG.10590.1_1	None	1569	523	60.53 kDa	Gm38396 (XM_030249939.1) (Larger ORF)	None	MurSatRep1	Unknown	NA	NA	NA	NA	NA	NA	NA	NA	NA	NA	NA	0	NA	NA	NA		superfamily	227381	423	503	80	0.000835837	41.9902	cl34881	COG5048 superfamily	-
MSTRG.10590	chr17:17204416-17206872	MSTRG.10590.1	mono-exonic	MSTRG.10590.1_9	None	474	158	18.13 kDa	Gm38396 (XM_030249939.1) (Larger ORF)	None	MurSatRep1	Unknown	NA	NA	NA	NA	NA	NA	NA	NA	NA	NA	NA	0	NA	NA	NA		NA	NA	NA	NA	0	NA	NA	NA	NA	NA
MSTRG.10590	chr17:17204416-17206872	MSTRG.10590.1	mono-exonic	MSTRG.10590.1_12	None	723	241	27.70 kDa	Gm38396 (XM_030249939.1) (Larger ORF)	None	MurSatRep1	Unknown	NA	NA	NA	NA	NA	NA	NA	NA	NA	NA	NA	0	NA	NA	NA		NA	NA	NA	NA	0	NA	NA	NA	NA	NA
MSTRG.10624	chr17:22497320-22547366	MSTRG.10624.1	multi-exonic	MSTRG.10624.1_233	None	456	152	17.04 kDa	None	Promoter overlap Vmn2r111	None	None	NA	NA	NA	NA	NA	NA	NA	NA	NA	NA	NA	0	NA	NA	NA		superfamily	413489	42	140	98	1.61e-22	88.8874	cl02808	RT_like superfamily	-
MSTRG.10624	chr17:22497320-22547366	MSTRG.10624.1	multi-exonic	MSTRG.10624.1_243	None	513	171	19.92 kDa	None	Promoter overlap Vmn2r111	None	None	NA	NA	NA	NA	NA	NA	NA	NA	NA	NA	NA	0	NA	NA	NA		NA	NA	NA	NA	0	NA	NA	NA	NA	NA
MSTRG.10624	chr17:22497320-22547366	MSTRG.10624.1	multi-exonic	MSTRG.10624.1_326	None	525	175	19.71 kDa	None	Promoter overlap Vmn2r111	None	None	NA	NA	NA	NA	NA	NA	NA	NA	NA	NA	NA	0	NA	NA	NA		superfamily	235600	49	150	101	0.00194026	37.9848	cl35381	PRK05771 superfamily	-
MSTRG.10624	chr17:22497320-22547366	MSTRG.10624.5	multi-exonic	MSTRG.10624.5_14	None	525	175	19.71 kDa	None	Promoter overlap Vmn2r111	None	None	NA	NA	NA	NA	NA	NA	NA	NA	NA	NA	NA	0	NA	NA	NA		superfamily	235600	49	150	101	0.00194026	37.9848	cl35381	PRK05771 superfamily	-
MSTRG.10624	chr17:22497320-22547366	MSTRG.10624.5	multi-exonic	MSTRG.10624.5_125	None	456	152	17.04 kDa	None	Promoter overlap Vmn2r111	None	None	NA	NA	NA	NA	NA	NA	NA	NA	NA	NA	NA	0	NA	NA	NA		superfamily	413489	42	140	98	1.61e-22	88.8874	cl02808	RT_like superfamily	-
MSTRG.10624	chr17:22497320-22547366	MSTRG.10624.5	multi-exonic	MSTRG.10624.5_135	None	513	171	19.92 kDa	None	Promoter overlap Vmn2r111	None	None	NA	NA	NA	NA	NA	NA	NA	NA	NA	NA	NA	0	NA	NA	NA		NA	NA	NA	NA	0	NA	NA	NA	NA	NA
MSTRG.10748	chr17:26087141-26091252	MSTRG.10748.1	mono-exonic	MSTRG.10748.1_24	None	687	229	25.16 kDa	None	Exon overlap Decr2	None	None	NA	NA	NA	NA	NA	NA	NA	NA	NA	NA	NA	0	NA	NA	NA		NA	NA	NA	NA	0	NA	NA	NA	NA	NA
MSTRG.10748	chr17:26087141-26091252	MSTRG.10748.2	mono-exonic	MSTRG.10748.2_64	None	822	274	30.27 kDa	None	Exon overlap Decr2	None	None	NA	NA	NA	NA	NA	NA	NA	NA	NA	NA	NA	0	NA	NA	NA		NA	NA	NA	NA	0	NA	NA	NA	NA	NA
MSTRG.10924	chr17:33139299-33157854	MSTRG.10924.1	multi-exonic	MSTRG.10924.1_105	None	1182	394	45.82 kDa	Gm52288 (XR_003952262.1) non-coding	Promoter overlap Morc2b	L1Md_F2	LINE1	P11369.2	ORF2p	10090 [Organism: house mouse] [Scientific Name: Mus musculus]	91.837	392	32	0	2	393	165	556	0.994924	0	709	94.9		superfamily	412407	1	79	78	1.36e-14	72.7693	cl00490	EEP superfamily	-
MSTRG.10924	chr17:33139299-33157854	MSTRG.10924.1	multi-exonic	MSTRG.10924.1_105	None	1182	394	45.82 kDa	Gm52288 (XR_003952262.1) non-coding	Promoter overlap Morc2b	L1Md_F2	LINE1	P11369.2	ORF2p	10090 [Organism: house mouse] [Scientific Name: Mus musculus]	91.837	392	32	0	2	393	165	556	0.994924	0	709	94.9		superfamily	413489	355	393	38	3.62e-10	59.227	cl02808	RT_like superfamily	-
MSTRG.10924	chr17:33139299-33157854	MSTRG.10924.1	multi-exonic	MSTRG.10924.1_165	None	555	185	21.75 kDa	Gm52288 (XR_003952262.1) non-coding	Promoter overlap Morc2b	None	None	AAO17387.1	Gm21062	10090 [Organism: house mouse] [Scientific Name: Mus musculus]	77.778	189	18	2	18	184	34	220	1.02162	3.5e-91	282	80.42		specific	404364	159	180	21	0.00251952	34.2469	pfam13465	zf-H2C2_2	cl22375
MSTRG.10924	chr17:33139299-33157854	MSTRG.10924.1	multi-exonic	MSTRG.10924.1_167	None	456	152	17.40 kDa	Gm52288 (XR_003952262.1) non-coding	Promoter overlap Morc2b	None	None	EDL40268.1	mCG125468	10090 [Organism: house mouse] [Scientific Name: Mus musculus]	100	151	0	0	1	151	1	151	0.993421	3.89e-106	309	100		NA	NA	NA	NA	0	NA	NA	NA	NA	NA
MSTRG.10924	chr17:33139299-33157854	MSTRG.10924.1	multi-exonic	MSTRG.10924.1_237	None	513	171	20.09 kDa	Gm52288 (XR_003952262.1) non-coding	Promoter overlap Morc2b	L1Md_F2	LINE1	SFW05840.1	Retron-type Reverse transcriptase	83555 [Organism: Chlamydia abortus] Scientific Name: Chlamydia abortus]	89.412	170	17	1	1	169	124	293	0.994152	1.96e-108	322	94.12		NA	NA	NA	NA	0	NA	NA	NA	NA	NA
MSTRG.10924	chr17:33139299-33157854	MSTRG.10924.1	multi-exonic	MSTRG.10924.1_286	None	453	151	17.67 kDa	Gm52288 (XR_003952262.1) non-coding	Promoter overlap Morc2b	None	None	XP_047388446.1	Zinc finger protein 844-like (LOC124969517)	30640 [Organism: gray squirrel] [Scientific Name: Neosciurus carolinensis]	39.86	143	86	0	1	143	93	235	0.94702	1.22e-22	102	57.34		NA	NA	NA	NA	0	NA	NA	NA	NA	NA
MSTRG.10924	chr17:33139299-33157854	MSTRG.10924.1	multi-exonic	MSTRG.10924.1_318	None	735	245	28.02 kDa	Gm52288 (XR_003952262.1) non-coding	Promoter overlap Morc2b	L1Md_F2	LINE1	SFW05975.1	L1 transposable element	83555 [Organism: Chlamydia abortus] Scientific Name: Chlamydia abortus]	84	250	34	1	1	244	1	250	1.02041	1.93e-146	422	92		superfamily	397235	185	241	56	6.22e-07	46.3125	cl25509	Transposase_22 superfamily	-
MSTRG.10924	chr17:33139299-33157854	MSTRG.10924.1	multi-exonic	MSTRG.10924.1_318	None	735	245	28.02 kDa	Gm52288 (XR_003952262.1) non-coding	Promoter overlap Morc2b	L1Md_F2	LINE1	SFW05975.1	L1 transposable element	83555 [Organism: Chlamydia abortus] Scientific Name: Chlamydia abortus]	84	250	34	1	1	244	1	250	1.02041	1.93e-146	422	92		superfamily	237177	50	177	127	1.13e-05	45.9246	cl36166	PRK12704 superfamily	-
MSTRG.10924	chr17:33139299-33157854	MSTRG.10924.1	multi-exonic	MSTRG.10924.1_331	None	537	179	20.71 kDa	Gm52288 (XR_003952262.1) non-coding	Promoter overlap Morc2b	L1Md_F2	LINE1	WP_206600885.1	Reverse transcriptase domain-containing protein	83555 [Organism: Chlamydia abortus] Scientific Name: Chlamydia abortus]	88.268	179	20	1	1	178	11	189	1	5.28e-110	322	95.53		superfamily	413489	1	70	69	6.24e-09	53.0638	cl02808	RT_like superfamily	-
MSTRG.10924	chr17:33139299-33157854	MSTRG.10924.2	multi-exonic	MSTRG.10924.2_99	None	1182	394	45.82 kDa	Gm52288 (XR_003952262.1) non-coding	Promoter overlap Morc2b	L1Md_F2	LINE1	P11369.2	ORF2p	10090 [Organism: house mouse] [Scientific Name: Mus musculus]	91.837	392	32	0	2	393	165	556	0.994924	0	709	94.9		superfamily	412407	1	79	78	1.36e-14	72.7693	cl00490	EEP superfamily	-
MSTRG.10924	chr17:33139299-33157854	MSTRG.10924.2	multi-exonic	MSTRG.10924.2_99	None	1182	394	45.82 kDa	Gm52288 (XR_003952262.1) non-coding	Promoter overlap Morc2b	L1Md_F2	LINE1	P11369.2	ORF2p	10090 [Organism: house mouse] [Scientific Name: Mus musculus]	91.837	392	32	0	2	393	165	556	0.994924	0	709	94.9		superfamily	413489	355	393	38	3.62e-10	59.227	cl02808	RT_like superfamily	-
MSTRG.10924	chr17:33139299-33157854	MSTRG.10924.2	multi-exonic	MSTRG.10924.2_148	None	555	185	21.75 kDa	Gm52288 (XR_003952262.1) non-coding	Promoter overlap Morc2b	None	None	AAO17387.1	Gm21062	10090 [Organism: house mouse] [Scientific Name: Mus musculus]	77.778	189	18	2	18	184	34	220	1.02162	3.5e-91	282	80.42		specific	404364	159	180	21	0.00251952	34.2469	pfam13465	zf-H2C2_2	cl22375
MSTRG.10924	chr17:33139299-33157854	MSTRG.10924.2	multi-exonic	MSTRG.10924.2_150	None	456	152	17.40 kDa	Gm52288 (XR_003952262.1) non-coding	Promoter overlap Morc2b	None	None	EDL40268.1	mCG125468	10090 [Organism: house mouse] [Scientific Name: Mus musculus]	100	151	0	0	1	151	1	151	0.993421	3.89e-106	309	100		NA	NA	NA	NA	0	NA	NA	NA	NA	NA
MSTRG.10924	chr17:33139299-33157854	MSTRG.10924.2	multi-exonic	MSTRG.10924.2_220	None	513	171	20.09 kDa	Gm52288 (XR_003952262.1) non-coding	Promoter overlap Morc2b	L1Md_F2	LINE1	SFW05840.1	Retron-type Reverse transcriptase	83555 [Organism: Chlamydia abortus] Scientific Name: Chlamydia abortus]	89.412	170	17	1	1	169	124	293	0.994152	1.96e-108	322	94.12		NA	NA	NA	NA	0	NA	NA	NA	NA	NA
MSTRG.10924	chr17:33139299-33157854	MSTRG.10924.2	multi-exonic	MSTRG.10924.2_275	None	453	151	17.67 kDa	Gm52288 (XR_003952262.1) non-coding	Promoter overlap Morc2b	None	None	XP_047388446.1	Zinc finger protein 844-like (LOC124969517)	30640 [Organism: gray squirrel] [Scientific Name: Neosciurus carolinensis]	39.86	143	86	0	1	143	93	235	0.94702	1.22e-22	102	57.34		NA	NA	NA	NA	0	NA	NA	NA	NA	NA
MSTRG.10924	chr17:33139299-33157854	MSTRG.10924.2	multi-exonic	MSTRG.10924.2_307	None	735	245	28.02 kDa	Gm52288 (XR_003952262.1) non-coding	Promoter overlap Morc2b	L1Md_F2	LINE1	SFW05975.1	L1 transposable element	83555 [Organism: Chlamydia abortus] Scientific Name: Chlamydia abortus]	84	250	34	1	1	244	1	250	1.02041	1.93e-146	422	92		superfamily	397235	185	241	56	6.22e-07	46.3125	cl25509	Transposase_22 superfamily	-
MSTRG.10924	chr17:33139299-33157854	MSTRG.10924.2	multi-exonic	MSTRG.10924.2_307	None	735	245	28.02 kDa	Gm52288 (XR_003952262.1) non-coding	Promoter overlap Morc2b	L1Md_F2	LINE1	SFW05975.1	L1 transposable element	83555 [Organism: Chlamydia abortus] Scientific Name: Chlamydia abortus]	84	250	34	1	1	244	1	250	1.02041	1.93e-146	422	92		superfamily	237177	50	177	127	1.13e-05	45.9246	cl36166	PRK12704 superfamily	-
MSTRG.10924	chr17:33139299-33157854	MSTRG.10924.2	multi-exonic	MSTRG.10924.2_320	None	537	179	20.71 kDa	Gm52288 (XR_003952262.1) non-coding	Promoter overlap Morc2b	L1Md_F2	LINE1	WP_206600885.1	Reverse transcriptase domain-containing protein	83555 [Organism: Chlamydia abortus] Scientific Name: Chlamydia abortus]	88.268	179	20	1	1	178	11	189	1	5.28e-110	322	95.53		superfamily	413489	1	70	69	6.24e-09	53.0638	cl02808	RT_like superfamily	-
MSTRG.11073	chr17:37635479-37639103	MSTRG.11073.1	multi-exonic	MSTRG.11073.1_16	None	834	278	31.00 kDa	None	None	IAPEz-int	ERVK	XP_008825423.1	LOC103729211	1026970 [Organism: Upper Galilee mountains blind mole rat] [Scientific Name: Nannospalax galili]	71.5	200	55	1	80	277	48	247	0.719424	8.16e-85	264	83.5		superfamily	413513	79	244	165	8.62e-06	45.3588	cl02885	Ebola_HIV-1-like_HR1-HR2 superfamily	-
MSTRG.11126	chr17:45660738-45662191	MSTRG.11126.1	multi-exonic	MSTRG.11126.1_10	None	660	220	23.33 kDa	None	Exon overlap Tmem63b	None	None	NA	NA	NA	NA	NA	NA	NA	NA	NA	NA	NA	0	NA	NA	NA		NA	NA	NA	NA	0	NA	NA	NA	NA	NA
MSTRG.11126	chr17:45660738-45662191	MSTRG.11126.2	multi-exonic	MSTRG.11126.2_10	None	492	164	17.53 kDa	None	Exon overlap Tmem63b	None	None	NA	NA	NA	NA	NA	NA	NA	NA	NA	NA	NA	0	NA	NA	NA		NA	NA	NA	NA	0	NA	NA	NA	NA	NA
MSTRG.11394	chr17:66164490-66183448	MSTRG.11394.1	multi-exonic	MSTRG.11394.1_8	None	648	216	24.28 kDa	None	None	MMERVK10c-int	ERVK	SFW07158.1	Integrase core domain	83555 [Organism: Chlamydia abortus] Scientific Name: Chlamydia abortus]	92.093	215	17	0	1	215	321	535	0.99537	1.17e-140	414	93.95		specific	395538	1	88	87	3.36e-17	73.514	pfam00665	rve	cl21549
MSTRG.11394	chr17:66164490-66183448	MSTRG.11394.1	multi-exonic	MSTRG.11394.1_8	None	648	216	24.28 kDa	None	None	MMERVK10c-int	ERVK	SFW07158.1	Integrase core domain	83555 [Organism: Chlamydia abortus] Scientific Name: Chlamydia abortus]	92.093	215	17	0	1	215	321	535	0.99537	1.17e-140	414	93.95		superfamily	395437	155	198	43	5.72e-09	50.0832	cl02895	IN_DBD_C superfamily	-
MSTRG.11394	chr17:66164490-66183448	MSTRG.11394.1	multi-exonic	MSTRG.11394.1_120	None	549	183	20.11 kDa	None	None	MMERVK10c-int	ERVK	EDL38889.1	mCG1041490	10090 [Organism: house mouse] [Scientific Name: Mus musculus]	93.836	146	9	0	25	170	38	183	0.797814	1.87e-95	294	97.26		NA	NA	NA	NA	0	NA	NA	NA	NA	NA
MSTRG.11394	chr17:66164490-66183448	MSTRG.11394.1	multi-exonic	MSTRG.11394.1_202	None	795	265	29.79 kDa	None	None	MMERVK10c-int	ERVK	EDL38889.1	mCG1041490	10090 [Organism: house mouse] [Scientific Name: Mus musculus]	83.886	211	34	0	5	215	180	390	0.796226	2.04e-99	307	89.1		superfamily	413513	58	215	157	0.000474949	39.966	cl02885	Ebola_HIV-1-like_HR1-HR2 superfamily	-
MSTRG.11507	chr17:79713274-79716733	MSTRG.11507.1	mono-exonic	MSTRG.11507.1_3	ORF overlap	483	161	17.79 kDa	None	Exon overlap Cyp1b1	None	None	KAF3842459.1	Hypothetical protein F7725 024410	36200 [Organism: Antarctic toothfish] [Scientific Name: Dissostichus mawsoni]	37.762	143	85	2	14	153	323	464	0.888199	2.15e-10	69.7	46.85		NA	NA	NA	NA	0	NA	NA	NA	NA	NA
MSTRG.11507	chr17:79713274-79716733	MSTRG.11507.1	mono-exonic	MSTRG.11507.1_20	ORF overlap	588	196	21.03 kDa	None	Exon overlap Cyp1b1	None	None	BAC36312.1	1700038P13Rik	10090 [Organism: house mouse] [Scientific Name: Mus musculus]	100	195	0	0	1	195	1	195	0.994898	3.39e-66	212	100		NA	NA	NA	NA	0	NA	NA	NA	NA	NA
MSTRG.11507	chr17:79713274-79716733	MSTRG.11507.1	mono-exonic	MSTRG.11507.1_42	ORF overlap	531	177	18.70 kDa	None	Exon overlap Cyp1b1	None	None	NA	NA	NA	NA	NA	NA	NA	NA	NA	NA	NA	0	NA	NA	NA		NA	NA	NA	NA	0	NA	NA	NA	NA	NA
MSTRG.11507	chr17:79713274-79716733	MSTRG.11507.1	mono-exonic	MSTRG.11507.1_52	ORF overlap	462	154	16.55 kDa	None	Exon overlap Cyp1b1	None	None	NA	NA	NA	NA	NA	NA	NA	NA	NA	NA	NA	0	NA	NA	NA		NA	NA	NA	NA	0	NA	NA	NA	NA	NA
MSTRG.11543	chr17:82955885-82964450	MSTRG.11543.1	multi-exonic	MSTRG.11543.1_26	None	498	166	18.26 kDa	None	Promoter overlap Gm34265	Repeat_B1_Mus1	Alu	EDK99818.1	mCG144875	10090 [Organism: house mouse] [Scientific Name: Mus musculus]	74.419	43	11	0	102	144	45	87	0.259036	3.13e-11	67.8	79.07		superfamily	419670	2	102	100	1.35e-11	60.0895	cl21460	HAD_like superfamily	-
MSTRG.11543	chr17:82955885-82964450	MSTRG.11543.2	multi-exonic	MSTRG.11543.2_30	None	498	166	18.26 kDa	None	Promoter overlap Gm34265	Repeat_B1_Mus1	Alu	EDK99818.1	mCG144875	10090 [Organism: house mouse] [Scientific Name: Mus musculus]	74.419	43	11	0	102	144	45	87	0.259036	3.13e-11	67.8	79.07		superfamily	419670	2	102	100	1.35e-11	60.0895	cl21460	HAD_like superfamily	-
MSTRG.11543	chr17:82955885-82964450	MSTRG.11543.3	multi-exonic	MSTRG.11543.3_19	None	459	153	16.86 kDa	None	Promoter overlap Gm34265	Repeat_B1_Mus1	Alu	XP_036924091.1	PMM1 (phosphomannomutase 1 isoform X2)	192404 [Organism: ] [Scientific Name: Sturnira hondurensis]	34.932	146	77	4	2	142	90	222	0.954248	6.07e-09	64.7	48.63		superfamily	419670	2	102	100	9.76e-12	60.0895	cl21460	HAD_like superfamily	-
MSTRG.11562	chr17:84477953-84512124	MSTRG.11562.3	multi-exonic	MSTRG.11562.3_1	ORF overlap	594	198	20.84 kDa	Gm41642 (XR_877064.1) not overlapping ORFs	Promoter overlap Plekh2	None	None	XP_048272184.1	Translation initiation factor IF-2-like (LOC125388234)	447135 [Organism: Bank vole] [Scientific Name: Myodes glareolus]	42.4	125	28	4	23	140	1	88	0.631313	1.58e-06	57	46.4		superfamily	237057	20	193	173	0.00290198	37.9331	cl36108	PRK12323 superfamily	-
MSTRG.11562	chr17:84477953-84512124	MSTRG.11562.3	multi-exonic	MSTRG.11562.3_16	ORF overlap	666	222	23.01 kDa	Gm41642 (XR_877064.1) not overlapping ORFs	Promoter overlap Plekh2	None	None	NA	NA	NA	NA	NA	NA	NA	NA	NA	NA	NA	0	NA	NA	NA		NA	NA	NA	NA	0	NA	NA	NA	NA	NA
MSTRG.11654	chr18:5139098-5144443	MSTRG.11654.1	multi-exonic	MSTRG.11654.1_9	None	531	177	19.58 kDa	None	Exon overlap LOC115486421	None	None	NA	NA	NA	NA	NA	NA	NA	NA	NA	NA	NA	0	NA	NA	NA		NA	NA	NA	NA	0	NA	NA	NA	NA	NA
MSTRG.11654	chr18:5139098-5144443	MSTRG.11654.1	multi-exonic	MSTRG.11654.1_58	None	864	288	31.89 kDa	None	Exon overlap LOC115486421	None	None	NA	NA	NA	NA	NA	NA	NA	NA	NA	NA	NA	0	NA	NA	NA		NA	NA	NA	NA	0	NA	NA	NA	NA	NA
MSTRG.12357	chr18:82700485-82701751	MSTRG.12357.1	mono-exonic	MSTRG.12357.1_1	None	1170	390	42.36 kDa	None	Exon overlap Gm46620	RLTR4_MM-int	ERV1	YP_009243644.1	Envelope protein (env)	590745 [Organism: ] [Scientific Name: Mus musculus mobilized endogenous polytropic provirus]	100	389	0	0	1	389	253	641	0.997436	0	687	100		specific	306850	17	359	342	0	527.441	pfam00429	TLV_coat	cl27694
MSTRG.12384	chr18:84776641-84838943	MSTRG.12384.1	multi-exonic	MSTRG.12384.1_45	None	2064	688	77.43 kDa	Gm17266	Promoter overlap MSTRG.12385	None	None	NP_001357848.1	Gm17266	10090 [Organism: house mouse] [Scientific Name: Mus musculus]	100	679	0	0	9	687	1	679	0.986919	0	1298	100		specific	406292	15	288	273	1.63e-179	511.112	pfam15813	DUF4708	cl24395
MSTRG.12384	chr18:84776641-84838943	MSTRG.12384.2	multi-exonic	MSTRG.12384.2_199	None	2064	688	77.43 kDa	Gm17266	Promoter overlap MSTRG.12385	None	None	NP_001357848.1	Gm17266	10090 [Organism: house mouse] [Scientific Name: Mus musculus]	100	679	0	0	9	687	1	679	0.986919	0	1298	100		specific	406292	15	288	273	1.63e-179	511.112	pfam15813	DUF4708	cl24395
MSTRG.12535	chr19:6076851-6098493	MSTRG.12535.1	multi-exonic	MSTRG.12535.1_27	ORF overlap	462	154	17.08 kDa	Cdca5 & Gm550 (spliced into 3' end of transcript)	Exon overlap Zfp11	None	None	NA	NA	NA	NA	NA	NA	NA	NA	NA	NA	NA	0	NA	NA	NA		NA	NA	NA	NA	0	NA	NA	NA	NA	NA
MSTRG.12535	chr19:6076851-6098493	MSTRG.12535.1	multi-exonic	MSTRG.12535.1_43	5' end	1362	454	50.06 kDa	Cdca5 & Gm550 (spliced into 3' end of transcript)	Exon overlap Zfp11	None	None	XP_031245256.1	Cdca5	35658 [Organism: southern multimammate mouse] [Scientific Name: Mastomys coucha]	79.81	421	60	4	15	427	1	404	0.927313	0	554	86.46		specific	401560	102	237	135	1.51e-25	101.898	pfam09666	Sororin	cl09879
MSTRG.12535	chr19:6076851-6098493	MSTRG.12535.3	multi-exonic	MSTRG.12535.3_14	5' end	1362	454	50.06 kDa	Cdca5 & Gm550 (spliced into 3' end of transcript)	Exon overlap Zfp11	None	None	XP_031245256.1	Cdca5	35658 [Organism: southern multimammate mouse] [Scientific Name: Mastomys coucha]	79.81	421	60	4	15	427	1	404	0.927313	0	554	86.46		specific	401560	102	237	135	1.51e-25	101.898	pfam09666	Sororin	cl09879
MSTRG.12535	chr19:6076851-6098493	MSTRG.12535.3	multi-exonic	MSTRG.12535.3_88	ORF overlap	462	154	17.08 kDa	Cdca5 & Gm550 (spliced into 3' end of transcript)	Exon overlap Zfp11	None	None	NA	NA	NA	NA	NA	NA	NA	NA	NA	NA	NA	0	NA	NA	NA		NA	NA	NA	NA	0	NA	NA	NA	NA	NA
MSTRG.12535	chr19:6076851-6098493	MSTRG.12535.4	multi-exonic	MSTRG.12535.4_14	5' end	885	295	32.36 kDa	Cdca5 (spliced into 3' end of transcript)	Exon overlap Zfp11	None	None	NP_080686.1	Cdca5	10090 [Organism: house mouse] [Scientific Name: Mus musculus]	100	222	0	0	15	236	1	222	0.752542	9.43e-140	405	100		specific	401560	102	237	135	5.39e-26	100.357	pfam09666	Sororin	cl09879
MSTRG.12535	chr19:6076851-6098493	MSTRG.12535.4	multi-exonic	MSTRG.12535.4_88	ORF overlap	462	154	17.08 kDa	Cdca5 (spliced into 3' end of transcript)	Exon overlap Zfp11	None	None	NA	NA	NA	NA	NA	NA	NA	NA	NA	NA	NA	0	NA	NA	NA		NA	NA	NA	NA	0	NA	NA	NA	NA	NA
MSTRG.12535	chr19:6076851-6098493	MSTRG.12535.5	multi-exonic	MSTRG.12535.5_34	ORF overlap	462	154	17.08 kDa	Cdca5 (spliced into 3' end of transcript)	Exon overlap Zfp11	None	None	NA	NA	NA	NA	NA	NA	NA	NA	NA	NA	NA	0	NA	NA	NA		NA	NA	NA	NA	0	NA	NA	NA	NA	NA
MSTRG.12535	chr19:6076851-6098493	MSTRG.12535.5	multi-exonic	MSTRG.12535.5_59	5' end	1362	454	50.06 kDa	Cdca5 (spliced into 3' end of transcript)	Exon overlap Zfp11	None	None	XP_031245256.1	Cdca5	35658 [Organism: southern multimammate mouse] [Scientific Name: Mastomys coucha]	79.81	421	60	4	15	427	1	404	0.927313	0	554	86.46		specific	401560	102	237	135	1.51e-25	101.898	pfam09666	Sororin	cl09879
MSTRG.12535	chr19:6076851-6098493	MSTRG.12535.7	multi-exonic	MSTRG.12535.7_135	5' end	837	279	30.73 kDa	Cdca5 (spliced into 3' end of transcript)	Promoter overlap Zfp11	None	None	NP_080686.1	Cdca5	10090 [Organism: house mouse] [Scientific Name: Mus musculus]	100	250	0	0	15	264	1	250	0.896057	1.92e-148	426	100		specific	401560	102	237	135	1.33e-27	104.209	pfam09666	Sororin	cl09879
MSTRG.12535	chr19:6076851-6098493	MSTRG.12535.8	multi-exonic	MSTRG.12535.8_45	5' end	987	329	35.74 kDa	Cdca5 (spliced into 3' end of transcript)	Promoter overlap Zfp11	None	None	NP_080686.1	Cdca5	10090 [Organism: house mouse] [Scientific Name: Mus musculus]	100	222	0	0	15	236	1	222	0.674772	2.85e-139	405	100		specific	401560	102	237	135	9.06e-27	103.053	pfam09666	Sororin	cl09879
MSTRG.12535	chr19:6076851-6098493	MSTRG.12535.9	multi-exonic	MSTRG.12535.9_49	5' end	762	254	27.80 kDa	Cdca5 (spliced into 3' end of transcript)	Promoter overlap Zfp11	None	None	NP_080686.1	Cdca5	10090 [Organism: house mouse] [Scientific Name: Mus musculus]	100	222	0	0	15	236	1	222	0.874016	1.09e-139	403	100		specific	401560	102	237	135	1.77e-26	100.742	pfam09666	Sororin	cl09879
MSTRG.12535	chr19:6076851-6098493	MSTRG.12535.10	multi-exonic	MSTRG.12535.10_61	5' end	837	279	30.73 kDa	Cdca5 & Gm550 (spliced into 3' end of transcript)	Promoter overlap Zfp11	None	None	NP_080686.1	Cdca5	10090 [Organism: house mouse] [Scientific Name: Mus musculus]	100	250	0	0	15	264	1	250	0.896057	1.92e-148	426	100		specific	401560	102	237	135	1.33e-27	104.209	pfam09666	Sororin	cl09879
MSTRG.12535	chr19:6076851-6098493	MSTRG.12535.10	multi-exonic	MSTRG.12535.10_97	None	543	181	20.07 kDa	Cdca5 & Gm550 (spliced into 3' end of transcript)	Promoter overlap Zfp11	None	None	NP_001349356.1	Gm550	10090 [Organism: house mouse] [Scientific Name: Mus musculus]	96.575	146	5	0	11	156	15	160	0.80663	4.77e-77	238	97.95		NA	NA	NA	NA	0	NA	NA	NA	NA	NA
MSTRG.12535	chr19:6076851-6098493	MSTRG.12535.17	multi-exonic	MSTRG.12535.17_24	None	543	181	20.07 kDa	Gm550 (spliced into 3' end of transcript)	None	None	None	NP_001349356.1	Gm550	10090 [Organism: house mouse] [Scientific Name: Mus musculus]	96.575	146	5	0	11	156	15	160	0.80663	4.77e-77	238	97.95		NA	NA	NA	NA	0	NA	NA	NA	NA	NA
MSTRG.12535	chr19:6076851-6098493	MSTRG.12535.12	multi-exonic	MSTRG.12535.12_26	None	543	181	20.07 kDa	Gm550 (spliced into 3' end of transcript)	None	None	None	NP_001349356.1	Gm550	10090 [Organism: house mouse] [Scientific Name: Mus musculus]	96.575	146	5	0	11	156	15	160	0.80663	4.77e-77	238	97.95		NA	NA	NA	NA	0	NA	NA	NA	NA	NA
MSTRG.12535	chr19:6076851-6098493	MSTRG.12535.13	multi-exonic	MSTRG.12535.13_20	None	612	204	22.59 kDa	Gm550 (spliced into 3' end of transcript)	None	None	None	NP_001349356.1	Gm550	10090 [Organism: house mouse] [Scientific Name: Mus musculus]	100	160	0	0	20	179	1	160	0.784314	9.78e-92	276	100		NA	NA	NA	NA	0	NA	NA	NA	NA	NA
MSTRG.12535	chr19:6076851-6098493	MSTRG.12535.14	multi-exonic	MSTRG.12535.14_12	None	477	159	17.77 kDa	Gm550 (spliced into 3' end of transcript)	None	None	None	NP_001349356.1	Gm550	10090 [Organism: house mouse] [Scientific Name: Mus musculus]	99.254	134	1	0	1	134	27	160	0.842767	5.85e-72	224	100		NA	NA	NA	NA	0	NA	NA	NA	NA	NA
MSTRG.12535	chr19:6076851-6098493	MSTRG.12535.19	multi-exonic	MSTRG.12535.19_14	None	543	181	20.07 kDa	Gm550 (spliced into 3' end of transcript)	None	None	None	NP_001349356.1	Gm550	10090 [Organism: house mouse] [Scientific Name: Mus musculus]	96.575	146	5	0	11	156	15	160	0.80663	4.77e-77	238	97.95		NA	NA	NA	NA	0	NA	NA	NA	NA	NA
MSTRG.12535	chr19:6076851-6098493	MSTRG.12535.20	multi-exonic	MSTRG.12535.20_13	None	477	159	17.77 kDa	Gm550 (spliced into 3' end of transcript)	None	None	None	NP_001349356.1	Gm550	10090 [Organism: house mouse] [Scientific Name: Mus musculus]	99.254	134	1	0	1	134	27	160	0.842767	5.85e-72	224	100		NA	NA	NA	NA	0	NA	NA	NA	NA	NA
MSTRG.12623	chr19:8893795-8897982	MSTRG.12623.1	mono-exonic	MSTRG.12623.1_33	5' end and 3' end	606	202	22.39 kDa	Upstream of Ganab	Exon overlap Gm49416	None	None	NA	NA	NA	NA	NA	NA	NA	NA	NA	NA	NA	0	NA	NA	NA		NA	NA	NA	NA	0	NA	NA	NA	NA	NA
MSTRG.12645	chr19:10192455-10198227	MSTRG.12645.1	multi-exonic	MSTRG.12645.1_26	None	639	213	23.59 kDa	None	Exon overlap Fads1	None	None	NA	NA	NA	NA	NA	NA	NA	NA	NA	NA	NA	0	NA	NA	NA		NA	NA	NA	NA	0	NA	NA	NA	NA	NA
MSTRG.12645	chr19:10192455-10198227	MSTRG.12645.2	multi-exonic	MSTRG.12645.2_29	None	519	173	18.77 kDa	None	Exon overlap Fads1	None	None	NA	NA	NA	NA	NA	NA	NA	NA	NA	NA	NA	0	NA	NA	NA		NA	NA	NA	NA	0	NA	NA	NA	NA	NA
MSTRG.12768	chr19:22441015-22442366	MSTRG.12768.1	mono-exonic	MSTRG.12768.1_2	None	783	261	30.04 kDa	Intron of Trpm3	Exon overlap Gm27151	None	None	NP_067527.3	Nsa2	10090 [Organism: house mouse] [Scientific Name: Mus musculus]	99.615	260	1	0	1	260	1	260	0.996169	8.21e-179	502	100	yes: Nsa2-ps2 (Origin gene: Nsa2, chr13:97,265,935-97,274,434	specific	211393	4	260	256	0	523.725	cd11381	NSA2	cl00880
MSTRG.12803	chr19:25617919-25623277	MSTRG.12803.1	mono-exonic	MSTRG.12803.1_4	ORF overlap	483	161	16.95 kDa	None	Exon overlap Dmrt3	None	None	NA	NA	NA	NA	NA	NA	NA	NA	NA	NA	NA	0	NA	NA	NA		NA	NA	NA	NA	0	NA	NA	NA	NA	NA
MSTRG.12829	chr19:28974256-28975671	MSTRG.12829.1	mono-exonic	MSTRG.12829.1_11	ORF overlap	1101	367	42.21 kDa	None	None	None	None	XP_021007953.1	Tektin-5-like (Tekt5l; LOC110285845)	10089 [Organism: Ryukyu mouse] [Scientific Name: Mus caroli]	96.995	366	11	0	1	366	1	366	0.997275	0	744	98.63	yes: Tekt5l (Origin gene: Tekt5, chr16:10,175,816-10,213,319)	specific	397319	93	340	247	1.73e-79	248.225	pfam03148	Tektin	cl27112
MSTRG.12875	chr19:33589645-33595613	MSTRG.12875.1	mono-exonic	MSTRG.12875.1_21	None	501	167	17.85 kDa	None	Exon overlap Lipo3	L1Md_T	LINE1	NA	NA	NA	NA	NA	NA	NA	NA	NA	NA	NA	0	NA	NA	NA		NA	NA	NA	NA	0	NA	NA	NA	NA	NA
MSTRG.12875	chr19:33589645-33595613	MSTRG.12875.1	mono-exonic	MSTRG.12875.1_61	None	1116	372	43.04 kDa	None	Exon overlap Lipo3	L1Md_T	LINE1	SFW04777.1	Exonuclease III	83555 [Organism: Chlamydia abortus] Scientific Name: Chlamydia abortus]	96.765	371	12	0	1	371	1	371	0.997312	0	679	97.57		superfamily	397235	191	288	97	1.19e-21	88.2992	cl25509	Transposase_22 superfamily	-
MSTRG.12875	chr19:33589645-33595613	MSTRG.12875.1	mono-exonic	MSTRG.12875.1_61	None	1116	372	43.04 kDa	None	Exon overlap Lipo3	L1Md_T	LINE1	SFW04777.1	Exonuclease III	83555 [Organism: Chlamydia abortus] Scientific Name: Chlamydia abortus]	96.765	371	12	0	1	371	1	371	0.997312	0	679	97.57		superfamily	407521	292	355	63	2.24e-10	55.8797	cl38762	Tnp_22_dsRBD superfamily	-
MSTRG.12875	chr19:33589645-33595613	MSTRG.12875.1	mono-exonic	MSTRG.12875.1_61	None	1116	372	43.04 kDa	None	Exon overlap Lipo3	L1Md_T	LINE1	SFW04777.1	Exonuclease III	83555 [Organism: Chlamydia abortus] Scientific Name: Chlamydia abortus]	96.765	371	12	0	1	371	1	371	0.997312	0	679	97.57		superfamily	224117	60	197	137	2.34e-06	49.7128	cl34174	Smc superfamily	-
MSTRG.12875	chr19:33589645-33595613	MSTRG.12875.1	mono-exonic	MSTRG.12875.1_113	None	555	185	21.13 kDa	None	Exon overlap Lipo3	L1Md_T	LINE1	SFW04660.1	Exonuclease III	83555 [Organism: Chlamydia abortus] Scientific Name: Chlamydia abortus]	97.814	183	4	0	1	183	1	183	0.989189	1.83e-128	369	98.36		specific	197310	17	172	155	6.25e-43	143.261	cd09076	L1-EN	cl00490
MSTRG.13284	chr2:11807542-11842034	MSTRG.13284.1	multi-exonic	MSTRG.13284.1_31	None	498	166	19.38 kDa	None	None	L1Md_F2	LINE1	SBW38362.1	Reverse transcriptase (RNA-dependent DNA polymerase)	5821 [Organism: Plasmodium berghei] [Scientific Name: Plasmodium berghei]	89.441	161	17	0	2	162	58	218	0.96988	4e-96	295	91.93		NA	NA	NA	NA	0	NA	NA	NA	NA	NA
MSTRG.13284	chr2:11807542-11842034	MSTRG.13284.1	multi-exonic	MSTRG.13284.1_46	None	498	166	19.38 kDa	None	None	None	None	XP_032741100.1	Ankyrin repeat domain-containing protein 26-like (ANKRD26L; LOC116883975)	10117 [Organism: black rat] [Scientific Name: Rattus rattus]	57.396	169	72	0	3	171	1101	1269	0.954802	2.11e-48	179	74.56		superfamily	403277	119	169	50	9.21e-05	40.0238	cl13439	DUF3496 superfamily	-
MSTRG.13284	chr2:11807542-11842034	MSTRG.13284.1	multi-exonic	MSTRG.13284.1_87	None	498	166	19.38 kDa	None	None	L1Md_F2	LINE1	EAA20074.1	pORF1	73239 [Organism:] [Scientific Name: Plasmodium yoelii yoelii]	80	185	25	1	1	185	1	173	0.994624	2.21e-92	281	84.86		superfamily	237177	50	177	127	1.27e-05	44.3838	cl36166	PRK12704 superfamily	-
MSTRG.13362	chr2:23280698-23307356	MSTRG.13362.1	multi-exonic	MSTRG.13362.1_56	None	1014	338	39.02 kDa	None	None	L1Md_F3	LINE1	SGW38391.1	Exonuclease III	83555 [Organism: Chlamydia abortus] Scientific Name: Chlamydia abortus]	96.736	337	11	0	1	337	1	337	0.997041	0	674	98.81		specific	197310	17	242	225	1.52e-66	209.13	cd09076	L1-EN	cl00490
MSTRG.13362	chr2:23280698-23307356	MSTRG.13362.1	multi-exonic	MSTRG.13362.1_68	None	834	278	33.01 kDa	None	None	L1Md_F3	LINE1	SFW04367.1	Retron-type Reverse transcriptase	83555 [Organism: Chlamydia abortus] Scientific Name: Chlamydia abortus]	92.164	268	21	0	1	268	1	268	0.964029	0	510	94.78		NA	NA	NA	NA	0	NA	NA	NA	NA	NA
MSTRG.13362	chr2:23280698-23307356	MSTRG.13362.1	multi-exonic	MSTRG.13362.1_72	None	600	200	22.82 kDa	None	None	L1Md_F3	LINE1	SFW05767.1	L1 transposable element	83555 [Organism: Chlamydia abortus] Scientific Name: Chlamydia abortus]	97.753	178	4	0	3	180	96	273	0.89	4.2e-121	355	98.31		superfamily	397235	65	162	97	2.38e-24	91.766	cl25509	Transposase_22 superfamily	-
MSTRG.13362	chr2:23280698-23307356	MSTRG.13362.1	multi-exonic	MSTRG.13362.1_74	None	1452	484	56.37 kDa	None	None	L1Md_F3	LINE1	SGW38391.1	Exonuclease III	83555 [Organism: Chlamydia abortus] Scientific Name: Chlamydia abortus]	91.213	478	42	0	1	478	1	478	0.987603	0	895	95.4		specific	197310	17	242	225	4e-62	202.196	cd09076	L1-EN	cl00490
MSTRG.13362	chr2:23280698-23307356	MSTRG.13362.1	multi-exonic	MSTRG.13362.1_116	None	489	163	18.56 kDa	None	None	IAPLTR3-int	ERVK	EDL08153.1	mCG1030119	10090 [Organism: house mouse] [Scientific Name: Mus musculus]	100	162	0	0	1	162	1	162	0.993865	3.04e-101	298	100		NA	NA	NA	NA	0	NA	NA	NA	NA	NA
MSTRG.13362	chr2:23280698-23307356	MSTRG.13362.1	multi-exonic	MSTRG.13362.1_224	None	561	187	21.07 kDa	None	None	IAPLTR3-int	ERVK	XP_027288878.1	IgE-binding protein-like (LOC107980247)	10029 [Organism: Chinese hamster] [Scientific Name: Cricetulus griseus]	65.174	201	54	2	1	185	1	201	1.07487	4.57e-71	227	77.61		superfamily	396766	5	84	79	7.36e-17	71.6004	cl03546	Gag_p10 superfamily	-
MSTRG.13362	chr2:23280698-23307356	MSTRG.13362.1	multi-exonic	MSTRG.13362.1_265	None	954	318	36.70 kDa	None	None	L1Md_F3	LINE1	CRH55763.1	L1 transposable element	813 [Organism: Chlamydia trachomatis] [Scientific Name: Chlamydia trachomatis]	92.07	227	18	0	91	317	38	264	0.713836	9.32e-140	410	96.04		superfamily	397235	244	317	73	5.01e-10	55.5573	cl25509	Transposase_22 superfamily	-
MSTRG.13362	chr2:23280698-23307356	MSTRG.13362.1	multi-exonic	MSTRG.13362.1_265	None	954	318	36.70 kDa	None	None	L1Md_F3	LINE1	CRH55763.1	L1 transposable element	813 [Organism: Chlamydia trachomatis] [Scientific Name: Chlamydia trachomatis]	92.07	227	18	0	91	317	38	264	0.713836	9.32e-140	410	96.04		superfamily	224117	86	289	203	7.34e-06	47.4016	cl34174	Smc superfamily	-
MSTRG.13362	chr2:23280698-23307356	MSTRG.13362.1	multi-exonic	MSTRG.13362.1_272	None	648	216	25.07 kDa	None	None	L1Md_F3	LINE1	WP_216596011.1	Reverse transcriptase family protein	813 [Organism: Chlamydia trachomatis] [Scientific Name: Chlamydia trachomatis]	95.327	214	10	0	2	215	103	316	0.990741	1.05e-144	421	97.2		superfamily	413489	150	215	65	2.99e-22	90.043	cl02808	RT_like superfamily	-
MSTRG.13362	chr2:23280698-23307356	MSTRG.13362.1	multi-exonic	MSTRG.13362.1_306	None	1317	439	52.05 kDa	None	None	L1Md_F3	LINE1	GGZ10838.1	Hypothetical protein GCM10010385 69480	68207 [Organism:] [Scientific Name: Streptomyces geysiriensis]	93.379	438	28	1	2	438	610	1047	0.997722	0	830	95.43		superfamily	413489	2	110	108	2.63e-20	88.8874	cl02808	RT_like superfamily	-
MSTRG.13362	chr2:23280698-23307356	MSTRG.13362.2	multi-exonic	MSTRG.13362.2_44	None	1014	338	39.02 kDa	None	None	L1Md_F3	LINE1	SGW38391.1	Exonuclease III	83555 [Organism: Chlamydia abortus] Scientific Name: Chlamydia abortus]	96.736	337	11	0	1	337	1	337	0.997041	0	674	98.81		specific	197310	17	242	225	1.52e-66	209.13	cd09076	L1-EN	cl00490
MSTRG.13362	chr2:23280698-23307356	MSTRG.13362.2	multi-exonic	MSTRG.13362.2_56	None	834	278	33.01 kDa	None	None	L1Md_F3	LINE1	SFW04367.1	Retron-type Reverse transcriptase	83555 [Organism: Chlamydia abortus] Scientific Name: Chlamydia abortus]	92.164	268	21	0	1	268	1	268	0.964029	0	510	94.78		NA	NA	NA	NA	0	NA	NA	NA	NA	NA
MSTRG.13362	chr2:23280698-23307356	MSTRG.13362.2	multi-exonic	MSTRG.13362.2_60	None	600	200	22.82 kDa	None	None	L1Md_F3	LINE1	SFW05767.1	L1 transposable element	83555 [Organism: Chlamydia abortus] Scientific Name: Chlamydia abortus]	97.753	178	4	0	3	180	96	273	0.89	4.2e-121	355	98.31		superfamily	397235	65	162	97	2.38e-24	91.766	cl25509	Transposase_22 superfamily	-
MSTRG.13362	chr2:23280698-23307356	MSTRG.13362.2	multi-exonic	MSTRG.13362.2_62	None	1452	484	56.37 kDa	None	None	L1Md_F3	LINE1	SGW38391.1	Exonuclease III	83555 [Organism: Chlamydia abortus] Scientific Name: Chlamydia abortus]	91.213	478	42	0	1	478	1	478	0.987603	0	895	95.4		specific	197310	17	242	225	4e-62	202.196	cd09076	L1-EN	cl00490
MSTRG.13362	chr2:23280698-23307356	MSTRG.13362.2	multi-exonic	MSTRG.13362.2_89	None	684	228	24.53 kDa	None	None	IAPLTR3-int	ERVK	EDL05743.1	mCG1026367	10090 [Organism: house mouse] [Scientific Name: Mus musculus]	92.857	84	6	0	81	164	31	114	0.368421	2.23e-45	157	94.05		NA	NA	NA	NA	0	NA	NA	NA	NA	NA
MSTRG.13362	chr2:23280698-23307356	MSTRG.13362.2	multi-exonic	MSTRG.13362.2_91	None	489	163	18.56 kDa	None	None	IAPLTR3-int	ERVK	EDL08153.1	mCG1030119	10090 [Organism: house mouse] [Scientific Name: Mus musculus]	100	162	0	0	1	162	1	162	0.993865	3.04e-101	298	100		NA	NA	NA	NA	0	NA	NA	NA	NA	NA
MSTRG.13362	chr2:23280698-23307356	MSTRG.13362.2	multi-exonic	MSTRG.13362.2_234	None	954	318	36.70 kDa	None	None	L1Md_F3	LINE1	CRH55763.1	L1 transposable element	813 [Organism: Chlamydia trachomatis] [Scientific Name: Chlamydia trachomatis]	92.07	227	18	0	91	317	38	264	0.713836	9.32e-140	410	96.04		superfamily	397235	244	317	73	5.01e-10	55.5573	cl25509	Transposase_22 superfamily	-
MSTRG.13362	chr2:23280698-23307356	MSTRG.13362.2	multi-exonic	MSTRG.13362.2_234	None	954	318	36.70 kDa	None	None	L1Md_F3	LINE1	CRH55763.1	L1 transposable element	813 [Organism: Chlamydia trachomatis] [Scientific Name: Chlamydia trachomatis]	92.07	227	18	0	91	317	38	264	0.713836	9.32e-140	410	96.04		superfamily	224117	86	289	203	7.34e-06	47.4016	cl34174	Smc superfamily	-
MSTRG.13362	chr2:23280698-23307356	MSTRG.13362.2	multi-exonic	MSTRG.13362.2_241	None	648	216	25.07 kDa	None	None	L1Md_F3	LINE1	NA	NA	NA	NA	NA	NA	NA	NA	NA	NA	NA	0	NA	NA	NA		superfamily	413489	150	215	65	2.99e-22	90.043	cl02808	RT_like superfamily	-
MSTRG.13362	chr2:23280698-23307356	MSTRG.13362.2	multi-exonic	MSTRG.13362.2_275	None	1317	439	52.05 kDa	None	None	L1Md_F3	LINE1	GGZ10838.1	Hypothetical protein GCM10010385 69480	68207 [Organism:] [Scientific Name: Streptomyces geysiriensis]	93.379	438	28	1	2	438	610	1047	0.997722	0	830	95.43		superfamily	413489	2	110	108	2.63e-20	88.8874	cl02808	RT_like superfamily	-
MSTRG.13704	chr2:39806482-39816255	MSTRG.13704.1	mono-exonic	MSTRG.13704.1_82	None	1017	339	38.16 kDa	None	None	IAPLTR3-int	ERVK	P04023.1	IAP gag	11752 [Organism:] [Organism: Golden hamster intracisternal A-particle H18]	61.364	352	119	7	1	336	1	351	1.03835	1.4e-126	384	75.28		superfamily	396766	5	84	79	2.84e-16	72.756	cl03546	Gag_p10 superfamily	-
MSTRG.13704	chr2:39806482-39816255	MSTRG.13704.1	mono-exonic	MSTRG.13704.1_82	None	1017	339	38.16 kDa	None	None	IAPLTR3-int	ERVK	P04023.1	IAP gag	11752 [Organism:] [Organism: Golden hamster intracisternal A-particle H18]	61.364	352	119	7	1	336	1	351	1.03835	1.4e-126	384	75.28		superfamily	395483	262	317	55	9.38e-07	48.6967	cl02908	Gag_p24 superfamily	-
MSTRG.14414	chr2:128122121-128127546	MSTRG.14414.1	multi-exonic	MSTRG.14414.1_18	ORF overlap	702	234	26.03 kDa	None	Promoter overlap Bcl2l11	None	None	XP_029794397.1	LOC115290709	37032 [Organism: meerkat] [Scientific Name: Suricata suricatta]	42.105	76	38	2	151	220	173	248	0.324786	0.031	47.8	50		NA	NA	NA	NA	0	NA	NA	NA	NA	NA
MSTRG.14901	chr2:163651393-163656295	MSTRG.14901.1	mono-exonic	MSTRG.14901.1_1	None	564	188	21.35 kDa	None	None	IAPEz-int	ERVK	XP_036021566.1	Gm54326	10090 [Organism: house mouse] [Scientific Name: Mus musculus]	85.271	129	19	0	1	129	41	169	0.68617	4.93e-45	167	92.25		NA	NA	NA	NA	0	NA	NA	NA	NA	NA
MSTRG.14901	chr2:163651393-163656295	MSTRG.14901.1	mono-exonic	MSTRG.14901.1_5	None	1887	629	69.56 kDa	None	None	IAPEz-int	ERVK	CCD12801.1	unnamed protein product	1068625 [Organism:] [Scientific Name: Trypanosoma congolense IL3000]	97.619	630	13	1	1	628	288	917	1.00159	0	1254	98.73		specific	260005	194	318	124	3.84e-31	117.824	cd09273	RNase_HI_RT_Bel	cl14782
MSTRG.14901	chr2:163651393-163656295	MSTRG.14901.1	mono-exonic	MSTRG.14901.1_5	None	1887	629	69.56 kDa	None	None	IAPEz-int	ERVK	CCD12801.1	unnamed protein product	1068625 [Organism:] [Scientific Name: Trypanosoma congolense IL3000]	97.619	630	13	1	1	628	288	917	1.00159	0	1254	98.73		specific	395538	380	474	94	5.03e-25	99.3224	pfam00665	rve	cl21549
MSTRG.14901	chr2:163651393-163656295	MSTRG.14901.1	mono-exonic	MSTRG.14901.1_5	None	1887	629	69.56 kDa	None	None	IAPEz-int	ERVK	CCD12801.1	unnamed protein product	1068625 [Organism:] [Scientific Name: Trypanosoma congolense IL3000]	97.619	630	13	1	1	628	288	917	1.00159	0	1254	98.73		superfamily	399655	1	47	46	1.47e-17	76.9698	cl06055	RVT_thumb superfamily	-
MSTRG.14901	chr2:163651393-163656295	MSTRG.14901.1	mono-exonic	MSTRG.14901.1_5	None	1887	629	69.56 kDa	None	None	IAPEz-int	ERVK	CCD12801.1	unnamed protein product	1068625 [Organism:] [Scientific Name: Trypanosoma congolense IL3000]	97.619	630	13	1	1	628	288	917	1.00159	0	1254	98.73		specific	395437	543	588	45	7.48e-13	63.18	pfam00552	IN_DBD_C	cl02895
MSTRG.14901	chr2:163651393-163656295	MSTRG.14901.1	mono-exonic	MSTRG.14901.1_5	None	1887	629	69.56 kDa	None	None	IAPEz-int	ERVK	CCD12801.1	unnamed protein product	1068625 [Organism:] [Scientific Name: Trypanosoma congolense IL3000]	97.619	630	13	1	1	628	288	917	1.00159	0	1254	98.73		specific	396557	328	364	36	7.5e-13	62.7175	pfam02022	Integrase_Zn	cl08339
MSTRG.14901	chr2:163651393-163656295	MSTRG.14901.1	mono-exonic	MSTRG.14901.1_50	None	744	248	27.34 kDa	None	None	IAPEz-int	ERVK	AAH31501.1	LOC635138 protein	10090 [Organism: house mouse] [Scientific Name: Mus musculus]	70.312	192	54	1	10	198	45	236	0.774194	8.46e-78	245	80.73		superfamily	413513	9	156	147	1.59e-05	44.2032	cl02885	Ebola_HIV-1-like_HR1-HR2 superfamily	-
MSTRG.15237	chr3:6135266-6143181	MSTRG.15237.1	multi-exonic	MSTRG.15237.1_65	None	594	198	21.96 kDa	None	Exon overlap MSTRG.15238	None	None	NA	NA	NA	NA	NA	NA	NA	NA	NA	NA	NA	0	NA	NA	NA		NA	NA	NA	NA	0	NA	NA	NA	NA	NA
MSTRG.15415	chr3:35871528-35873679	MSTRG.15415.1	mono-exonic	MSTRG.15415.1_4	None	537	179	19.90 kDa	None	None	IAPEz-int	ERVK	SGW53377.1	deoxyuridine 5'-triphosphate nucleotidohydrolase	83555 [Organism: Chlamydia abortus] Scientific Name: Chlamydia abortus]	96.923	65	2	0	108	172	1	65	0.363128	1.19e-36	132	96.92		superfamily	412409	106	163	57	1.56e-10	55.758	cl00493	trimeric_dUTPase superfamily	-
MSTRG.15415	chr3:35871528-35873679	MSTRG.15415.1	mono-exonic	MSTRG.15415.1_24	None	732	244	27.26 kDa	None	None	IAPEz-int	ERVK	SFW03938.1	Integrase core domain	83555 [Organism: Chlamydia abortus] Scientific Name: Chlamydia abortus]	93.802	242	15	0	1	242	72	313	0.991803	4.38e-173	489	97.93		specific	395538	1	88	87	3.44e-22	87.3812	pfam00665	rve	cl21549
MSTRG.15415	chr3:35871528-35873679	MSTRG.15415.1	mono-exonic	MSTRG.15415.1_24	None	732	244	27.26 kDa	None	None	IAPEz-int	ERVK	SFW03938.1	Integrase core domain	83555 [Organism: Chlamydia abortus] Scientific Name: Chlamydia abortus]	93.802	242	15	0	1	242	72	313	0.991803	4.38e-173	489	97.93		specific	395437	158	203	45	3.64e-14	64.7208	pfam00552	IN_DBD_C	cl02895
MSTRG.15612	chr3:66312143-66314460	MSTRG.15612.1	mono-exonic	MSTRG.15612.1_39	None	957	319	35.83 kDa	None	None	IAPEz-int	ERVK	XP_036021566.1	Gm54326	10090 [Organism: house mouse] [Scientific Name: Mus musculus]	86.076	158	18	1	65	218	12	169	0.495298	2.94e-76	255	89.87		superfamily	395483	219	301	82	7.48e-15	71.8087	cl02908	Gag_p24 superfamily	-
MSTRG.15816	chr3:89430700-89437400	MSTRG.15816.1	multi-exonic	MSTRG.15816.1_42	None	543	181	18.80 kDa	None	Exon overlap Pygo2	None	None	NA	NA	NA	NA	NA	NA	NA	NA	NA	NA	NA	0	NA	NA	NA		NA	NA	NA	NA	0	NA	NA	NA	NA	NA
MSTRG.15862	chr3:91639302-91649319	MSTRG.15862.1	mono-exonic	MSTRG.15862.1_6	None	522	174	19.54 kDa	None	None	MMERVK10c-int	ERVK	SFW07159.1	Reverse transcriptase (RNA-dependent DNA polymerase)	83555 [Organism: Chlamydia abortus] Scientific Name: Chlamydia abortus]	81.148	122	18	1	57	173	36	157	0.701149	5.58e-63	210	89.34		superfamily	413489	57	173	116	2.04e-73	219.462	cl02808	RT_like superfamily	-
MSTRG.15862	chr3:91639302-91649319	MSTRG.15862.1	mono-exonic	MSTRG.15862.1_7	None	1287	429	48.00 kDa	None	None	MMERVK10c-int	ERVK	SGA30718.1	Rnase H	83555 [Organism: Chlamydia abortus] Scientific Name: Chlamydia abortus]	94.754	305	16	0	124	428	1	305	0.710956	0	605	97.7		specific	399655	57	117	60	1.15e-32	117.801	pfam06817	RVT_thumb	cl06055
MSTRG.15862	chr3:91639302-91649319	MSTRG.15862.1	mono-exonic	MSTRG.15862.1_7	None	1287	429	48.00 kDa	None	None	MMERVK10c-int	ERVK	SGA30718.1	Rnase H	83555 [Organism: Chlamydia abortus] Scientific Name: Chlamydia abortus]	94.754	305	16	0	124	428	1	305	0.710956	0	605	97.7		superfamily	417494	270	390	120	4.72e-31	115.513	cl14782	RNase_H_like superfamily	-
MSTRG.15862	chr3:91639302-91649319	MSTRG.15862.1	mono-exonic	MSTRG.15862.1_7	None	1287	429	48.00 kDa	None	None	MMERVK10c-int	ERVK	SGA30718.1	Rnase H	83555 [Organism: Chlamydia abortus] Scientific Name: Chlamydia abortus]	94.754	305	16	0	124	428	1	305	0.710956	0	605	97.7		superfamily	413489	1	50	49	1.08e-08	54.9816	cl02808	RT_like superfamily	-
MSTRG.15862	chr3:91639302-91649319	MSTRG.15862.1	mono-exonic	MSTRG.15862.1_7	None	1287	429	48.00 kDa	None	None	MMERVK10c-int	ERVK	SGA30718.1	Rnase H	83555 [Organism: Chlamydia abortus] Scientific Name: Chlamydia abortus]	94.754	305	16	0	124	428	1	305	0.710956	0	605	97.7		superfamily	396557	403	428	25	1.58e-05	41.5315	cl08339	Integrase_Zn superfamily	-
MSTRG.15862	chr3:91639302-91649319	MSTRG.15862.1	mono-exonic	MSTRG.15862.1_8	None	849	283	32.28 kDa	None	None	MMERVK10c-int	ERVK	SFW07158.1	Integrase core domain	83555 [Organism: Chlamydia abortus] Scientific Name: Chlamydia abortus]	96.172	209	8	0	1	209	313	521	0.738516	8.94e-143	422	97.13		specific	395538	2	96	94	2.74e-21	85.8404	pfam00665	rve	cl21549
MSTRG.15862	chr3:91639302-91649319	MSTRG.15862.1	mono-exonic	MSTRG.15862.1_8	None	849	283	32.28 kDa	None	None	MMERVK10c-int	ERVK	SFW07158.1	Integrase core domain	83555 [Organism: Chlamydia abortus] Scientific Name: Chlamydia abortus]	96.172	209	8	0	1	209	313	521	0.738516	8.94e-143	422	97.13		superfamily	395437	163	206	43	1.15e-11	58.5576	cl02895	IN_DBD_C superfamily	-
MSTRG.15862	chr3:91639302-91649319	MSTRG.15862.1	mono-exonic	MSTRG.15862.1_103	None	528	176	20.06 kDa	None	None	MMERVK10c-int	ERVK	SFW07156.1	Retroviral Envelope protein	83555 [Organism: Chlamydia abortus] Scientific Name: Chlamydia abortus]	96.571	175	6	0	1	175	72	246	0.994318	3.68e-121	352	98.86		NA	NA	NA	NA	0	NA	NA	NA	NA	NA
MSTRG.15919	chr3:95410867-95421930	MSTRG.15919.1	mono-exonic	MSTRG.15919.1_174	None	801	267	29.92 kDa	None	Promoter overlap MSTRG.15918	IAPEY3-int	ERVK	SFW04630.1	Reverse transcriptase (RNA-dependent DNA polymerase)	83555 [Organism: Chlamydia abortus] Scientific Name: Chlamydia abortus]	73.004	263	71	0	1	263	70	332	0.985019	9.45e-137	399	85.55		specific	399655	88	153	65	7.23e-29	104.319	pfam06817	RVT_thumb	cl06055
MSTRG.15919	chr3:95410867-95421930	MSTRG.15919.1	mono-exonic	MSTRG.15919.1_174	None	801	267	29.92 kDa	None	Promoter overlap MSTRG.15918	IAPEY3-int	ERVK	SFW04630.1	Reverse transcriptase (RNA-dependent DNA polymerase)	83555 [Organism: Chlamydia abortus] Scientific Name: Chlamydia abortus]	73.004	263	71	0	1	263	70	332	0.985019	9.45e-137	399	85.55		superfamily	413489	1	81	80	7.33e-25	98.124	cl02808	RT_like superfamily	-
MSTRG.15919	chr3:95410867-95421930	MSTRG.15919.1	mono-exonic	MSTRG.15919.1_258	None	534	178	19.25 kDa	None	Promoter overlap MSTRG.15918	IAPEY3-int	ERVK	XP_032746417.1	Endogenous retrovirus group K member 10 Pro protein-like (LOC116889590)	10117 [Organism: black rat] [Scientific Name: Rattus rattus]	70.323	155	46	0	23	177	1	155	0.870787	4.46e-70	223	81.29		superfamily	412409	4	121	117	7.93e-22	85.4183	cl00493	trimeric_dUTPase superfamily	-
MSTRG.15919	chr3:95410867-95421930	MSTRG.15919.1	mono-exonic	MSTRG.15919.1_258	None	534	178	19.25 kDa	None	Promoter overlap MSTRG.15918	IAPEY3-int	ERVK	XP_032746417.1	Endogenous retrovirus group K member 10 Pro protein-like (LOC116889590)	10117 [Organism: black rat] [Scientific Name: Rattus rattus]	70.323	155	46	0	23	177	1	155	0.870787	4.46e-70	223	81.29		superfamily	416259	137	177	40	9.46e-09	49.9573	cl11403	pepsin_retropepsin_like superfamily	-
MSTRG.16165	chr3:109250832-109264244	MSTRG.16165.1	multi-exonic	MSTRG.16165.1_83	None	1752	584	67.77 kDa	None	None	L1Md_F	LINE1	P11369.2	ORF2p	10090 [Organism: house mouse] [Scientific Name: Mus musculus]	96.569	583	20	0	1	583	1	583	0.998288	0	1128	98.28		specific	197310	17	242	225	7.32e-64	209.515	cd09076	L1-EN	cl00490
MSTRG.16165	chr3:109250832-109264244	MSTRG.16165.1	multi-exonic	MSTRG.16165.1_83	None	1752	584	67.77 kDa	None	None	L1Md_F	LINE1	P11369.2	ORF2p	10090 [Organism: house mouse] [Scientific Name: Mus musculus]	96.569	583	20	0	1	583	1	583	0.998288	0	1128	98.28		superfamily	413489	518	583	65	1.21e-18	85.0354	cl02808	RT_like superfamily	-
MSTRG.16165	chr3:109250832-109264244	MSTRG.16165.1	multi-exonic	MSTRG.16165.1_84	None	1476	492	57.65 kDa	None	None	L1Md_F	LINE1	SHD82720.1	Retron-type Reverse transcriptase	83555 [Organism: Chlamydia abortus] Scientific Name: Chlamydia abortus]	97.352	491	13	0	1	491	305	795	0.997967	0	986	97.96		specific	238827	1	179	178	1.52e-36	134.341	cd01650	RT_nLTR_like	cl02808
MSTRG.16165	chr3:109250832-109264244	MSTRG.16165.1	multi-exonic	MSTRG.16165.1_84	None	1476	492	57.65 kDa	None	None	L1Md_F	LINE1	SFW05838.1	Retron-type Reverse transcriptase	83555 [Organism: Chlamydia abortus] Scientific Name: Chlamydia abortus]	98.413	252	4	0	1	252	60	311	0.512195	1.52e-156	492	98.81		specific	238827	1	179	178	1.52e-36	134.341	cd01650	RT_nLTR_like	cl02808
MSTRG.16165	chr3:109250832-109264244	MSTRG.16165.1	multi-exonic	MSTRG.16165.1_85	None	567	189	22.11 kDa	None	None	L1Md_F	LINE1	SFW05840.1	Retron-type Reverse transcriptase	83555 [Organism: Chlamydia abortus] Scientific Name: Chlamydia abortus]	97.861	187	4	0	1	187	107	293	0.989418	6.79e-132	382	98.4		specific	400570	155	172	17	0.000666408	35.7313	pfam08333	DUF1725	cl07081
MSTRG.16427	chr3:145922806-145938215	MSTRG.16427.1	multi-exonic	MSTRG.16427.1_35	ORF overlap	645	215	22.65 kDa	None	Exon overlap Bcl10	None	None	NA	NA	NA	NA	NA	NA	NA	NA	NA	NA	NA	0	NA	NA	NA		NA	NA	NA	NA	0	NA	NA	NA	NA	NA
MSTRG.16751	chr4:39040465-39054847	MSTRG.16751.1	mono-exonic	MSTRG.16751.1_6	None	1368	456	51.62 kDa	None	None	MMERVK10c-int	ERVK	SFW07159.1	Reverse transcriptase (RNA-dependent DNA polymerase)	83555 [Organism: Chlamydia abortus] Scientific Name: Chlamydia abortus]	89.112	349	33	1	57	400	38	386	0.765351	0	640	93.7		superfamily	413489	55	236	181	8e-95	284.561	cl02808	RT_like superfamily	-
MSTRG.16751	chr4:39040465-39054847	MSTRG.16751.1	mono-exonic	MSTRG.16751.1_6	None	1368	456	51.62 kDa	None	None	MMERVK10c-int	ERVK	SFW07159.1	Reverse transcriptase (RNA-dependent DNA polymerase)	83555 [Organism: Chlamydia abortus] Scientific Name: Chlamydia abortus]	89.112	349	33	1	57	400	38	386	0.765351	0	640	93.7		specific	399655	243	303	60	1.84e-31	114.719	pfam06817	RVT_thumb	cl06055
MSTRG.16751	chr4:39040465-39054847	MSTRG.16751.1	mono-exonic	MSTRG.16751.1_183	None	996	332	38.46 kDa	None	None	L1Md_A	LINE1	CRH55763.1	L1 transposable element	813 [Organism: Chlamydia trachomatis] [Scientific Name: Chlamydia trachomatis]	94.562	331	18	0	1	331	41	371	0.996988	0	636	97.89		superfamily	397235	151	248	97	4.34e-21	86.3732	cl25509	Transposase_22 superfamily	-
MSTRG.16751	chr4:39040465-39054847	MSTRG.16751.1	mono-exonic	MSTRG.16751.1_183	None	996	332	38.46 kDa	None	None	L1Md_A	LINE1	CRH55763.1	L1 transposable element	813 [Organism: Chlamydia trachomatis] [Scientific Name: Chlamydia trachomatis]	94.562	331	18	0	1	331	41	371	0.996988	0	636	97.89		superfamily	407521	252	315	63	1.91e-13	64.3541	cl38762	Tnp_22_dsRBD superfamily	-
MSTRG.16751	chr4:39040465-39054847	MSTRG.16751.1	mono-exonic	MSTRG.16751.1_183	None	996	332	38.46 kDa	None	None	L1Md_A	LINE1	CRH55763.1	L1 transposable element	813 [Organism: Chlamydia trachomatis] [Scientific Name: Chlamydia trachomatis]	94.562	331	18	0	1	331	41	371	0.996988	0	636	97.89		superfamily	237177	10	143	133	0.000814857	40.917	cl36166	PRK12704 superfamily	-
MSTRG.16751	chr4:39040465-39054847	MSTRG.16751.1	mono-exonic	MSTRG.16751.1_247	None	1161	387	43.03 kDa	None	None	MMERVK10c-int	ERVK	SFW07158.1	Integrase core domain	83555 [Organism: Chlamydia abortus] Scientific Name: Chlamydia abortus]	97.409	386	10	0	1	386	73	458	0.997416	0	783	98.45		superfamily	417494	57	177	120	1.85e-31	115.898	cl14782	RNase_H_like superfamily	-
MSTRG.16751	chr4:39040465-39054847	MSTRG.16751.1	mono-exonic	MSTRG.16751.1_247	None	1161	387	43.03 kDa	None	None	MMERVK10c-int	ERVK	SFW07158.1	Integrase core domain	83555 [Organism: Chlamydia abortus] Scientific Name: Chlamydia abortus]	97.409	386	10	0	1	386	73	458	0.997416	0	783	98.45		specific	395538	242	336	94	2.4e-21	87.7664	pfam00665	rve	cl21549
MSTRG.16751	chr4:39040465-39054847	MSTRG.16751.1	mono-exonic	MSTRG.16751.1_247	None	1161	387	43.03 kDa	None	None	MMERVK10c-int	ERVK	SFW07158.1	Integrase core domain	83555 [Organism: Chlamydia abortus] Scientific Name: Chlamydia abortus]	97.409	386	10	0	1	386	73	458	0.997416	0	783	98.45		specific	396557	190	225	35	2.11e-11	58.0951	pfam02022	Integrase_Zn	cl08339
MSTRG.16751	chr4:39040465-39054847	MSTRG.16751.1	mono-exonic	MSTRG.16751.1_289	None	1188	396	45.77 kDa	None	None	L1Md_A	LINE1	SGW38391.1	Exonuclease III	83555 [Organism: Chlamydia abortus] Scientific Name: Chlamydia abortus]	95.685	394	17	0	1	394	1	394	0.994949	0	778	97.97		specific	197310	17	242	225	5.01e-62	199.5	cd09076	L1-EN	cl00490
MSTRG.16788	chr4:41497925-41503577	MSTRG.16788.1	mono-exonic	MSTRG.16788.1_20	5' end	885	295	32.61 kDa	None	Exon overlap Myorg	SINE_B3	SINE_B2	EDM14224.1	rCG23351	10116 [Organism: Norway rat] [Scientific Name: Rattus norvegicus]	64.706	34	12	0	260	293	19	52	0.115254	0.002	47.8	73.53		NA	NA	NA	NA	0	NA	NA	NA	NA	NA
MSTRG.17864	chr4:137543601-137562611	MSTRG.17864.1	multi-exonic	MSTRG.17864.1_21	None	771	257	28.50 kDa	None	Exon overlap Hspg2	None	None	NA	NA	NA	NA	NA	NA	NA	NA	NA	NA	NA	0	NA	NA	NA		NA	NA	NA	NA	0	NA	NA	NA	NA	NA
MSTRG.18237	chr4:155729095-155734914	MSTRG.18237.1	mono-exonic	MSTRG.18237.1_51	5' end	540	180	18.43 kDa	1500002C15Rik (single exon, non-coding)	Exon overlap Ssu72	None	None	NA	NA	NA	NA	NA	NA	NA	NA	NA	NA	NA	0	NA	NA	NA		NA	NA	NA	NA	0	NA	NA	NA	NA	NA
MSTRG.18237	chr4:155729095-155734914	MSTRG.18237.1	mono-exonic	MSTRG.18237.1_55	5' end	156	468	16.85 kDa	1500002C15Rik (single exon, non-coding)	Exon overlap Ssu72	None	None	NA	NA	NA	NA	NA	NA	NA	NA	NA	NA	NA	0	NA	NA	NA		NA	NA	NA	NA	0	NA	NA	NA	NA	NA
MSTRG.18237	chr4:155729095-155734914	MSTRG.18237.1	mono-exonic	MSTRG.18237.1_86	5' end	168	504	18.03 kDa	1500002C15Rik (single exon, non-coding)	Exon overlap Ssu72	None	None	BAB23824.1	1500002C15Rik	10090 [Organism: house mouse] [Scientific Name: Mus musculus]	100	113	0	0	55	167	43	155	0.672619	3.46e-46	159	100		NA	NA	NA	NA	0	NA	NA	NA	NA	NA
MSTRG.18237	chr4:155729095-155734914	MSTRG.18237.2	mono-exonic	MSTRG.18237.2_1	5' end	539	1617	61.41 kDa	1500002C15Rik (single exon, non-coding)	Exon overlap Ssu72	None	None	NP_849534.2	Atad3a	10090 [Organism: house mouse] [Scientific Name: Mus musculus]	99.814	538	1	0	1	538	54	591	0.998145	0	935	100		specific	410920	270	419	149	2.13e-107	317.161	cd19512	RecA-like_ATAD3-like	cl38936
MSTRG.18237	chr4:155729095-155734914	MSTRG.18237.2	mono-exonic	MSTRG.18237.2_1	5' end	539	1617	61.41 kDa	1500002C15Rik (single exon, non-coding)	Exon overlap Ssu72	None	None	NP_849534.2	Atad3a	10090 [Organism: house mouse] [Scientific Name: Mus musculus]	99.814	538	1	0	1	538	54	591	0.998145	0	935	100		specific	403305	1	232	231	1.47e-102	309.22	pfam12037	DUF3523	cl37828
MSTRG.18237	chr4:155729095-155734914	MSTRG.18237.2	mono-exonic	MSTRG.18237.2_12	5' end	212	636	22.72 kDa	1500002C15Rik (single exon, non-coding)	Exon overlap Ssu72	None	None	NA	NA	NA	NA	NA	NA	NA	NA	NA	NA	NA	0	NA	NA	NA		NA	NA	NA	NA	0	NA	NA	NA	NA	NA
MSTRG.18237	chr4:155729095-155734914	MSTRG.18237.2	mono-exonic	MSTRG.18237.2_39	5' end	152	456	16.52 kDa	1500002C15Rik (single exon, non-coding)	Exon overlap Ssu72	None	None	BAB23824.1	1500002C15Rik	10090 [Organism: house mouse] [Scientific Name: Mus musculus]	100	33	0	0	119	151	123	155	0.217105	2.01e-13	74.3	100		NA	NA	NA	NA	0	NA	NA	NA	NA	NA
MSTRG.18237	chr4:155729095-155734914	MSTRG.18237.2	mono-exonic	MSTRG.18237.2_114	5' end	175	525	20.12 kDa	1500002C15Rik (single exon, non-coding)	Exon overlap Ssu72	None	None	NA	NA	NA	NA	NA	NA	NA	NA	NA	NA	NA	0	NA	NA	NA		NA	NA	NA	NA	0	NA	NA	NA	NA	NA
MSTRG.18237	chr4:155729095-155734914	MSTRG.18237.2	mono-exonic	MSTRG.18237.2_177	5' end	196	588	20.80 kDa	1500002C15Rik (single exon, non-coding)	Exon overlap Ssu72	None	None	NA	NA	NA	NA	NA	NA	NA	NA	NA	NA	NA	0	NA	NA	NA		NA	NA	NA	NA	0	NA	NA	NA	NA	NA
MSTRG.18237	chr4:155729095-155734914	MSTRG.18237.2	mono-exonic	MSTRG.18237.2_207	5' end	156	468	16.85 kDa	1500002C15Rik (single exon, non-coding)	Exon overlap Ssu72	None	None	NA	NA	NA	NA	NA	NA	NA	NA	NA	NA	NA	0	NA	NA	NA		NA	NA	NA	NA	0	NA	NA	NA	NA	NA
MSTRG.18237	chr4:155729095-155734914	MSTRG.18237.3	mono-exonic	MSTRG.18237.3_1	5' end	156	468	16.77 kDa	1500002C15Rik (single exon, non-coding)	Exon overlap Ssu72	None	None	BAB23824.1	1500002C15Rik	10090 [Organism: house mouse] [Scientific Name: Mus musculus]	100	113	0	0	43	155	43	155	0.724359	2.22e-46	159	100		NA	NA	NA	NA	0	NA	NA	NA	NA	NA
MSTRG.18237	chr4:155729095-155734914	MSTRG.18237.3	mono-exonic	MSTRG.18237.3_51	5' end	160	480	16.54 kDa	1500002C15Rik (single exon, non-coding)	Exon overlap Ssu72	None	None	NA	NA	NA	NA	NA	NA	NA	NA	NA	NA	NA	0	NA	NA	NA		NA	NA	NA	NA	0	NA	NA	NA	NA	NA
MSTRG.18237	chr4:155729095-155734914	MSTRG.18237.3	mono-exonic	MSTRG.18237.3_55	5' end	156	468	16.85 kDa	1500002C15Rik (single exon, non-coding)	Exon overlap Ssu72	None	None	NA	NA	NA	NA	NA	NA	NA	NA	NA	NA	NA	0	NA	NA	NA		NA	NA	NA	NA	0	NA	NA	NA	NA	NA
MSTRG.18237	chr4:155729095-155734914	MSTRG.18237.4	mono-exonic	MSTRG.18237.4_1	5' end	156	468	16.77 kDa	1500002C15Rik (single exon, non-coding)	Exon overlap Ssu72	None	None	BAB23824.1	1500002C15Rik	10090 [Organism: house mouse] [Scientific Name: Mus musculus]	100	113	0	0	43	155	43	155	0.724359	2.22e-46	159	100		NA	NA	NA	NA	0	NA	NA	NA	NA	NA
MSTRG.18237	chr4:155729095-155734914	MSTRG.18237.4	mono-exonic	MSTRG.18237.4_20	5' end	180	540	18.73 kDa	1500002C15Rik (single exon, non-coding)	Exon overlap Ssu72	None	None	NA	NA	NA	NA	NA	NA	NA	NA	NA	NA	NA	0	NA	NA	NA		NA	NA	NA	NA	0	NA	NA	NA	NA	NA
MSTRG.18237	chr4:155729095-155734914	MSTRG.18237.6	mono-exonic	MSTRG.18237.6_18	5' end	249	747	26.54 kDa	1500002C15Rik (single exon, non-coding)	Exon overlap Ssu72	None	None	NA	NA	NA	NA	NA	NA	NA	NA	NA	NA	NA	0	NA	NA	NA		NA	NA	NA	NA	0	NA	NA	NA	NA	NA
MSTRG.18237	chr4:155729095-155734914	MSTRG.18237.5	mono-exonic	MSTRG.18237.5_1	5' end	253	759	29.16 kDa	1500002C15Rik (single exon, non-coding)	Exon overlap Ssu72	None	None	BAD32419.1	Atad3a	10090 [Organism: house mouse] [Scientific Name: Mus musculus]	99.598	249	1	0	1	249	68	316	0.98419	2.79e-104	322	100		specific	403305	1	232	231	1.12e-92	273.396	pfam12037	DUF3523	cl37828
MSTRG.18237	chr4:155729095-155734914	MSTRG.18237.5	mono-exonic	MSTRG.18237.5_23	5' end	196	588	20.80 kDa	1500002C15Rik (single exon, non-coding)	Exon overlap Ssu72	None	None	NA	NA	NA	NA	NA	NA	NA	NA	NA	NA	NA	0	NA	NA	NA		NA	NA	NA	NA	0	NA	NA	NA	NA	NA
MSTRG.18237	chr4:155729095-155734914	MSTRG.18237.5	mono-exonic	MSTRG.18237.5_53	5' end	276	828	31.25 kDa	1500002C15Rik (single exon, non-coding)	Exon overlap Ssu72	None	None	NP_849534.2	Atad3a	10090 [Organism: house mouse] [Scientific Name: Mus musculus]	98.545	275	4	0	1	275	317	591	0.996377	0	574	99.27		specific	410920	7	156	149	4.21e-112	319.472	cd19512	RecA-like_ATAD3-like	cl38936
MSTRG.18237	chr4:155729095-155734914	MSTRG.18237.5	mono-exonic	MSTRG.18237.5_64	5' end	178	534	19.20 kDa	1500002C15Rik (single exon, non-coding)	Exon overlap Ssu72	None	None	NA	NA	NA	NA	NA	NA	NA	NA	NA	NA	NA	0	NA	NA	NA		NA	NA	NA	NA	0	NA	NA	NA	NA	NA
MSTRG.18237	chr4:155729095-155734914	MSTRG.18237.8	mono-exonic	MSTRG.18237.8_14	5' end	161	483	18.46 kDa	1500002C15Rik (single exon, non-coding)	Exon overlap Ssu72	None	None	XP_036019463.1	Atad3a	10090 [Organism: house mouse] [Scientific Name: Mus musculus]	99.375	160	1	0	1	160	256	415	0.993789	5.17e-115	342	100		superfamily	422963	1	41	40	7.63e-23	87.9672	cl38936	P-loop_NTPase superfamily	-
MSTRG.18237	chr4:155729095-155734914	MSTRG.18237.8	mono-exonic	MSTRG.18237.8_14	5' end	161	483	18.46 kDa	1500002C15Rik (single exon, non-coding)	Exon overlap Ssu72	None	None	XP_036019463.1	Atad3a	10090 [Organism: house mouse] [Scientific Name: Mus musculus]	99.375	160	1	0	1	160	256	415	0.993789	5.17e-115	342	100		superfamily	224144	20	154	134	5.95e-11	59.0556	cl34192	COG1223 superfamily	-
MSTRG.18237	chr4:155729095-155734914	MSTRG.18237.9	mono-exonic	MSTRG.18237.9_10	5' end	203	609	23.67 kDa	1500002C15Rik (single exon, non-coding)	Exon overlap Ssu72	None	None	BAD32419.1	Atad3a	10090 [Organism: house mouse] [Scientific Name: Mus musculus]	97.512	201	5	0	1	201	68	268	0.990148	9.74e-65	218	98.01		superfamily	403305	1	196	195	1.73e-66	204.831	cl37828	DUF3523 superfamily	-
MSTRG.18237	chr4:155729095-155734914	MSTRG.18237.9	mono-exonic	MSTRG.18237.9_25	5' end	187	561	21.45 kDa	1500002C15Rik (single exon, non-coding)	Exon overlap Ssu72	None	None	XP_036019463.1	Atad3a	10090 [Organism: house mouse] [Scientific Name: Mus musculus]	99.462	186	1	0	1	186	230	415	0.994652	1.41e-134	393	100		superfamily	422963	1	67	66	1.14e-42	139.969	cl38936	P-loop_NTPase superfamily	-
MSTRG.18237	chr4:155729095-155734914	MSTRG.18237.9	mono-exonic	MSTRG.18237.9_25	5' end	187	561	21.45 kDa	1500002C15Rik (single exon, non-coding)	Exon overlap Ssu72	None	None	XP_036019463.1	Atad3a	10090 [Organism: house mouse] [Scientific Name: Mus musculus]	99.462	186	1	0	1	186	230	415	0.994652	1.41e-134	393	100		superfamily	224144	1	180	179	9.08e-13	65.2188	cl34192	COG1223 superfamily	-
MSTRG.18443	chr5:23314315-23339753	MSTRG.18443.1	multi-exonic	MSTRG.18443.1_21	None	8763	2921	325.16 kDa	Gm17434 (XM_017321194.2 )	Exon overlap 42951	None	None	XP_021029694.1	LOC110303098	10089 [Organism: Ryukyu mouse] [Scientific Name: Mus caroli]	61.417	2597	818	44	17	2533	2178	4670	0.889079	0	2682	69.85		NA	NA	NA	NA	0	NA	NA	NA	NA	NA
MSTRG.18443	chr5:23314315-23339753	MSTRG.18443.1	multi-exonic	MSTRG.18443.1_144	None	1647	549	61.81 kDa	Gm17434 (XM_017321194.2 ) ORF in 3'UTR	Exon overlap 42951	None	None	XP_017176683.2	Gm17434	10090 [Organism: house mouse] [Scientific Name: Mus musculus]	100	502	0	0	47	548	1	502	0.91439	0	946	100		NA	NA	NA	NA	0	NA	NA	NA	NA	NA
MSTRG.18450	chr5:23727271-23730165	MSTRG.18450.1	mono-exonic	MSTRG.18450.1_1	None	567	189	20.86 kDa	None	None	IAPEz-int	ERVK	XP_036021566.1	Gm54326	10090 [Organism: house mouse] [Scientific Name: Mus musculus]	88.421	95	7	1	1	91	75	169	0.502646	7.45e-40	154	92.63		superfamily	412409	125	182	57	1.47e-09	53.4468	cl00493	trimeric_dUTPase superfamily	-
MSTRG.18450	chr5:23727271-23730165	MSTRG.18450.1	mono-exonic	MSTRG.18450.1_1	None	567	189	20.86 kDa	None	None	IAPEz-int	ERVK	XP_036021566.1	Gm54326	10090 [Organism: house mouse] [Scientific Name: Mus musculus]	88.421	95	7	1	1	91	75	169	0.502646	7.45e-40	154	92.63		superfamily	395483	92	130	38	0.00128074	37.9112	cl02908	Gag_p24 superfamily	-
MSTRG.18450	chr5:23727271-23730165	MSTRG.18450.1	mono-exonic	MSTRG.18450.1_9	None	627	209	23.60 kDa	None	None	IAPEz-int	ERVK	EDL21115.1	mCG4448	10090 [Organism: house mouse] [Scientific Name: Mus musculus]	91.429	105	9	0	8	112	1	105	0.502392	1.3e-61	197	94.29		NA	NA	NA	NA	0	NA	NA	NA	NA	NA
MSTRG.18450	chr5:23727271-23730165	MSTRG.18450.1	mono-exonic	MSTRG.18450.1_57	None	726	242	27.01 kDa	None	None	IAPEz-int	ERVK	SFW03938.1	Integrase core domain	83555 [Organism: Chlamydia abortus] Scientific Name: Chlamydia abortus]	93.697	238	15	0	4	241	77	314	0.983471	3.54e-169	479	97.48		superfamily	411202	12	116	104	8.12e-19	83.0239	cl41329	transpos_IS481 superfamily	-
MSTRG.18450	chr5:23727271-23730165	MSTRG.18450.1	mono-exonic	MSTRG.18450.1_57	None	726	242	27.01 kDa	None	None	IAPEz-int	ERVK	SFW03938.1	Integrase core domain	83555 [Organism: Chlamydia abortus] Scientific Name: Chlamydia abortus]	93.697	238	15	0	4	241	77	314	0.983471	3.54e-169	479	97.48		specific	395437	156	201	45	6.52e-14	63.9504	pfam00552	IN_DBD_C	cl02895
MSTRG.18522	chr5:27951998-27977335	MSTRG.18522.3	multi-exonic	MSTRG.18522.3_184	None	10431	3477	387.82 kDa	None	None	None	None	XP_006514423.1	LOC102635990 c2ORF16 like	10090 [Organism: house mouse] [Scientific Name: Mus musculus]	60.204	2646	857	42	524	3081	2203	4740	0.761001	0	2701	69.5		NA	NA	NA	NA	0	NA	NA	NA	NA	NA
MSTRG.18522	chr5:27951998-27977335	MSTRG.18522.1	multi-exonic	MSTRG.18522.1_183	None	10587	3529	393.94 kDa	None	None	None	None	XP_006514425.1	LOC102635990 c2ORF16 like	10090 [Organism: house mouse] [Scientific Name: Mus musculus]	60.204	2646	857	42	576	3133	2144	4681	0.749787	0	2699	69.5		NA	NA	NA	NA	0	NA	NA	NA	NA	NA
MSTRG.18522	chr5:27951998-27977335	MSTRG.18522.2	multi-exonic	MSTRG.18522.2_185	None	10455	3485	388.83 kDa	None	None	None	None	XP_006514423.1	LOC102635990 c2ORF16 like	10090 [Organism: house mouse] [Scientific Name: Mus musculus]	60.204	2646	857	42	532	3089	2203	4740	0.759254	0	2701	69.5		NA	NA	NA	NA	0	NA	NA	NA	NA	NA
MSTRG.18547	chr5:30040914-30054793	MSTRG.18547.1	mono-exonic	MSTRG.18547.1_84	None	855	285	32.95 kDa	None	None	L1Md_F2	LINE1	SFW04818.1	TPA exp gag protein	10090 [Organism: house mouse] [Scientific Name: Mus musculus]	96.797	281	9	0	1	281	1	281	0.985965	0	565	98.22		specific	197310	17	242	225	1.9e-66	207.204	cd09076	L1-EN	cl00490
MSTRG.18547	chr5:30040914-30054793	MSTRG.18547.1	mono-exonic	MSTRG.18547.1_152	None	642	214	22.83 kDa	None	None	MMERVK9E_I-int	ERVK	SFW04818.1	TPA exp gag protein	10090 [Organism: house mouse] [Scientific Name: Mus musculus]	73.723	137	36	0	5	141	308	444	0.640187	4.13e-65	219	82.48		superfamily	395483	19	134	115	6.61e-26	99.1579	cl02908	Gag_p24 superfamily	-
MSTRG.18547	chr5:30040914-30054793	MSTRG.18547.1	mono-exonic	MSTRG.18547.1_154	None	615	205	22.15 kDa	None	None	MMERVK9E_I-int	ERVK	BAF81989.1	pro	10090 [Organism: house mouse] [Scientific Name: Mus musculus]	75.98	204	49	0	1	204	54	257	0.995122	5.07e-103	310	83.33		specific	133149	131	204	73	4.28e-24	90.7885	cd05482	HIV_retropepsin_like	cl11403
MSTRG.18547	chr5:30040914-30054793	MSTRG.18547.1	mono-exonic	MSTRG.18547.1_154	None	615	205	22.15 kDa	None	None	MMERVK9E_I-int	ERVK	BAF81989.1	pro	10090 [Organism: house mouse] [Scientific Name: Mus musculus]	75.98	204	49	0	1	204	54	257	0.995122	5.07e-103	310	83.33		superfamily	412409	2	110	108	1.06e-22	88.4999	cl00493	trimeric_dUTPase superfamily	-
MSTRG.18547	chr5:30040914-30054793	MSTRG.18547.1	mono-exonic	MSTRG.18547.1_174	None	735	245	29.11 kDa	None	None	L1Md_F2	LINE1	WP_057184884.1	Reverse transcriptase family protein	813 [Organism: Chlamydia trachomatis] [Scientific Name: Chlamydia trachomatis]	93.033	244	17	0	1	244	88	331	0.995918	3.36e-166	475	96.72		superfamily	413489	1	70	69	1.95e-09	55.7602	cl02808	RT_like superfamily	-
MSTRG.18547	chr5:30040914-30054793	MSTRG.18547.1	mono-exonic	MSTRG.18547.1_263	None	813	271	31.37 kDa	None	None	L1Md_F2	LINE1	CRH55763.1	L1 transposable element	813 [Organism: Chlamydia trachomatis] [Scientific Name: Chlamydia trachomatis]	95.926	270	11	0	1	270	102	371	0.99631	0	533	97.78		superfamily	397235	90	187	97	1.15e-24	94.4624	cl25509	Transposase_22 superfamily	-
MSTRG.18547	chr5:30040914-30054793	MSTRG.18547.1	mono-exonic	MSTRG.18547.1_263	None	813	271	31.37 kDa	None	None	L1Md_F2	LINE1	CRH55763.1	L1 transposable element	813 [Organism: Chlamydia trachomatis] [Scientific Name: Chlamydia trachomatis]	95.926	270	11	0	1	270	102	371	0.99631	0	533	97.78		superfamily	407521	191	254	63	2.98e-13	63.1985	cl38762	Tnp_22_dsRBD superfamily	-
MSTRG.18547	chr5:30040914-30054793	MSTRG.18547.1	mono-exonic	MSTRG.18547.1_272	None	648	216	24.80 kDa	None	None	L1Md_F2	LINE1	SBW38362.1	Reverse transcriptase (RNA-dependent DNA polymerase)	5821 [Organism: Plasmodium berghei] [Scientific Name: Plasmodium berghei]	94.286	210	12	0	1	210	118	327	0.972222	1.71e-141	412	97.14		specific	238827	89	205	116	1.86e-36	127.022	cd01650	RT_nLTR_like	cl02808
MSTRG.18591	chr5:31350666-31392025	MSTRG.18591.1	multi-exonic	MSTRG.18591.1_12	None	960	320	37.69 kDa	None	None	L1_Mm	LINE1	SBW38361.1	Protein of unknown function (DUF1725)	5821 [Organism: Plasmodium berghei] [Scientific Name: Plasmodium berghei]	92.963	270	19	0	1	270	260	529	0.84375	0	523	96.67		NA	NA	NA	NA	0	NA	NA	NA	NA	NA
MSTRG.18714	chr5:36796487-36798363	MSTRG.18714.1	mono-exonic	MSTRG.18714.1_1	ORF overlap	540	180	18.91 kDa	None	Promoter overlap Mrfap1	None	None	BAB29880.1	Mrfap1	10090 [Organism: house mouse] [Scientific Name: Mus musculus]	100	145	0	0	35	179	29	173	0.805556	8.07e-91	273	100		NA	NA	NA	NA	0	NA	NA	NA	NA	NA
MSTRG.18854	chr5:58483085-58484342	MSTRG.18854.1	mono-exonic	MSTRG.18854.1_10	None	588	196	22.28 kDa	None	None	L1Md_F2	LINE1	SFW05975.1	L1 transposable element	83555 [Organism: Chlamydia abortus] Scientific Name: Chlamydia abortus]	93.367	196	11	1	1	194	1	196	1	2.25e-123	362	96.43		superfamily	237177	48	182	134	1e-05	45.1542	cl36166	PRK12704 superfamily	-
MSTRG.18880	chr5:64896585-64904364	MSTRG.18880.1	multi-exonic	MSTRG.18880.1_12	None	546	182	20.35 kDa	None	None	None	None	NP_001139507.1	Tlr10	10116 [Organism: Norway rat] [Scientific Name: Rattus norvegicus]	73.457	162	38	1	1	157	557	718	0.89011	4.47e-65	224	83.33		superfamily	419986	77	151	74	2.17e-11	58.4888	cl23749	TIR_2 superfamily	-
MSTRG.18880	chr5:64896585-64904364	MSTRG.18880.1	multi-exonic	MSTRG.18880.1_16	None	576	192	22.38 kDa	None	None	None	None	XP_032772399.1	Tlr10	10117 [Organism: black rat] [Scientific Name: Rattus rattus]	56.354	181	17	2	10	190	1	119	0.942708	8.21e-37	147	59.67		NA	NA	NA	NA	0	NA	NA	NA	NA	NA
MSTRG.18880	chr5:64896585-64904364	MSTRG.18880.2	multi-exonic	MSTRG.18880.2_35	None	546	182	20.35 kDa	None	None	None	None	NP_001139507.1	Tlr10	10116 [Organism: Norway rat] [Scientific Name: Rattus norvegicus]	73.457	162	38	1	1	157	557	718	0.89011	4.47e-65	224	83.33		superfamily	419986	77	151	74	2.17e-11	58.4888	cl23749	TIR_2 superfamily	-
MSTRG.18880	chr5:64896585-64904364	MSTRG.18880.2	multi-exonic	MSTRG.18880.2_44	None	576	192	22.38 kDa	None	None	None	None	XP_032772399.1	Tlr10	10117 [Organism: black rat] [Scientific Name: Rattus rattus]	56.354	181	17	2	10	190	1	119	0.942708	8.21e-37	147	59.67		NA	NA	NA	NA	0	NA	NA	NA	NA	NA
MSTRG.19206	chr5:104569025-104586349	MSTRG.19206.2	multi-exonic	MSTRG.19206.2_99	None	1194	398	45.76 kDa	Zfp33b (XM_030254795.1)	None	None	None	XP_036021574.1	Gm31526	10090 [Organism: house mouse] [Scientific Name: Mus musculus]	74.279	416	79	1	1	388	1	416	1.04523	0	606	81.97		specific	227381	99	294	195	2.77e-08	55.4722	COG5048	COG5048	cl34881
MSTRG.19206	chr5:104569025-104586349	MSTRG.19206.2	multi-exonic	MSTRG.19206.2_99	None	1194	398	45.76 kDa	Zfp33b (XM_030254795.1)	None	None	None	XP_036021574.1	Gm31526	10090 [Organism: house mouse] [Scientific Name: Mus musculus]	74.279	416	79	1	1	388	1	416	1.04523	0	606	81.97		specific	404364	297	321	24	0.00047456	36.9433	pfam13465	zf-H2C2_2	cl22375
MSTRG.19206	chr5:104569025-104586349	MSTRG.19206.2	multi-exonic	MSTRG.19206.2_158	None	1422	474	54.61 kDa	Zfp33b (XM_030254795.1)	None	None	None	XP_028640225.1	Zinc finger protein 844-like (LOC114636116)	491861 [Organism: ] [Scientific Name: Grammomys surdaster]	65.172	379	123	1	11	389	1	370	0.799578	1.68e-161	477	78.36		specific	396083	13	53	40	3.49e-20	83.2203	pfam01352	KRAB	cl02581
MSTRG.19206	chr5:104569025-104586349	MSTRG.19206.1	multi-exonic	MSTRG.19206.1_31	None	1314	438	50.55 kDa	Zfp33b (XM_030254795.1)	None	None	None	XP_028630470.1	Zinc finger protein 844-like (LOC114626982)	491861 [Organism: ] [Scientific Name: Grammomys surdaster]	64.543	361	128	0	17	377	24	384	0.824201	1.04e-149	445	79.22		NA	NA	NA	NA	0	NA	NA	NA	NA	NA
MSTRG.19206	chr5:104569025-104586349	MSTRG.19206.1	multi-exonic	MSTRG.19206.1_161	None	1332	444	51.43 kDa	Zfp33b (XM_030254795.1)	None	None	None	XP_036021295.1	Zfp951	10090 [Organism: house mouse] [Scientific Name: Mus musculus]	76.267	434	103	0	1	434	1	434	0.977477	0	666	85.71		specific	396083	13	49	36	6.31e-20	82.4499	pfam01352	KRAB	cl02581
MSTRG.19206	chr5:104569025-104586349	MSTRG.19206.1	multi-exonic	MSTRG.19206.1_161	None	1332	444	51.43 kDa	Zfp33b (XM_030254795.1)	None	None	None	XP_036021295.1	Zfp951	10090 [Organism: house mouse] [Scientific Name: Mus musculus]	76.267	434	103	0	1	434	1	434	0.977477	0	666	85.71		specific	227381	159	340	181	1.84e-07	53.161	COG5048	COG5048	cl34881
MSTRG.19206	chr5:104569025-104586349	MSTRG.19206.1	multi-exonic	MSTRG.19206.1_161	None	1332	444	51.43 kDa	Zfp33b (XM_030254795.1)	None	None	None	XP_036021295.1	Zfp951	10090 [Organism: house mouse] [Scientific Name: Mus musculus]	76.267	434	103	0	1	434	1	434	0.977477	0	666	85.71		specific	404364	343	367	24	0.00030466	37.7137	pfam13465	zf-H2C2_2	cl22375
MSTRG.19206	chr5:104569025-104586349	MSTRG.19206.3	multi-exonic	MSTRG.19206.3_10	None	1332	444	51.43 kDa	Zfp33b (XM_030254795.1)	None	None	None	XP_036021295.1	Zfp951	10090 [Organism: house mouse] [Scientific Name: Mus musculus]	76.267	434	103	0	1	434	1	434	0.977477	0	666	85.71		specific	396083	13	49	36	6.31e-20	82.4499	pfam01352	KRAB	cl02581
MSTRG.19206	chr5:104569025-104586349	MSTRG.19206.3	multi-exonic	MSTRG.19206.3_10	None	1332	444	51.43 kDa	Zfp33b (XM_030254795.1)	None	None	None	XP_036021295.1	Zfp951	10090 [Organism: house mouse] [Scientific Name: Mus musculus]	76.267	434	103	0	1	434	1	434	0.977477	0	666	85.71		specific	227381	159	340	181	1.84e-07	53.161	COG5048	COG5048	cl34881
MSTRG.19206	chr5:104569025-104586349	MSTRG.19206.3	multi-exonic	MSTRG.19206.3_10	None	1332	444	51.43 kDa	Zfp33b (XM_030254795.1)	None	None	None	XP_036021295.1	Zfp951	10090 [Organism: house mouse] [Scientific Name: Mus musculus]	76.267	434	103	0	1	434	1	434	0.977477	0	666	85.71		specific	404364	343	367	24	0.00030466	37.7137	pfam13465	zf-H2C2_2	cl22375
MSTRG.19206	chr5:104569025-104586349	MSTRG.19206.3	multi-exonic	MSTRG.19206.3_57	None	1314	438	50.55 kDa	Zfp33b (XM_030254795.1)	None	None	None	XP_028630470.1	Zinc finger protein 844-like (LOC114626982)	491861 [Organism: ] [Scientific Name: Grammomys surdaster]	64.543	361	128	0	17	377	24	384	0.824201	1.04e-149	445	79.22		NA	NA	NA	NA	0	NA	NA	NA	NA	NA
MSTRG.19800	chr5:134914086-134919164	MSTRG.19800.1	multi-exonic	MSTRG.19800.1_4	None	723	241	26.75 kDa	None	Exon overlap Cldn13	None	None	NA	NA	NA	NA	NA	NA	NA	NA	NA	NA	NA	0	NA	NA	NA		NA	NA	NA	NA	0	NA	NA	NA	NA	NA
MSTRG.19905	chr5:138190469-138195237	MSTRG.19905.1	mono-exonic	MSTRG.19905.1_3	ORF overlap	588	196	21.46 kDa	None	Exon overlap Cnpy4 & Mblac1	None	None	NA	NA	NA	NA	NA	NA	NA	NA	NA	NA	NA	0	NA	NA	NA		NA	NA	NA	NA	0	NA	NA	NA	NA	NA
MSTRG.19905	chr5:138190469-138195237	MSTRG.19905.1	mono-exonic	MSTRG.19905.1_15	5' end	531	177	18.94 kDa	None	Exon overlap Cnpy4 & Mblac1	None	None	NA	NA	NA	NA	NA	NA	NA	NA	NA	NA	NA	0	NA	NA	NA		NA	NA	NA	NA	0	NA	NA	NA	NA	NA
MSTRG.19914	chr5:138315447-138321010	MSTRG.19914.1	mono-exonic	MSTRG.19914.1_1	None	540	180	21.17 kDa	None	None	L1Md_F3	LINE1	SFW05778.1	L1 transposable element	83555 [Organism: Chlamydia abortus] Scientific Name: Chlamydia abortus]	86.885	183	20	2	1	179	1	183	1.01667	7.35e-109	318	91.26		superfamily	397235	3	100	97	7.37e-20	79.4396	cl25509	Transposase_22 superfamily	-
MSTRG.19914	chr5:138315447-138321010	MSTRG.19914.1	mono-exonic	MSTRG.19914.1_1	None	540	180	21.17 kDa	None	None	L1Md_F3	LINE1	SFW05778.1	L1 transposable element	83555 [Organism: Chlamydia abortus] Scientific Name: Chlamydia abortus]	86.885	183	20	2	1	179	1	183	1.01667	7.35e-109	318	91.26		superfamily	407521	104	164	60	1.83e-06	43.5533	cl38762	Tnp_22_dsRBD superfamily	-
MSTRG.19914	chr5:138315447-138321010	MSTRG.19914.1	mono-exonic	MSTRG.19914.1_3	None	705	235	26.99 kDa	None	None	L1Md_F3	LINE1	SGW38391.1	Exonuclease III	83555 [Organism: Chlamydia abortus] Scientific Name: Chlamydia abortus]	95.299	234	11	0	1	234	119	352	0.995745	2.2e-152	443	97.01		specific	197310	2	124	122	1.81e-30	112.83	cd09076	L1-EN	cl00490
MSTRG.19914	chr5:138315447-138321010	MSTRG.19914.1	mono-exonic	MSTRG.19914.1_4	None	453	151	17.11 kDa	None	None	L1Md_F3	LINE1	WP_216596011.1	Reverse transcriptase family protein	813 [Organism: Chlamydia trachomatis] [Scientific Name: Chlamydia trachomatis]	94.667	150	8	0	1	150	163	312	0.993377	3.25e-95	292	96.67		superfamily	413489	89	149	60	1.92e-19	80.7982	cl02808	RT_like superfamily	-
MSTRG.19914	chr5:138315447-138321010	MSTRG.19914.1	mono-exonic	MSTRG.19914.1_65	None	696	232	27.12 kDa	None	None	L1Md_F3	LINE1	WP_080374804.1	DUF1725 domain-containing protein	813 [Organism: Chlamydia trachomatis] [Scientific Name: Chlamydia trachomatis]	84.279	229	35	1	1	228	68	296	0.987069	6.2e-128	376	88.21		NA	NA	NA	NA	0	NA	NA	NA	NA	NA
MSTRG.19914	chr5:138315447-138321010	MSTRG.19914.1	mono-exonic	MSTRG.19914.1_82	None	1224	408	46.75 kDa	None	None	L1Md_F3	LINE1	GGZ10838.1	Hypothetical protein GCM10010385 69480	68207 [Organism:] [Scientific Name: Streptomyces geysiriensis]	91.429	315	27	0	83	397	589	903	0.772059	0	562	93.65		specific	238827	93	212	119	7.48e-29	111.999	cd01650	RT_nLTR_like	cl02808
MSTRG.20005	chr5:143254209-143259505	MSTRG.20005.1	mono-exonic	MSTRG.20005.1_1	ORF overlap	519	173	16.98 kDa	None	Exon overlap Zfp316	None	None	NA	NA	NA	NA	NA	NA	NA	NA	NA	NA	NA	0	NA	NA	NA		NA	NA	NA	NA	0	NA	NA	NA	NA	NA
MSTRG.20005	chr5:143254209-143259505	MSTRG.20005.1	mono-exonic	MSTRG.20005.1_37	ORF overlap	669	223	24.18 kDa	None	Exon overlap Zfp316	None	None	NA	NA	NA	NA	NA	NA	NA	NA	NA	NA	NA	0	NA	NA	NA		NA	NA	NA	NA	0	NA	NA	NA	NA	NA
MSTRG.20005	chr5:143254209-143259505	MSTRG.20005.1	mono-exonic	MSTRG.20005.1_39	ORF overlap	783	261	28.55 kDa	None	Exon overlap Zfp316	None	None	NA	NA	NA	NA	NA	NA	NA	NA	NA	NA	NA	0	NA	NA	NA		NA	NA	NA	NA	0	NA	NA	NA	NA	NA
MSTRG.20005	chr5:143254209-143259505	MSTRG.20005.1	mono-exonic	MSTRG.20005.1_68	ORF overlap	585	195	20.79 kDa	None	Exon overlap Zfp316	None	None	NA	NA	NA	NA	NA	NA	NA	NA	NA	NA	NA	0	NA	NA	NA		NA	NA	NA	NA	0	NA	NA	NA	NA	NA
MSTRG.20005	chr5:143254209-143259505	MSTRG.20005.1	mono-exonic	MSTRG.20005.1_70	ORF overlap	537	179	18.83 kDa	None	Exon overlap Zfp316	None	None	XP_009563507.1	Zinc finger protein 585A-like (LOC104063063)	55661 [Organism: common cuckoo] [Scientific Name: Cuculus canorus]	68.293	41	13	0	21	61	208	248	0.22905	0.01	48.5	70.73		NA	NA	NA	NA	0	NA	NA	NA	NA	NA
MSTRG.20221	chr6:7566051-7568238	MSTRG.20221.1	multi-exonic	MSTRG.20221.1_13	None	1296	432	48.26 kDa	None	None	None	None	NA	NA	NA	NA	NA	NA	NA	NA	NA	NA	NA	0	NA	NA	NA		NA	NA	NA	NA	0	NA	NA	NA	NA	NA
MSTRG.20221	chr6:7566051-7568238	MSTRG.20221.1	multi-exonic	MSTRG.20221.1_17	None	537	179	19.96 kDa	None	None	None	None	NA	NA	NA	NA	NA	NA	NA	NA	NA	NA	NA	0	NA	NA	NA		NA	NA	NA	NA	0	NA	NA	NA	NA	NA
MSTRG.20221	chr6:7566051-7568238	MSTRG.20221.1	multi-exonic	MSTRG.20221.1_18	None	762	254	27.91 kDa	None	None	None	None	NA	NA	NA	NA	NA	NA	NA	NA	NA	NA	NA	0	NA	NA	NA		NA	NA	NA	NA	0	NA	NA	NA	NA	NA
MSTRG.20626	chr6:58330508-58339263	MSTRG.20626.1	mono-exonic	MSTRG.20626.1_6	None	744	248	27.62 kDa	None	None	IAPLTR3-int	ERVK	XP_027288878.1	IgE-binding protein-like (LOC107980247)	10029 [Organism: Chinese hamster] [Scientific Name: Cricetulus griseus]	61.966	234	80	4	1	225	1	234	0.943548	4.05e-79	250	76.92		superfamily	396766	5	84	79	2.41e-16	71.6004	cl03546	Gag_p10 superfamily	-
MSTRG.20655	chr6:68092807-68095757	MSTRG.20655.1	mono-exonic	MSTRG.20655.1_22	None	1305	435	50.77 kDa	None	None	L1Md_A	LINE1	SGW38391.1	Exonuclease III	83555 [Organism: Chlamydia abortus] Scientific Name: Chlamydia abortus]	91.962	423	33	1	1	422	1	423	0.972414	0	768	93.85		specific	197310	17	242	225	6.09e-61	197.959	cd09076	L1-EN	cl00490
MSTRG.20657	chr6:68772214-68779789	MSTRG.20657.1	mono-exonic	MSTRG.20657.1_36	None	624	208	23.91 kDa	None	None	L1Md_F2	LINE1	WP_057184884.1	Reverse transcriptase family protein	813 [Organism: Chlamydia trachomatis] [Scientific Name: Chlamydia trachomatis]	94.686	207	11	0	1	207	32	238	0.995192	3.01e-136	398	97.1		specific	238827	9	126	117	1.67e-30	111.614	cd01650	RT_nLTR_like	cl02808
MSTRG.20657	chr6:68772214-68779789	MSTRG.20657.1	mono-exonic	MSTRG.20657.1_110	None	1119	373	43.14 kDa	None	None	L1Md_F2	LINE1	SFW04777.1	Exonuclease III	83555 [Organism: Chlamydia abortus] Scientific Name: Chlamydia abortus]	91.398	372	31	1	1	372	1	371	0.997319	0	642	94.35		superfamily	397235	191	286	95	1.06e-19	82.9064	cl25509	Transposase_22 superfamily	-
MSTRG.20657	chr6:68772214-68779789	MSTRG.20657.1	mono-exonic	MSTRG.20657.1_110	None	1119	373	43.14 kDa	None	None	L1Md_F2	LINE1	SFW04777.1	Exonuclease III	83555 [Organism: Chlamydia abortus] Scientific Name: Chlamydia abortus]	91.398	372	31	1	1	372	1	371	0.997319	0	642	94.35		superfamily	407521	293	356	63	9.59e-10	54.3389	cl38762	Tnp_22_dsRBD superfamily	-
MSTRG.20657	chr6:68772214-68779789	MSTRG.20657.1	mono-exonic	MSTRG.20657.1_110	None	1119	373	43.14 kDa	None	None	L1Md_F2	LINE1	SFW04777.1	Exonuclease III	83555 [Organism: Chlamydia abortus] Scientific Name: Chlamydia abortus]	91.398	372	31	1	1	372	1	371	0.997319	0	642	94.35		superfamily	224117	60	197	137	2.81e-05	46.246	cl34174	Smc superfamily	-
MSTRG.20657	chr6:68772214-68779789	MSTRG.20657.1	mono-exonic	MSTRG.20657.1_111	None	1275	425	49.25 kDa	None	None	L1Md_F2	LINE1	SGW38391.1	Exonuclease III	83555 [Organism: Chlamydia abortus] Scientific Name: Chlamydia abortus]	94.353	425	23	1	1	424	1	425	1	0	817	96.47		specific	197310	17	242	225	2.59e-58	190.64	cd09076	L1-EN	cl00490
MSTRG.20657	chr6:68772214-68779789	MSTRG.20657.1	mono-exonic	MSTRG.20657.1_112	None	696	232	26.66 kDa	None	None	L1Md_F2	LINE1	NA	NA	NA	NA	NA	NA	NA	NA	NA	NA	NA	0	NA	NA	NA		superfamily	413489	85	213	128	9.34e-29	107.762	cl02808	RT_like superfamily	-
MSTRG.20657	chr6:68772214-68779789	MSTRG.20657.1	mono-exonic	MSTRG.20657.1_118	None	651	217	25.69 kDa	None	None	L1Md_F2	LINE1	NA	NA	NA	NA	NA	NA	NA	NA	NA	NA	NA	0	NA	NA	NA		NA	NA	NA	NA	0	NA	NA	NA	NA	NA
MSTRG.20790	chr6:85075985-85076809	MSTRG.20790.1	mono-exonic	MSTRG.20790.1_1	ORF overlap	567	189	20.81 kDa	None	Exon overlap MSTRG.20789	None	None	NA	NA	NA	NA	NA	NA	NA	NA	NA	NA	NA	0	NA	NA	NA		NA	NA	NA	NA	0	NA	NA	NA	NA	NA
MSTRG.20974	chr6:100562806-100570874	MSTRG.20974.1	mono-exonic	MSTRG.20974.1_62	ORF overlap	675	225	24.38 kDa	None	Promoter overlap MSTRG.20973	None	None	NA	NA	NA	NA	NA	NA	NA	NA	NA	NA	NA	0	NA	NA	NA		NA	NA	NA	NA	0	NA	NA	NA	NA	NA
MSTRG.21338	chr6:136398950-136400428	MSTRG.21338.1	mono-exonic	MSTRG.21338.1_3	ORF overlap	474	158	18.06 kDa	None	None	None	None	NA	NA	NA	NA	NA	NA	NA	NA	NA	NA	NA	0	NA	NA	NA	yes: Tubb3-ps1 (Origin gene: Tubb3 , chr8:136,375,424-136,377,133)	superfamily	215107	1	155	154	7.06e-100	294.038	cl30499	PLN00220 superfamily	-
MSTRG.21529	chr7:4919585-4923187	MSTRG.21529.1	mono-exonic	MSTRG.21529.1_17	None	654	218	23.06 kDa	None	Exon overlap Zfp628	None	None	NA	NA	NA	NA	NA	NA	NA	NA	NA	NA	NA	0	NA	NA	NA		NA	NA	NA	NA	0	NA	NA	NA	NA	NA
MSTRG.21529	chr7:4919585-4923187	MSTRG.21529.1	mono-exonic	MSTRG.21529.1_27	None	456	152	14.71 kDa	None	Exon overlap Zfp628	None	None	NA	NA	NA	NA	NA	NA	NA	NA	NA	NA	NA	0	NA	NA	NA		NA	NA	NA	NA	0	NA	NA	NA	NA	NA
MSTRG.21534	chr7:5038275-5048773	MSTRG.21534.1	multi-exonic	MSTRG.21534.1_1	5' end	774	258	28.76 kDa	Zfp580 (XM_030242961.1)	None	None	None	NA	NA	NA	NA	NA	NA	NA	NA	NA	NA	NA	0	NA	NA	NA		NA	NA	NA	NA	0	NA	NA	NA	NA	NA
MSTRG.21534	chr7:5038275-5048773	MSTRG.21534.1	multi-exonic	MSTRG.21534.1_7	5' end	717	239	25.62 kDa	Zfp580 (XM_030242961.1)	None	None	None	NA	NA	NA	NA	NA	NA	NA	NA	NA	NA	NA	0	NA	NA	NA		NA	NA	NA	NA	0	NA	NA	NA	NA	NA
MSTRG.21534	chr7:5038275-5048773	MSTRG.21534.1	multi-exonic	MSTRG.21534.1_14	5' end	654	218	24.05 kDa	Zfp580 (XM_030242961.1)	None	None	None	NA	NA	NA	NA	NA	NA	NA	NA	NA	NA	NA	0	NA	NA	NA		NA	NA	NA	NA	0	NA	NA	NA	NA	NA
MSTRG.21534	chr7:5038275-5048773	MSTRG.21534.2	multi-exonic	MSTRG.21534.2_2	5' end	774	258	28.76 kDa	Zfp580 (XM_030242961.1)	None	None	None	NA	NA	NA	NA	NA	NA	NA	NA	NA	NA	NA	0	NA	NA	NA		NA	NA	NA	NA	0	NA	NA	NA	NA	NA
MSTRG.21534	chr7:5038275-5048773	MSTRG.21534.2	multi-exonic	MSTRG.21534.2_9	5' end	717	239	25.62 kDa	Zfp580 (XM_030242961.1)	None	None	None	NA	NA	NA	NA	NA	NA	NA	NA	NA	NA	NA	0	NA	NA	NA		NA	NA	NA	NA	0	NA	NA	NA	NA	NA
MSTRG.21534	chr7:5038275-5048773	MSTRG.21534.2	multi-exonic	MSTRG.21534.2_20	5' end	654	218	24.05 kDa	Zfp580 (XM_030242961.1)	None	None	None	NA	NA	NA	NA	NA	NA	NA	NA	NA	NA	NA	0	NA	NA	NA		NA	NA	NA	NA	0	NA	NA	NA	NA	NA
MSTRG.21564	chr7:7080703-7083305	MSTRG.21564.1	mono-exonic	MSTRG.21564.1_45	None	1791	597	66.81 kDa	None	None	IAPLTR3-int	ERVK	NA	NA	NA	NA	NA	NA	NA	NA	NA	NA	NA	0	NA	NA	NA		superfamily	395483	262	454	192	8.22e-33	124.581	cl02908	Gag_p24 superfamily	-
MSTRG.21564	chr7:7080703-7083305	MSTRG.21564.1	mono-exonic	MSTRG.21564.1_45	None	1791	597	66.81 kDa	None	None	IAPLTR3-int	ERVK	NA	NA	NA	NA	NA	NA	NA	NA	NA	NA	NA	0	NA	NA	NA		superfamily	396766	5	84	79	7.31e-14	66.978	cl03546	Gag_p10 superfamily	-
MSTRG.21564	chr7:7080703-7083305	MSTRG.21564.1	mono-exonic	MSTRG.21564.1_45	None	1791	597	66.81 kDa	None	None	IAPLTR3-int	ERVK	NA	NA	NA	NA	NA	NA	NA	NA	NA	NA	NA	0	NA	NA	NA		superfamily	227414	480	524	44	3.11e-08	53.7011	cl34894	AIR1 superfamily	-
MSTRG.21670	chr7:19043833-19053946	MSTRG.21670.1	multi-exonic	MSTRG.21670.1_47	None	609	203	21.99 kDa	None	Exon overlap Sympk	None	None	NA	NA	NA	NA	NA	NA	NA	NA	NA	NA	NA	0	NA	NA	NA		NA	NA	NA	NA	0	NA	NA	NA	NA	NA
MSTRG.21670	chr7:19043833-19053946	MSTRG.21670.2	multi-exonic	MSTRG.21670.2_4	None	609	203	21.99 kDa	None	Exon overlap Sympk	None	None	NA	NA	NA	NA	NA	NA	NA	NA	NA	NA	NA	0	NA	NA	NA		NA	NA	NA	NA	0	NA	NA	NA	NA	NA
MSTRG.21683	chr7:19218931-19228216	MSTRG.21683.1	mono-exonic	MSTRG.21683.1_196	None	861	287	30.49 kDa	None	Exon overlap Gpr4	None	None	NA	NA	NA	NA	NA	NA	NA	NA	NA	NA	NA	0	NA	NA	NA		NA	NA	NA	NA	0	NA	NA	NA	NA	NA
MSTRG.21683	chr7:19218931-19228216	MSTRG.21683.1	mono-exonic	MSTRG.21683.1_197	None	510	170	18.14 kDa	None	Exon overlap Gpr4	None	None	NA	NA	NA	NA	NA	NA	NA	NA	NA	NA	NA	0	NA	NA	NA		NA	NA	NA	NA	0	NA	NA	NA	NA	NA
MSTRG.21735	chr7:24332637-24334101	MSTRG.21735.1	mono-exonic	MSTRG.21735.1_5	ORF overlap	456	152	16.90 kDa	None	Exon overlap Tesc1	None	None	NA	NA	NA	NA	NA	NA	NA	NA	NA	NA	NA	0	NA	NA	NA		NA	NA	NA	NA	0	NA	NA	NA	NA	NA
MSTRG.21735	chr7:24332637-24334101	MSTRG.21735.1	mono-exonic	MSTRG.21735.1_21	ORF overlap	492	164	17.82 kDa	None	Exon overlap Tesc1	None	None	NA	NA	NA	NA	NA	NA	NA	NA	NA	NA	NA	0	NA	NA	NA		NA	NA	NA	NA	0	NA	NA	NA	NA	NA
MSTRG.21743	chr7:24509353-24513126	MSTRG.21743.1	mono-exonic	MSTRG.21743.1_11	None	486	162	16.82 kDa	Gm50092	Exon overlap Zfp428	None	None	NA	NA	NA	NA	NA	NA	NA	NA	NA	NA	NA	0	NA	NA	NA		superfamily	215641	15	142	127	0.00404374	36.764	cl33668	PLN03237 superfamily	-
MSTRG.21743	chr7:24509353-24513126	MSTRG.21743.1	mono-exonic	MSTRG.21743.1_42	None	1896	632	69.28 kDa	Gm50092	Exon overlap Zfp428	None	None	XP_021022917.1	Srrm5	10089 [Organism: Ryukyu mouse] [Scientific Name: Mus caroli]	93.841	552	31	1	57	608	1	549	0.873418	0	653	95.29		superfamily	240274	128	436	308	0.00329885	40.7437	cl36513	PTZ00112 superfamily	-
MSTRG.21752	chr7:24687889-24695262	MSTRG.21752.1	multi-exonic	MSTRG.21752.1_24	None	753	251	27.20 kDa	Gm1096	None	None	None	NA	NA	NA	NA	NA	NA	NA	NA	NA	NA	NA	0	NA	NA	NA		NA	NA	NA	NA	0	NA	NA	NA	NA	NA
MSTRG.21752	chr7:24687889-24695262	MSTRG.21752.3	multi-exonic	MSTRG.21752.3_25	None	534	178	19.36 kDa	Gm1096	None	None	None	NA	NA	NA	NA	NA	NA	NA	NA	NA	NA	NA	0	NA	NA	NA		NA	NA	NA	NA	0	NA	NA	NA	NA	NA
MSTRG.21777	chr7:25096028-25101046	MSTRG.21777.1	multi-exonic	MSTRG.21777.1_87	None	489	163	18.04 kDa	None	Exon overlap Pou2f2	None	None	NA	NA	NA	NA	NA	NA	NA	NA	NA	NA	NA	0	NA	NA	NA		NA	NA	NA	NA	0	NA	NA	NA	NA	NA
MSTRG.22002	chr7:35235874-35275572	MSTRG.22002.2	multi-exonic	MSTRG.22002.2_29	None	894	298	33.60 kDa	Gpatch1 (XM_030242935.1) longer ORFs detected	None	None	None	NP_001357815.1	Wdr88	10090 [Organism: house mouse] [Scientific Name: Mus musculus]	99.643	280	1	0	1	280	1	280	0.939597	3.59e-172	502	100		NA	NA	NA	NA	0	NA	NA	NA	NA	NA
MSTRG.22002	chr7:35235874-35275572	MSTRG.22002.2	multi-exonic	MSTRG.22002.2_57	None	1113	371	41.69 kDa	Gpatch1 (XM_030242935.1) longer ORFs detected	None	None	None	NP_001357815.1	Wdr88	10090 [Organism: house mouse] [Scientific Name: Mus musculus]	99.73	370	1	0	1	370	285	654	0.997305	0	731	100		specific	238121	3	294	291	1.27e-59	194.091	cd00200	WD40	cl29593
MSTRG.22002	chr7:35235874-35275572	MSTRG.22002.1	multi-exonic	MSTRG.22002.1_23	None	1965	655	73.75 kDa	Gpatch1 (XM_030242935.1) longer ORFs detected	None	None	None	NP_001357815.1	Wdr88	10090 [Organism: house mouse] [Scientific Name: Mus musculus]	100	654	0	0	1	654	1	654	0.998473	0	1243	100		specific	238121	281	578	297	7.56e-60	202.18	cd00200	WD40	cl29593
MSTRG.22002	chr7:35235874-35275572	MSTRG.22002.3	multi-exonic	MSTRG.22002.3_20	None	1398	466	52.98 kDa	Gpatch1 (XM_030242935.1) longer ORFs detected	None	None	None	NP_001357815.1	Wdr88	10090 [Organism: house mouse] [Scientific Name: Mus musculus]	99.134	462	2	1	1	462	1	460	0.991416	0	874	99.57		superfamily	421866	285	452	167	1.69e-31	122.058	cl29593	WD40 superfamily	-
MSTRG.22002	chr7:35235874-35275572	MSTRG.22002.3	multi-exonic	MSTRG.22002.3_39	None	543	181	20.10 kDa	Gpatch1 (XM_030242935.1) longer ORFs detected	None	None	None	XP_036009102.1	Wdr88	10090 [Organism: house mouse] [Scientific Name: Mus musculus]	97.386	153	4	0	28	180	217	369	0.845304	6.89e-104	313	98.04		superfamily	421866	17	82	65	3.05e-08	51.952	cl29593	WD40 superfamily	-
MSTRG.22002	chr7:35235874-35275572	MSTRG.22002.4	multi-exonic	MSTRG.22002.4_18	None	1398	466	52.98 kDa	Gpatch1 (XM_030242935.1) longer ORFs detected	None	None	None	NP_001357815.1	Wdr88	10090 [Organism: house mouse] [Scientific Name: Mus musculus]	99.134	462	2	1	1	462	1	460	0.991416	0	874	99.57		superfamily	421866	285	452	167	1.69e-31	122.058	cl29593	WD40 superfamily	-
MSTRG.22002	chr7:35235874-35275572	MSTRG.22002.4	multi-exonic	MSTRG.22002.4_37	None	504	168	18.67 kDa	Gpatch1 (XM_030242935.1) longer ORFs detected	None	None	None	NP_001357815.1	Wdr88	10090 [Organism: house mouse] [Scientific Name: Mus musculus]	97.143	140	4	0	28	167	515	654	0.833333	2.54e-71	237	97.86		superfamily	421866	33	95	62	3.22e-13	65.434	cl29593	WD40 superfamily	-
MSTRG.22002	chr7:35235874-35275572	MSTRG.22002.5	multi-exonic	MSTRG.22002.5_20	None	1740	580	65.18 kDa	Gpatch1 (XM_030242935.1) longer ORFs detected	None	None	None	NP_001357815.1	Wdr88	10090 [Organism: house mouse] [Scientific Name: Mus musculus]	100	570	0	0	1	570	1	570	0.982759	0	1112	100		specific	238121	281	569	288	3.07e-55	188.313	cd00200	WD40	cl29593
MSTRG.22100	chr7:41345802-41369699	MSTRG.22100.1	multi-exonic	MSTRG.22100.1_12	None	2730	910	106.51 kDa	None	None	L1Md_F2	LINE1	NA	NA	NA	NA	NA	NA	NA	NA	NA	NA	NA	0	NA	NA	NA		specific	238827	150	412	262	5.56e-65	217.159	cd01650	RT_nLTR_like	cl02808
MSTRG.22100	chr7:41345802-41369699	MSTRG.22100.1	multi-exonic	MSTRG.22100.1_12	None	2730	910	106.51 kDa	None	None	L1Md_F2	LINE1	NA	NA	NA	NA	NA	NA	NA	NA	NA	NA	NA	0	NA	NA	NA		specific	400570	876	894	18	0.00171222	36.5017	pfam08333	DUF1725	cl07081
MSTRG.22116	chr7:43253731-43265621	MSTRG.22116.1	multi-exonic	MSTRG.22116.1_6	None	468	156	18.15 kDa	Gm35588 (XM_011250935.2) partial ORF	None	None	None	NA	NA	NA	NA	NA	NA	NA	NA	NA	NA	NA	0	NA	NA	NA		NA	NA	NA	NA	0	NA	NA	NA	NA	NA
MSTRG.22116	chr7:43253731-43265621	MSTRG.22116.1	multi-exonic	MSTRG.22116.1_8	None	519	173	19.91 kDa	Gm35588 (XM_011250935.2) partial ORF	None	None	None	NA	NA	NA	NA	NA	NA	NA	NA	NA	NA	NA	0	NA	NA	NA		NA	NA	NA	NA	0	NA	NA	NA	NA	NA
MSTRG.22116	chr7:43253731-43265621	MSTRG.22116.1	multi-exonic	MSTRG.22116.1_14	None	468	156	18.24 kDa	Gm35588 (XM_011250935.2) new ORF	None	None	None	NA	NA	NA	NA	NA	NA	NA	NA	NA	NA	NA	0	NA	NA	NA		NA	NA	NA	NA	0	NA	NA	NA	NA	NA
MSTRG.22116	chr7:43253731-43265621	MSTRG.22116.1	multi-exonic	MSTRG.22116.1_55	None	1191	397	46.47 kDa	Gm35588 (XM_011250935.2) partial ORF	None	None	None	NA	NA	NA	NA	NA	NA	NA	NA	NA	NA	NA	0	NA	NA	NA		specific	396083	14	54	40	4.5e-21	85.1463	pfam01352	KRAB	cl02581
MSTRG.22116	chr7:43253731-43265621	MSTRG.22116.1	multi-exonic	MSTRG.22116.1_55	None	1191	397	46.47 kDa	Gm35588 (XM_011250935.2) partial ORF	None	None	None	NA	NA	NA	NA	NA	NA	NA	NA	NA	NA	NA	0	NA	NA	NA		specific	227381	223	371	148	1.77e-10	62.4058	COG5048	COG5048	cl34881
MSTRG.22116	chr7:43253731-43265621	MSTRG.22116.1	multi-exonic	MSTRG.22116.1_55	None	1191	397	46.47 kDa	Gm35588 (XM_011250935.2) partial ORF	None	None	None	NA	NA	NA	NA	NA	NA	NA	NA	NA	NA	NA	0	NA	NA	NA		specific	404364	155	180	25	0.00133995	35.7877	pfam13465	zf-H2C2_2	cl22375
MSTRG.22335	chr7:64072627-64092399	MSTRG.22335.1	mono-exonic	MSTRG.22335.1_9	None	759	253	26.52 kDa	None	None	None	None	NA	NA	NA	NA	NA	NA	NA	NA	NA	NA	NA	0	NA	NA	NA		NA	NA	NA	NA	0	NA	NA	NA	NA	NA
MSTRG.22335	chr7:64072627-64092399	MSTRG.22335.1	mono-exonic	MSTRG.22335.1_19	None	822	274	29.80 kDa	None	None	None	None	NA	NA	NA	NA	NA	NA	NA	NA	NA	NA	NA	0	NA	NA	NA		NA	NA	NA	NA	0	NA	NA	NA	NA	NA
MSTRG.22335	chr7:64072627-64092399	MSTRG.22335.1	mono-exonic	MSTRG.22335.1_24	None	1053	351	38.11 kDa	None	None	None	None	NA	NA	NA	NA	NA	NA	NA	NA	NA	NA	NA	0	NA	NA	NA		NA	NA	NA	NA	0	NA	NA	NA	NA	NA
MSTRG.22335	chr7:64072627-64092399	MSTRG.22335.1	mono-exonic	MSTRG.22335.1_28	None	702	234	25.44 kDa	None	None	None	None	NA	NA	NA	NA	NA	NA	NA	NA	NA	NA	NA	0	NA	NA	NA		NA	NA	NA	NA	0	NA	NA	NA	NA	NA
MSTRG.22335	chr7:64072627-64092399	MSTRG.22335.1	mono-exonic	MSTRG.22335.1_32	None	1137	379	40.78 kDa	None	None	None	None	NA	NA	NA	NA	NA	NA	NA	NA	NA	NA	NA	0	NA	NA	NA		NA	NA	NA	NA	0	NA	NA	NA	NA	NA
MSTRG.22335	chr7:64072627-64092399	MSTRG.22335.1	mono-exonic	MSTRG.22335.1_37	None	534	178	19.38 kDa	None	None	None	None	NA	NA	NA	NA	NA	NA	NA	NA	NA	NA	NA	0	NA	NA	NA		NA	NA	NA	NA	0	NA	NA	NA	NA	NA
MSTRG.22335	chr7:64072627-64092399	MSTRG.22335.1	mono-exonic	MSTRG.22335.1_41	None	1440	480	51.01 kDa	None	None	None	None	NA	NA	NA	NA	NA	NA	NA	NA	NA	NA	NA	0	NA	NA	NA		NA	NA	NA	NA	0	NA	NA	NA	NA	NA
MSTRG.22335	chr7:64072627-64092399	MSTRG.22335.1	mono-exonic	MSTRG.22335.1_57	None	1101	367	39.58 kDa	None	None	None	None	NA	NA	NA	NA	NA	NA	NA	NA	NA	NA	NA	0	NA	NA	NA		NA	NA	NA	NA	0	NA	NA	NA	NA	NA
MSTRG.22335	chr7:64072627-64092399	MSTRG.22335.1	mono-exonic	MSTRG.22335.1_63	None	453	151	15.93 kDa	None	None	None	None	NA	NA	NA	NA	NA	NA	NA	NA	NA	NA	NA	0	NA	NA	NA		NA	NA	NA	NA	0	NA	NA	NA	NA	NA
MSTRG.22335	chr7:64072627-64092399	MSTRG.22335.1	mono-exonic	MSTRG.22335.1_69	None	573	191	20.49 kDa	None	None	None	None	NA	NA	NA	NA	NA	NA	NA	NA	NA	NA	NA	0	NA	NA	NA		NA	NA	NA	NA	0	NA	NA	NA	NA	NA
MSTRG.22335	chr7:64072627-64092399	MSTRG.22335.1	mono-exonic	MSTRG.22335.1_71	None	474	158	17.17 kDa	None	None	None	None	NA	NA	NA	NA	NA	NA	NA	NA	NA	NA	NA	0	NA	NA	NA		NA	NA	NA	NA	0	NA	NA	NA	NA	NA
MSTRG.22335	chr7:64072627-64092399	MSTRG.22335.1	mono-exonic	MSTRG.22335.1_97	None	819	273	30.01 kDa	None	None	None	None	NA	NA	NA	NA	NA	NA	NA	NA	NA	NA	NA	0	NA	NA	NA		NA	NA	NA	NA	0	NA	NA	NA	NA	NA
MSTRG.22335	chr7:64072627-64092399	MSTRG.22335.1	mono-exonic	MSTRG.22335.1_118	None	552	184	20.05 kDa	None	None	None	None	NA	NA	NA	NA	NA	NA	NA	NA	NA	NA	NA	0	NA	NA	NA		NA	NA	NA	NA	0	NA	NA	NA	NA	NA
MSTRG.22335	chr7:64072627-64092399	MSTRG.22335.1	mono-exonic	MSTRG.22335.1_126	None	498	166	17.92 kDa	None	None	None	None	NA	NA	NA	NA	NA	NA	NA	NA	NA	NA	NA	0	NA	NA	NA		NA	NA	NA	NA	0	NA	NA	NA	NA	NA
MSTRG.22335	chr7:64072627-64092399	MSTRG.22335.1	mono-exonic	MSTRG.22335.1_138	None	510	170	18.57 kDa	None	None	None	None	NA	NA	NA	NA	NA	NA	NA	NA	NA	NA	NA	0	NA	NA	NA		NA	NA	NA	NA	0	NA	NA	NA	NA	NA
MSTRG.22335	chr7:64072627-64092399	MSTRG.22335.1	mono-exonic	MSTRG.22335.1_145	None	636	212	22.72 kDa	None	None	None	None	NA	NA	NA	NA	NA	NA	NA	NA	NA	NA	NA	0	NA	NA	NA		NA	NA	NA	NA	0	NA	NA	NA	NA	NA
MSTRG.22335	chr7:64072627-64092399	MSTRG.22335.1	mono-exonic	MSTRG.22335.1_148	None	471	157	16.54 kDa	None	None	None	None	NA	NA	NA	NA	NA	NA	NA	NA	NA	NA	NA	0	NA	NA	NA		NA	NA	NA	NA	0	NA	NA	NA	NA	NA
MSTRG.22335	chr7:64072627-64092399	MSTRG.22335.1	mono-exonic	MSTRG.22335.1_154	None	807	269	29.32 kDa	None	None	None	None	NA	NA	NA	NA	NA	NA	NA	NA	NA	NA	NA	0	NA	NA	NA		NA	NA	NA	NA	0	NA	NA	NA	NA	NA
MSTRG.22335	chr7:64072627-64092399	MSTRG.22335.1	mono-exonic	MSTRG.22335.1_177	None	1488	496	54.05 kDa	None	None	None	None	NA	NA	NA	NA	NA	NA	NA	NA	NA	NA	NA	0	NA	NA	NA		NA	NA	NA	NA	0	NA	NA	NA	NA	NA
MSTRG.22335	chr7:64072627-64092399	MSTRG.22335.1	mono-exonic	MSTRG.22335.1_180	None	504	168	17.93 kDa	None	None	None	None	NA	NA	NA	NA	NA	NA	NA	NA	NA	NA	NA	0	NA	NA	NA		NA	NA	NA	NA	0	NA	NA	NA	NA	NA
MSTRG.22335	chr7:64072627-64092399	MSTRG.22335.1	mono-exonic	MSTRG.22335.1_185	None	816	272	30.19 kDa	None	None	None	None	NA	NA	NA	NA	NA	NA	NA	NA	NA	NA	NA	0	NA	NA	NA		NA	NA	NA	NA	0	NA	NA	NA	NA	NA
MSTRG.22335	chr7:64072627-64092399	MSTRG.22335.1	mono-exonic	MSTRG.22335.1_186	None	492	164	18.58 kDa	None	None	None	None	NA	NA	NA	NA	NA	NA	NA	NA	NA	NA	NA	0	NA	NA	NA		NA	NA	NA	NA	0	NA	NA	NA	NA	NA
MSTRG.22335	chr7:64072627-64092399	MSTRG.22335.1	mono-exonic	MSTRG.22335.1_192	None	819	273	30.15 kDa	None	None	None	None	NA	NA	NA	NA	NA	NA	NA	NA	NA	NA	NA	0	NA	NA	NA		NA	NA	NA	NA	0	NA	NA	NA	NA	NA
MSTRG.22335	chr7:64072627-64092399	MSTRG.22335.1	mono-exonic	MSTRG.22335.1_198	None	705	235	25.54 kDa	None	None	None	None	NA	NA	NA	NA	NA	NA	NA	NA	NA	NA	NA	0	NA	NA	NA		NA	NA	NA	NA	0	NA	NA	NA	NA	NA
MSTRG.22335	chr7:64072627-64092399	MSTRG.22335.1	mono-exonic	MSTRG.22335.1_207	None	1338	446	47.81 kDa	None	None	None	None	NA	NA	NA	NA	NA	NA	NA	NA	NA	NA	NA	0	NA	NA	NA		NA	NA	NA	NA	0	NA	NA	NA	NA	NA
MSTRG.22335	chr7:64072627-64092399	MSTRG.22335.1	mono-exonic	MSTRG.22335.1_219	None	645	215	23.12 kDa	None	None	None	None	NA	NA	NA	NA	NA	NA	NA	NA	NA	NA	NA	0	NA	NA	NA		NA	NA	NA	NA	0	NA	NA	NA	NA	NA
MSTRG.22335	chr7:64072627-64092399	MSTRG.22335.1	mono-exonic	MSTRG.22335.1_221	None	1206	402	43.77 kDa	None	None	None	None	NA	NA	NA	NA	NA	NA	NA	NA	NA	NA	NA	0	NA	NA	NA		NA	NA	NA	NA	0	NA	NA	NA	NA	NA
MSTRG.22335	chr7:64072627-64092399	MSTRG.22335.1	mono-exonic	MSTRG.22335.1_226	None	1728	576	62.30 kDa	None	None	None	None	NA	NA	NA	NA	NA	NA	NA	NA	NA	NA	NA	0	NA	NA	NA		NA	NA	NA	NA	0	NA	NA	NA	NA	NA
MSTRG.22592	chr7:92554134-92560069	MSTRG.22592.1	mono-exonic	MSTRG.22592.1_54	None	627	209	24.16 kDa	None	Intron of MSTRG.22591	L1_Mus1	LINE1	SFW05773.1	L1 transposable element	83555 [Organism: Chlamydia abortus] Scientific Name: Chlamydia abortus]	86.538	208	28	0	1	208	61	268	0.995215	1.63e-129	375	92.31		superfamily	397235	28	125	97	7.05e-19	77.8988	cl25509	Transposase_22 superfamily	-
MSTRG.22592	chr7:92554134-92560069	MSTRG.22592.1	mono-exonic	MSTRG.22592.1_54	None	627	209	24.16 kDa	None	Intron of MSTRG.22591	L1_Mus1	LINE1	SFW05773.1	L1 transposable element	83555 [Organism: Chlamydia abortus] Scientific Name: Chlamydia abortus]	86.538	208	28	0	1	208	61	268	0.995215	1.63e-129	375	92.31		superfamily	407521	129	192	63	3.35e-13	62.0429	cl38762	Tnp_22_dsRBD superfamily	-
MSTRG.22855	chr7:118322772-118329151	MSTRG.22855.1	multi-exonic	MSTRG.22855.1_93	None	792	264	29.12 kDa	None	None	None	None	NP_001371070.1	Gm35083	10090 [Organism: house mouse] [Scientific Name: Mus musculus]	100	247	0	0	17	263	1	247	0.935606	3.58e-172	485	100		NA	NA	NA	NA	0	NA	NA	NA	NA	NA
MSTRG.22855	chr7:118322772-118329151	MSTRG.22855.2	multi-exonic	MSTRG.22855.2_3	None	792	264	29.12 kDa	None	None	None	None	NP_001371070.1	Gm35083	10090 [Organism: house mouse] [Scientific Name: Mus musculus]	100	247	0	0	17	263	1	247	0.935606	3.58e-172	485	100		NA	NA	NA	NA	0	NA	NA	NA	NA	NA
MSTRG.22855	chr7:118322772-118329151	MSTRG.22855.3	multi-exonic	MSTRG.22855.3_30	None	792	264	29.12 kDa	None	None	None	None	NP_001371070.1	Gm35083	10090 [Organism: house mouse] [Scientific Name: Mus musculus]	100	247	0	0	17	263	1	247	0.935606	3.58e-172	485	100		NA	NA	NA	NA	0	NA	NA	NA	NA	NA
MSTRG.22855	chr7:118322772-118329151	MSTRG.22855.4	multi-exonic	MSTRG.22855.4_20	None	792	264	29.12 kDa	None	None	None	None	NP_001371070.1	Gm35083	10090 [Organism: house mouse] [Scientific Name: Mus musculus]	100	247	0	0	17	263	1	247	0.935606	3.58e-172	485	100		NA	NA	NA	NA	0	NA	NA	NA	NA	NA
MSTRG.23245	chr7:141622059-141625339	MSTRG.23245.1	mono-exonic	MSTRG.23245.1_1	None	474	158	17.85 kDa	None	Exon overlap Ap2a2	None	None	NA	NA	NA	NA	NA	NA	NA	NA	NA	NA	NA	0	NA	NA	NA		NA	NA	NA	NA	0	NA	NA	NA	NA	NA
MSTRG.23245	chr7:141622059-141625339	MSTRG.23245.1	mono-exonic	MSTRG.23245.1_20	None	465	155	17.75 kDa	None	Exon overlap Ap2a2	None	None	NA	NA	NA	NA	NA	NA	NA	NA	NA	NA	NA	0	NA	NA	NA		NA	NA	NA	NA	0	NA	NA	NA	NA	NA
MSTRG.23245	chr7:141622059-141625339	MSTRG.23245.1	mono-exonic	MSTRG.23245.1_47	None	663	221	24.51 kDa	None	Exon overlap Ap2a2	None	None	NA	NA	NA	NA	NA	NA	NA	NA	NA	NA	NA	0	NA	NA	NA		NA	NA	NA	NA	0	NA	NA	NA	NA	NA
MSTRG.23472	chr8:19758166-19762554	MSTRG.23472.1	multi-exonic	MSTRG.23472.1_25	None	747	249	26.80 kDa	None	None	None	None	XP_036010300.1	Gm53405	10090 [Organism: house mouse] [Scientific Name: Mus musculus]	90.816	196	18	0	1	196	121	316	0.787149	1.51e-05	57.8	95.92		NA	NA	NA	NA	0	NA	NA	NA	NA	NA
MSTRG.23476	chr8:19930827-19935338	MSTRG.23476.1	multi-exonic	MSTRG.23476.1_53	None	1206	402	43.50 kDa	9530057J20Rik (XM_030243910.1) different splicing	None	None	None	XP_036010300.1	Gm53405	10090 [Organism: house mouse] [Scientific Name: Mus musculus]	82.464	211	21	1	54	264	122	316	0.524876	1.6e-14	85.9	87.2		NA	NA	NA	NA	0	NA	NA	NA	NA	NA
MSTRG.23483	chr8:20070069-20073250	MSTRG.23483.2	mono-exonic	MSTRG.23483.1_2	None	2823	941	101.48 kDa	None	None	None	None	XP_036010300.1	Gm53405	10090 [Organism: house mouse] [Scientific Name: Mus musculus]	76.048	334	28	3	36	335	1	316	0.354942	7.59e-17	95.1	80.54		NA	NA	NA	NA	0	NA	NA	NA	NA	NA
MSTRG.23485	chr8:20085370-20087538	MSTRG.23485.1	multi-exonic	MSTRG.23485.1_1	None	495	165	17.73 kDa	None	None	None	None	XP_036010300.1	Gm53405	10090 [Organism: house mouse] [Scientific Name: Mus musculus]	98.684	76	1	0	89	164	242	317	0.460606	1.38e-06	58.9	100		NA	NA	NA	NA	0	NA	NA	NA	NA	NA
MSTRG.23497	chr8:20510484-20516664	MSTRG.23497.1	multi-exonic	MSTRG.23497.1_85	None	2046	682	73.26 kDa	None	None	None	None	XP_036010300.1	Gm53405	10090 [Organism: house mouse] [Scientific Name: Mus musculus]	82.902	193	17	1	212	388	124	316	0.282991	3.63e-08	68.6	87.05		NA	NA	NA	NA	0	NA	NA	NA	NA	NA
MSTRG.23509	chr8:20649492-20650219	MSTRG.23509.1	mono-exonic	MSTRG.23509.1_14	None	531	177	18.94 kDa	Gm46074 (XR_001778766.2) predicted non-coding	None	None	None	XP_036010300.1	Gm53405	10090 [Organism: house mouse] [Scientific Name: Mus musculus]	83.333	192	16	1	1	176	126	317	1.08475	7.91e-11	71.2	86.98		NA	NA	NA	NA	0	NA	NA	NA	NA	NA
MSTRG.23549	chr8:23314803-23336179	MSTRG.23549.1	multi-exonic	MSTRG.23549.1_311	None	492	164	18.49 kDa	None	None	L1Md_F2	LINE1	CRH53683.1	Protein of uncharacterised function (DUF3704)	813 [Organism: Chlamydia trachomatis] [Scientific Name: Chlamydia trachomatis]	89.032	155	17	0	9	163	1	155	0.945122	6.3e-94	279	91.61		NA	NA	NA	NA	0	NA	NA	NA	NA	NA
MSTRG.23549	chr8:23314803-23336179	MSTRG.23549.1	multi-exonic	MSTRG.23549.1_366	None	603	201	22.77 kDa	None	None	None	None	NA	NA	NA	NA	NA	NA	NA	NA	NA	NA	NA	0	NA	NA	NA		NA	NA	NA	NA	0	NA	NA	NA	NA	NA
MSTRG.23549	chr8:23314803-23336179	MSTRG.23549.1	multi-exonic	MSTRG.23549.1_501	None	732	244	28.26 kDa	None	None	L1Md_T	LINE1	CRH55763.1	L1 transposable element	813 [Organism: Chlamydia trachomatis] [Scientific Name: Chlamydia trachomatis]	96.296	243	9	0	1	243	129	371	0.995902	7.05e-170	483	98.35		superfamily	397235	63	160	97	5.69e-23	89.4548	cl25509	Transposase_22 superfamily	-
MSTRG.23549	chr8:23314803-23336179	MSTRG.23549.1	multi-exonic	MSTRG.23549.1_501	None	732	244	28.26 kDa	None	None	L1Md_T	LINE1	CRH55763.1	L1 transposable element	813 [Organism: Chlamydia trachomatis] [Scientific Name: Chlamydia trachomatis]	96.296	243	9	0	1	243	129	371	0.995902	7.05e-170	483	98.35		superfamily	407521	164	227	63	3.39e-13	62.8133	cl38762	Tnp_22_dsRBD superfamily	-
MSTRG.23549	chr8:23314803-23336179	MSTRG.23549.2	multi-exonic	MSTRG.23549.2_6	None	732	244	28.26 kDa	None	None	L1Md_T	LINE1	CRH55763.1	L1 transposable element	813 [Organism: Chlamydia trachomatis] [Scientific Name: Chlamydia trachomatis]	96.296	243	9	0	1	243	129	371	0.995902	7.05e-170	483	98.35		superfamily	397235	63	160	97	5.69e-23	89.4548	cl25509	Transposase_22 superfamily	-
MSTRG.23549	chr8:23314803-23336179	MSTRG.23549.2	multi-exonic	MSTRG.23549.2_6	None	732	244	28.26 kDa	None	None	L1Md_T	LINE1	CRH55763.1	L1 transposable element	813 [Organism: Chlamydia trachomatis] [Scientific Name: Chlamydia trachomatis]	96.296	243	9	0	1	243	129	371	0.995902	7.05e-170	483	98.35		superfamily	407521	164	227	63	3.39e-13	62.8133	cl38762	Tnp_22_dsRBD superfamily	-
MSTRG.23709	chr8:40139898-40145669	MSTRG.23709.2	multi-exonic	MSTRG.23709.2_1	None	906	302	33.58 kDa	None	None	MMERVK10c-int	ERVK	SFW07158.1	Integrase core domain	83555 [Organism: Chlamydia abortus] Scientific Name: Chlamydia abortus]	96.678	301	10	0	1	301	150	450	0.996689	0	606	98.67		superfamily	417494	8	100	92	9.16e-25	96.6384	cl14782	RNase_H_like superfamily	-
MSTRG.23709	chr8:40139898-40145669	MSTRG.23709.2	multi-exonic	MSTRG.23709.2_1	None	906	302	33.58 kDa	None	None	MMERVK10c-int	ERVK	SFW07158.1	Integrase core domain	83555 [Organism: Chlamydia abortus] Scientific Name: Chlamydia abortus]	96.678	301	10	0	1	301	150	450	0.996689	0	606	98.67		superfamily	411202	165	274	109	5.87e-23	95.7355	cl41329	transpos_IS481 superfamily	-
MSTRG.23709	chr8:40139898-40145669	MSTRG.23709.2	multi-exonic	MSTRG.23709.2_1	None	906	302	33.58 kDa	None	None	MMERVK10c-int	ERVK	SFW07158.1	Integrase core domain	83555 [Organism: Chlamydia abortus] Scientific Name: Chlamydia abortus]	96.678	301	10	0	1	301	150	450	0.996689	0	606	98.67		specific	396557	113	148	35	3.34e-11	56.9395	pfam02022	Integrase_Zn	cl08339
MSTRG.24008	chr8:72474957-72477713	MSTRG.24008.1	mono-exonic	MSTRG.24008.1_19	ORF overlap	465	155	17.01 kDa	None	Promoter overlap Cherp	None	None	XP_038951172.1	LOC103693914	10116 [Organism: Norway rat] [Scientific Name: Rattus norvegicus]	67.442	86	28	0	57	142	271	356	0.554839	5e-27	115	72.09		NA	NA	NA	NA	0	NA	NA	NA	NA	NA
MSTRG.24345	chr8:103797760-103802335	MSTRG.24345.1	mono-exonic	MSTRG.24345.1_31	None	3207	1069	115.43 kDa	None	Promoter overlap MSTRG.24346	None	None	BAC26754.1	4932416K20Rik	10090 [Organism: house mouse] [Scientific Name: Mus musculus]	94.774	421	22	0	648	1068	53	473	0.393826	0	711	96.2		superfamily	223021	634	940	306	1.39e-06	52.6333	cl33720	PHA03247 superfamily	-
MSTRG.24345	chr8:103797760-103802335	MSTRG.24345.1	mono-exonic	MSTRG.24345.1_49	None	741	247	33.41 kDa	None	Promoter overlap MSTRG.24346	None	None	NA	NA	NA	NA	NA	NA	NA	NA	NA	NA	NA	0	NA	NA	NA		NA	NA	NA	NA	0	NA	NA	NA	NA	NA
MSTRG.24345	chr8:103797760-103802335	MSTRG.24345.1	mono-exonic	MSTRG.24345.1_56	None	570	190	21.37 kDa	None	Promoter overlap MSTRG.24346	None	None	BAC26754.1	4932416K20Rik	10090 [Organism: house mouse] [Scientific Name: Mus musculus]	97.368	38	1	0	25	62	1	38	0.2	3.75e-05	55.5	97.37		NA	NA	NA	NA	0	NA	NA	NA	NA	NA
MSTRG.24368	chr8:104772371-104795256	MSTRG.24368.1	multi-exonic	MSTRG.24368.1_32	None	744	248	28.54 kDa	None	Promoter overlap 4932416K20Rik	L1Md_T	LINE1	SGW38391.1	Exonuclease III	83555 [Organism: Chlamydia abortus] Scientific Name: Chlamydia abortus]	95.798	238	10	0	6	243	38	275	0.959677	8.05e-164	473	97.48		specific	197310	13	210	197	9.77e-54	173.306	cd09076	L1-EN	cl00490
MSTRG.24368	chr8:104772371-104795256	MSTRG.24368.1	multi-exonic	MSTRG.24368.1_34	None	1554	518	59.98 kDa	None	Promoter overlap 4932416K20Rik	L1Md_T	LINE1	SHD82720.1	Retron-type Reverse transcriptase	83555 [Organism: Chlamydia abortus] Scientific Name: Chlamydia abortus]	96.132	517	20	0	1	517	133	649	0.998069	0	980	96.91		specific	238827	89	351	262	5.59e-69	220.626	cd01650	RT_nLTR_like	cl02808
MSTRG.24522	chr8:111299616-111301483	MSTRG.24522.1	mono-exonic	MSTRG.24522.1_26	ORF overlap	615	205	22.15 kDa	None	Promoter overlap Rfwd3	None	None	NA	NA	NA	NA	NA	NA	NA	NA	NA	NA	NA	0	NA	NA	NA		superfamily	223021	22	149	127	0.00970246	36.4549	cl33720	PHA03247 superfamily	-
MSTRG.25112	chr9:38313173-38317358	MSTRG.25112.1	mono-exonic	MSTRG.25112.1_10	None	507	169	18.90 kDa	None	None	IAPEz-int	ERVK	SFW03938.1	Integrase core domain	83555 [Organism: Chlamydia abortus] Scientific Name: Chlamydia abortus]	92.857	168	12	0	1	168	147	314	0.994083	1.81e-113	335	96.43		specific	395437	83	128	45	4.6e-14	62.7948	pfam00552	IN_DBD_C	cl02895
MSTRG.25112	chr9:38313173-38317358	MSTRG.25112.1	mono-exonic	MSTRG.25112.1_10	None	507	169	18.90 kDa	None	None	IAPEz-int	ERVK	SFW03938.1	Integrase core domain	83555 [Organism: Chlamydia abortus] Scientific Name: Chlamydia abortus]	92.857	168	12	0	1	168	147	314	0.994083	1.81e-113	335	96.43		superfamily	411202	1	35	34	0.000572268	39.1112	cl41329	transpos_IS481 superfamily	-
MSTRG.25112	chr9:38313173-38317358	MSTRG.25112.1	mono-exonic	MSTRG.25112.1_32	None	1014	338	38.46 kDa	None	None	IAPEz-int	ERVK	XP_036021566.1	Gm54326	10090 [Organism: house mouse] [Scientific Name: Mus musculus]	88.636	264	23	2	44	307	12	268	0.781065	6.09e-131	397	90.91		NA	NA	NA	NA	0	NA	NA	NA	NA	NA
MSTRG.25112	chr9:38313173-38317358	MSTRG.25112.1	mono-exonic	MSTRG.25112.1_38	None	504	168	18.96 kDa	None	None	IAPEz-int	ERVK	EDL21115.1	mCG4448	10090 [Organism: house mouse] [Scientific Name: Mus musculus]	86.667	105	14	0	8	112	1	105	0.625	4.18e-58	187	90.48		NA	NA	NA	NA	0	NA	NA	NA	NA	NA
MSTRG.25510	chr9:65562308-65570033	MSTRG.25510.1	multi-exonic	MSTRG.25510.1_6	None	642	214	23.99 kDa	Gm51712 (XR_003948345.1) does not include full ORF (annotated non-coding)	Exon overlap Plekho2	None	None	NA	NA	NA	NA	NA	NA	NA	NA	NA	NA	NA	0	NA	NA	NA		NA	NA	NA	NA	0	NA	NA	NA	NA	NA
MSTRG.26049	chr9:109468995-109477582	MSTRG.26049.1	mono-exonic	MSTRG.26049.1_13	None	477	159	17.99 kDa	None	None	IAPEz-int	ERVK	TNN04778.1	Envelope glycoprotein	6182 [Organism: flatworm] [Scientific Name: Schistosoma japonicum]	77.5	160	34	1	1	158	20	179	1.00629	2.22e-71	223	87.5		NA	NA	NA	NA	0	NA	NA	NA	NA	NA
MSTRG.26049	chr9:109468995-109477582	MSTRG.26049.1	mono-exonic	MSTRG.26049.1_45	None	1242	414	45.53 kDa	None	None	ERVB4_2-I_MM-int	ERVK	XP_011237992.1	a (agouti-signaling protein isoform X3)	10090 [Organism: house mouse] [Scientific Name: Mus musculus]	54.907	377	157	6	3	376	298	664	0.910628	2.22e-88	292	72.15		superfamily	306850	3	338	335	1.03e-76	248.171	cl27694	TLV_coat superfamily	-
MSTRG.26049	chr9:109468995-109477582	MSTRG.26049.1	mono-exonic	MSTRG.26049.1_147	None	810	270	30.54 kDa	None	None	IAPEz-int	ERVK	XP_036021566.1	Gm54326	10090 [Organism: house mouse] [Scientific Name: Mus musculus]	87.578	161	20	0	43	203	9	169	0.596296	4.51e-81	266	92.55		superfamily	395483	204	269	65	9.81e-10	56.7859	cl02908	Gag_p24 superfamily	-
MSTRG.26049	chr9:109468995-109477582	MSTRG.26049.1	mono-exonic	MSTRG.26049.1_164	None	993	331	35.48 kDa	None	None	ERVB4_2-I_MM-int	ERVK	XP_038951173.1	Endogenous retrovirus group K member 6 Gag polyprotein-like (LOC120097537)	10116 [Organism: Norway rat] [Scientific Name: Rattus norvegicus]	62.264	318	99	6	25	330	378	686	0.960725	1e-123	380	72.01		superfamily	395483	5	183	178	2.29e-32	119.188	cl02908	Gag_p24 superfamily	-
MSTRG.26049	chr9:109468995-109477582	MSTRG.26049.1	mono-exonic	MSTRG.26049.1_164	None	993	331	35.48 kDa	None	None	ERVB4_2-I_MM-int	ERVK	XP_038951173.1	Endogenous retrovirus group K member 6 Gag polyprotein-like (LOC120097537)	10116 [Organism: Norway rat] [Scientific Name: Rattus norvegicus]	62.264	318	99	6	25	330	378	686	0.960725	1e-123	380	72.01		specific	373297	251	286	35	6.07e-13	62.1865	pfam14787	zf-CCHC_5	cl20708
MSTRG.26049	chr9:109468995-109477582	MSTRG.26049.1	mono-exonic	MSTRG.26049.1_164	None	993	331	35.48 kDa	None	None	ERVB4_2-I_MM-int	ERVK	XP_038951173.1	Endogenous retrovirus group K member 6 Gag polyprotein-like (LOC120097537)	10116 [Organism: Norway rat] [Scientific Name: Rattus norvegicus]	62.264	318	99	6	25	330	378	686	0.960725	1e-123	380	72.01		superfamily	173561	208	269	61	2.64e-06	46.3385	cl31762	PTZ00368 superfamily	-
MSTRG.26070	chr9:110518222-110533628	MSTRG.26070.1	mono-exonic	MSTRG.26070.1_256	ORF overlap	1392	464	48.40 kDa		Exon overlap Kif9/Promoter overlap Setd2	None	None	NA	NA	NA	NA	NA	NA	NA	NA	NA	NA	NA	0	NA	NA	NA		NA	NA	NA	NA	0	NA	NA	NA	NA	NA
MSTRG.26145	chr9:115309908-115313711	MSTRG.26145.1	mono-exonic	MSTRG.26145.1_1	ORF overlap	687	229	25.07 kDa	None	Promoter overlap Stt3b	None	None	BAB30512.1	Gm9757	10090 [Organism: house mouse] [Scientific Name: Mus musculus]	100	68	0	0	161	228	108	175	0.296943	2.8e-35	134	100		NA	NA	NA	NA	0	NA	NA	NA	NA	NA
MSTRG.26420	chrX:33127302-33129006	MSTRG.26420.1	mono-exonic	MSTRG.26420.1_39	None	942	314	36.73 kDa	None	None	None	None	XP_003689011.1	Btbd35f25	10090 [Organism: house mouse] [Scientific Name: Mus musculus]	97.444	313	8	0	1	313	58	370	0.996815	0	617	98.4		superfamily	365784	23	133	110	1.49e-43	145.116	cl38908	BTB_POZ superfamily	-
MSTRG.26420	chrX:33127302-33129006	MSTRG.26420.1	mono-exonic	MSTRG.26420.1_39	None	942	314	36.73 kDa	None	None	None	None	XP_003689011.1	Btbd35f25	10090 [Organism: house mouse] [Scientific Name: Mus musculus]	97.444	313	8	0	1	313	58	370	0.996815	0	617	98.4		superfamily	421692	134	211	77	8.02e-23	89.9983	cl28903	BACK superfamily	-
MSTRG.26425	chrX:33777763-33779442	MSTRG.26425.1	multi-exonic	MSTRG.26425.1_3	None	711	237	27.10 kDa	Gm46683 (XM_017318672.1) unspliced	None	None	None	XP_017174161.1	Gm46683	10090 [Organism: house mouse] [Scientific Name: Mus musculus]	100	236	0	0	1	236	1	236	0.995781	1.3e-170	479	100		specific	396871	29	77	48	5.85e-22	85.0221	pfam02513	Spin-Ssty	cl03632
MSTRG.26425	chrX:33777763-33779442	MSTRG.26425.1	multi-exonic	MSTRG.26425.1_3	None	711	237	27.10 kDa	Gm46683 (XM_017318672.1) unspliced	None	None	None	XP_017174161.1	Gm46683	10090 [Organism: house mouse] [Scientific Name: Mus musculus]	100	236	0	0	1	236	1	236	0.995781	1.3e-170	479	100		specific	396871	108	155	47	3.83e-14	64.6065	pfam02513	Spin-Ssty	cl03632
MSTRG.26425	chrX:33777763-33779442	MSTRG.26425.1	multi-exonic	MSTRG.26425.1_3	None	711	237	27.10 kDa	Gm46683 (XM_017318672.1) unspliced	None	None	None	XP_017174161.1	Gm46683	10090 [Organism: house mouse] [Scientific Name: Mus musculus]	100	236	0	0	1	236	1	236	0.995781	1.3e-170	479	100		superfamily	396871	188	232	44	1.24e-07	46.8873	cl03632	Spin-Ssty superfamily	-
MSTRG.26430	chrX:36019857-36025848	MSTRG.26430.1	mono-exonic	MSTRG.26430.1_4	5' end	1371	457	50.67 kDa	Gm32904 (XR_391663.3) does not include ORF	Exon overlap Dock11	None	None	XP_023489559.1	LOC111771549	9796 [Organism: horse] [Scientific Name: Equus caballus]	30.932	472	269	11	5	456	1	435	1.03282	1.12e-37	154	47.25		superfamily	402211	39	183	144	1.09e-09	55.8363	cl11122	CtIP_N superfamily	-
MSTRG.26430	chrX:36019857-36025848	MSTRG.26430.1	mono-exonic	MSTRG.26430.1_88	5' end	456	152	17.11 kDa	Gm32904 (XR_391663.3) does not include ORF	Exon overlap Dock11	None	None	EGW04989.1	Hypothetical protein I79 003494	10029 [Organism: Chinese hamster] [Scientific Name: Cricetulus griseus]	52.941	51	24	0	15	65	1	51	0.335526	5.32e-06	52.8	64.71		NA	NA	NA	NA	0	NA	NA	NA	NA	NA
MSTRG.26484	chrX:39804695-39807044	MSTRG.26484.1	multi-exonic	MSTRG.26484.1_23	None	603	201	23.13 kDa	None	None	L1Md_T	LINE1	CRH55761.1	L1 transposable element	813 [Organism: Chlamydia trachomatis] [Scientific Name: Chlamydia trachomatis]	99.363	157	1	0	1	157	1	157	0.781095	6.73e-84	258	99.36		superfamily	237177	50	156	106	0.00720745	36.6798	cl36166	PRK12704 superfamily	-
MSTRG.26514	chrX:51957267-51957970	MSTRG.26514.1	mono-exonic	MSTRG.26514.1_1	None	591	197	22.57 kDa	None	None	None	None	XP_021009459.1	Uncharacterized protein C53C9.2-like (LOC110287154)	10089 [Organism: Ryukyu mouse] [Scientific Name: Mus caroli]	93.617	94	5	1	38	130	72	165	0.477157	2.01e-54	182	96.81		NA	NA	NA	NA	0	NA	NA	NA	NA	NA
MSTRG.26540	chrX:55891697-55895869	MSTRG.26540.1	multi-exonic	MSTRG.26540.1_2	None	816	272	30.41 kDa	None	Exon overlap 3830403N18Rik	None	None	NP_001365633.1	Gm35586	10090 [Organism: house mouse] [Scientific Name: Mus musculus]	100	239	0	0	33	271	1	239	0.878676	1.02e-175	494	100		NA	NA	NA	NA	0	NA	NA	NA	NA	NA
MSTRG.26545	chrX:56277107-56292955	MSTRG.26545.1	multi-exonic	MSTRG.26545.1_48	None	1341	447	50.50 kDa	Gm35953 (XM_006528354.4) overlaps ORF	None	None	None	XP_006528415.1	Gm35953	10090 [Organism: house mouse] [Scientific Name: Mus musculus]	100	422	0	0	25	446	1	422	0.944072	0	848	100		specific	396558	48	131	83	3.05e-31	114.877	pfam02023	SCAN	cl02605
MSTRG.26545	chrX:56277107-56292955	MSTRG.26545.1	multi-exonic	MSTRG.26545.1_48	None	1341	447	50.50 kDa	Gm35953 (XM_006528354.4) overlaps ORF	None	None	None	XP_006528415.1	Gm35953	10090 [Organism: house mouse] [Scientific Name: Mus musculus]	100	422	0	0	25	446	1	422	0.944072	0	848	100		specific	395048	403	425	22	0.000576095	36.8945	pfam00096	zf-C2H2	cl23491
MSTRG.26545	chrX:56277107-56292955	MSTRG.26545.1	multi-exonic	MSTRG.26545.1_48	None	1341	447	50.50 kDa	Gm35953 (XM_006528354.4) overlaps ORF	None	None	None	XP_006528415.1	Gm35953	10090 [Organism: house mouse] [Scientific Name: Mus musculus]	100	422	0	0	25	446	1	422	0.944072	0	848	100		specific	395048	375	397	22	0.00881118	33.4277	pfam00096	zf-C2H2	cl23491
MSTRG.26713	chrX:90198751-90200071	MSTRG.26713.1	mono-exonic	MSTRG.26713.1_16	None	1149	383	44.42 kDa	None	None	None	None	XP_021008377.1	Hemgnl (Hemogen-like; LOC110286275)	10089 [Organism: Ryukyu mouse] [Scientific Name: Mus caroli]	92.157	357	28	0	1	357	1	357	0.932115	0	684	96.08	yes: Hemgnl (Origin gene: Hemgn, chr4:46,393,989-46,404,183)	NA	NA	NA	NA	0	NA	NA	NA	NA	NA
MSTRG.26734	chrX:93980579-93985647	MSTRG.26734.1	multi-exonic	MSTRG.26734.1_2	5' end	2658	886	96.04 kDa	None	None	None	None	EDL29747.1	mCG113665	10090 [Organism: house mouse] [Scientific Name: Mus musculus]	93.737	463	0	1	1	463	1	434	0.522573	0	808	93.74		specific	371892	63	252	189	3.15e-19	85.4348	pfam12090	Spt20	cl13517
MSTRG.26734	chrX:93980579-93985647	MSTRG.26734.1	multi-exonic	MSTRG.26734.1_2	5' end	2658	886	96.04 kDa	None	None	None	None	EDL29747.1	mCG113665	10090 [Organism: house mouse] [Scientific Name: Mus musculus]	93.737	463	0	1	1	463	1	434	0.522573	0	808	93.74		superfamily	223021	464	733	269	7.06e-05	46.8553	cl33720	PHA03247 superfamily	-
MSTRG.26789	chrX:101704939-101706290	MSTRG.26789.1	mono-exonic	MSTRG.26789.1_1	None	741	247	28.38 kDa	None	None	None	None	RUS33445.1	Hypothetical protein BC938DRAFT 471627	994334 [Organism: Jimgerdemannia flammicorona] [Scientific name: Jimgerdemannia flammicorona]	43.939	66	31	3	101	162	9	72	0.267206	0.00022	53.9	62.12		NA	NA	NA	NA	0	NA	NA	NA	NA	NA
MSTRG.26789	chrX:101704939-101706290	MSTRG.26789.1	mono-exonic	MSTRG.26789.1_15	None	540	180	19.41 kDa	None	None	None	None	NP_001369163.1	Gcna	10090 [Organism: house mouse] [Scientific Name: Mus musculus]	100	125	0	0	26	150	354	478	0.694444	4.58e-70	231	100		superfamily	273344	1	52	51	0.00498681	36.8972	cl36772	2A1904 superfamily	-
MSTRG.26792	chrX:101817540-101821986	MSTRG.26792.1	multi-exonic	MSTRG.26792.1_43	None	1629	543	58.84 kDa	Gm3858 (XR_387012.2) overlaps ORF but not annotated as coding	None	None	None	XP_021008392.1	Uncharacterized protein CXorf49 homolog (LOC110286313)	10089 [Organism: Ryukyu mouse] [Scientific Name: Mus caroli]	89.382	518	45	3	1	514	1	512	0.953959	0	831	91.31		superfamily	406045	79	534	455	1.17e-110	336.722	cl21299	DUF4641 superfamily	-
MSTRG.26837	chrX:108484379-108486718	MSTRG.26837.1	mono-exonic	MSTRG.26837.1_43	None	2049	683	76.68 kDa	None	None	None	None	KAF7475623.1	Hypothetical protein GHT09 013493	9995 [Organism: woodchuck] [Scientific Name: Marmota monax]	35.725	697	378	14	1	681	1	643	1.0205	8.81e-84	289	51.51		NA	NA	NA	NA	0	NA	NA	NA	NA	NA
MSTRG.26874	chrX:123225013-123229715	MSTRG.26874.1	mono-exonic	MSTRG.26874.1_1	None	2181	727	75.02 kDa	None	None	None	None	QHN60852.1	Laidx	10090 [Organism: house mouse] [Scientific Name: Mus musculus]	92.35	719	55	0	1	719	2941	3659	0.988996	0	1202	94.99		superfamily	223021	48	486	438	0.00808169	39.9217	cl33720	PHA03247 superfamily	-
MSTRG.26874	chrX:123225013-123229715	MSTRG.26874.1	mono-exonic	MSTRG.26874.1_22	None	453	151	15.69 kDa	None	None	None	None	QHN60852.1	Laidx	10090 [Organism: house mouse] [Scientific Name: Mus musculus]	88.636	132	15	0	19	150	3407	3538	0.874172	1.35e-65	227	90.91		NA	NA	NA	NA	0	NA	NA	NA	NA	NA
MSTRG.26874	chrX:123225013-123229715	MSTRG.26874.1	mono-exonic	MSTRG.26874.1_70	None	513	171	17.66 kDa	None	None	None	None	QHN60852.1	Laidx	10090 [Organism: house mouse] [Scientific Name: Mus musculus]	92.941	170	12	0	1	170	3324	3493	0.994152	5.91e-93	306	94.12		NA	NA	NA	NA	0	NA	NA	NA	NA	NA
MSTRG.26874	chrX:123225013-123229715	MSTRG.26874.1	mono-exonic	MSTRG.26874.1_71	None	840	280	29.28 kDa	None	None	None	None	QHN60852.1	Laidx	10090 [Organism: house mouse] [Scientific Name: Mus musculus]	86.29	248	34	0	1	248	3541	3788	0.885714	1.64e-126	408	90.73		NA	NA	NA	NA	0	NA	NA	NA	NA	NA
MSTRG.26889	chrX:126022192-126031121	MSTRG.26889.1	mono-exonic	MSTRG.26889.1_1	None	2772	924	97.41 kDa	None	None	None	None	QHN60852.1	Laidx	10090 [Organism: house mouse] [Scientific Name: Mus musculus]	94.366	923	52	0	1	923	1771	2693	0.998918	0	1349	95.88		NA	NA	NA	NA	0	NA	NA	NA	NA	NA
MSTRG.26889	chrX:126022192-126031121	MSTRG.26889.1	mono-exonic	MSTRG.26889.1_2	None	1704	568	58.63 kDa	None	None	None	None	QHN60852.1	Laidx	10090 [Organism: house mouse] [Scientific Name: Mus musculus]	85.185	567	84	0	1	567	2705	3271	0.998239	0	819	89.24		NA	NA	NA	NA	0	NA	NA	NA	NA	NA
MSTRG.26969	chrX:139395345-139400268	MSTRG.26969.1	multi-exonic	MSTRG.26969.1_27	None	822	274	31.17 kDa	None	None	None	None	XP_036031566.1	Tumor rejection antigen P815A-like (LOC118574796)	38674 [Organism: southern grasshopper mouse] [Scientific Name: Onychomys torridus]	48.927	233	89	4	29	259	1	205	0.850365	2.12e-48	170	62.66		NA	NA	NA	NA	0	NA	NA	NA	NA	NA
MSTRG.27006	chrX:147842969-147844757	MSTRG.27006.1	mono-exonic	MSTRG.27006.1_10	None	1200	400	40.99 kDa	None	None	None	None	XP_034345956.1	EZH inhibitory protein-like LOC117698503	61156 [Organism: African grass rat] [Scientific Name: Arvicanthis niloticus]	43.568	241	115	3	46	285	25	245	0.6025	2.26e-09	72	50.62		NA	NA	NA	NA	0	NA	NA	NA	NA	NA
MSTRG.27007	chrX:147939521-147941416	MSTRG.27007.1	mono-exonic	MSTRG.27007.1_5	ORF overlap	573	191	19.74 kDa	None	None	None	None	NA	NA	NA	NA	NA	NA	NA	NA	NA	NA	NA	0	NA	NA	NA		superfamily	411344	118	190	72	0.000148008	41.6245	cl41419	gliding_GltG superfamily	-
MSTRG.27007	chrX:147939521-147941416	MSTRG.27007.1	mono-exonic	MSTRG.27007.1_20	ORF overlap	1242	414	42.76 kDa	None	None	None	None	XP_034345956.1	EZH inhibitory protein-like LOC117698503	61156 [Organism: African grass rat] [Scientific Name: Arvicanthis niloticus]	40	140	82	2	125	263	109	247	0.338164	0.000688	55.1	50		NA	NA	NA	NA	0	NA	NA	NA	NA	NA
MSTRG.27009	chrX:148234205-148235965	MSTRG.27009.1	mono-exonic	MSTRG.27009.1_6	None	666	222	22.93 kDa	None	None	None	None	NA	NA	NA	NA	NA	NA	NA	NA	NA	NA	NA	0	NA	NA	NA		superfamily	411344	110	198	88	2.09e-06	47.7877	cl41419	gliding_GltG superfamily	-
MSTRG.27009	chrX:148234205-148235965	MSTRG.27009.1	mono-exonic	MSTRG.27009.1_19	None	1221	407	41.80 kDa	None	None	None	None	XP_034345956.1	EZH inhibitory protein-like LOC117698503	61156 [Organism: African grass rat] [Scientific Name: Arvicanthis niloticus]	43.568	241	115	3	34	273	25	245	0.592138	1.49e-13	84.7	50.62		NA	NA	NA	NA	0	NA	NA	NA	NA	NA
MSTRG.27012	chrX:148800342-148802349	MSTRG.27012.1	mono-exonic	MSTRG.27012.1_1	None	1263	421	43.48 kDa	None	None	None	None	XP_034341912.1	EZH inhibitory protein-like LOC117698503	61156 [Organism: African grass rat] [Scientific Name: Arvicanthis niloticus]	46.614	251	116	5	46	287	76	317	0.5962	5.03e-10	74.3	54.18		NA	NA	NA	NA	0	NA	NA	NA	NA	NA
MSTRG.27012	chrX:148800342-148802349	MSTRG.27012.1	mono-exonic	MSTRG.27012.1_14	None	459	153	15.79 kDa	None	None	None	None	NA	NA	NA	NA	NA	NA	NA	NA	NA	NA	NA	0	NA	NA	NA		NA	NA	NA	NA	0	NA	NA	NA	NA	NA
MSTRG.27014	chrX:149020577-149022830	MSTRG.27014.1	mono-exonic	MSTRG.27014.1_6	None	459	153	15.94 kDa	None	None	None	None	NA	NA	NA	NA	NA	NA	NA	NA	NA	NA	NA	0	NA	NA	NA		NA	NA	NA	NA	0	NA	NA	NA	NA	NA
MSTRG.27014	chrX:149020577-149022830	MSTRG.27014.1	mono-exonic	MSTRG.27014.1_26	None	1206	402	41.40 kDa	None	None	None	None	XP_021009684.1	Ezhip	10089 [Organism: Ryukyu mouse] [Scientific Name: Mus caroli]	45.865	133	52	4	151	281	177	291	0.330846	0.000203	56.6	51.88		NA	NA	NA	NA	0	NA	NA	NA	NA	NA
MSTRG.27015	chrX:149392439-149394374	MSTRG.27015.1	mono-exonic	MSTRG.27015.1_1	None	1245	415	42.98 kDa	None	None	None	None	XP_034341838.1	EZH inhibitory protein-like LOC117694982	61156 [Organism: African grass rat] [Scientific Name: Arvicanthis niloticus]	45.455	297	146	7	3	287	25	317	0.715663	1.71e-17	97.1	52.86		NA	NA	NA	NA	0	NA	NA	NA	NA	NA
MSTRG.27015	chrX:149392439-149394374	MSTRG.27015.1	mono-exonic	MSTRG.27015.1_14	None	459	153	15.98 kDa	None	None	None	None	NA	NA	NA	NA	NA	NA	NA	NA	NA	NA	NA	0	NA	NA	NA		NA	NA	NA	NA	0	NA	NA	NA	NA	NA
MSTRG.27018	chrX:149728300-149729756	MSTRG.27018.1	mono-exonic	MSTRG.27018.1_9	ORF overlap	1260	420	43.35 kDa	None	None	None	None	XP_034345956.1	EZH inhibitory protein-like LOC117698503	61156 [Organism: African grass rat] [Scientific Name: Arvicanthis niloticus]	43.443	244	116	4	46	288	25	247	0.580952	2.31e-14	87.4	51.23		NA	NA	NA	NA	0	NA	NA	NA	NA	NA
MSTRG.27018	chrX:149728300-149729756	MSTRG.27018.1	mono-exonic	MSTRG.27018.1_16	ORF overlap	690	230	23.56 kDa	None	None	None	None	NA	NA	NA	NA	NA	NA	NA	NA	NA	NA	NA	0	NA	NA	NA		superfamily	411344	118	208	90	1.24e-05	45.4765	cl41419	gliding_GltG superfamily	-
MSTRG.27021	chrX:149897087-149899030	MSTRG.27021.1	mono-exonic	MSTRG.27021.1_12	None	1146	382	39.50 kDa	None	None	None	None	XP_034345956.1	EZH inhibitory protein-like LOC117698503	61156 [Organism: African grass rat] [Scientific Name: Arvicanthis niloticus]	45.082	244	112	4	46	288	25	247	0.638743	1.01e-13	85.1	52.46		NA	NA	NA	NA	0	NA	NA	NA	NA	NA
MSTRG.27023	chrX:150095395-150097477	MSTRG.27023.1	mono-exonic	MSTRG.27023.1_7	None	747	249	25.58 kDa	None	None	None	None	NA	NA	NA	NA	NA	NA	NA	NA	NA	NA	NA	0	NA	NA	NA		superfamily	237865	125	248	123	1.09e-06	48.9424	cl36447	PRK14951 superfamily	-
MSTRG.27023	chrX:150095395-150097477	MSTRG.27023.1	mono-exonic	MSTRG.27023.1_23	None	1320	440	45.28 kDa	None	None	None	None	XP_034341912.1	EZH inhibitory protein-like LOC117695163	61156 [Organism: African grass rat] [Scientific Name: Arvicanthis niloticus]	45.283	265	127	5	46	301	76	331	0.602273	9.95e-13	82.8	53.58		NA	NA	NA	NA	0	NA	NA	NA	NA	NA
